# Supplementary material for: A transcription network underlies the dual genomic coordination of mitochondrial biogenesis
Source: eLife journal article supplement (doi:10.7554/elife.96536), 2024-05-14
Supplement: fig4-figsupp1-data1 [file elife-96536-fig4-figsupp1-data1-v1.zip]

### Complex I

---

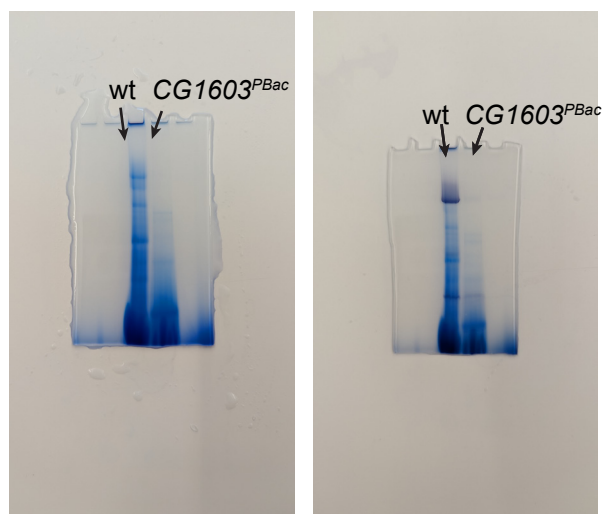

BN-PAGE

BN-PAGE +  
in-gel activity

### Complex II

---

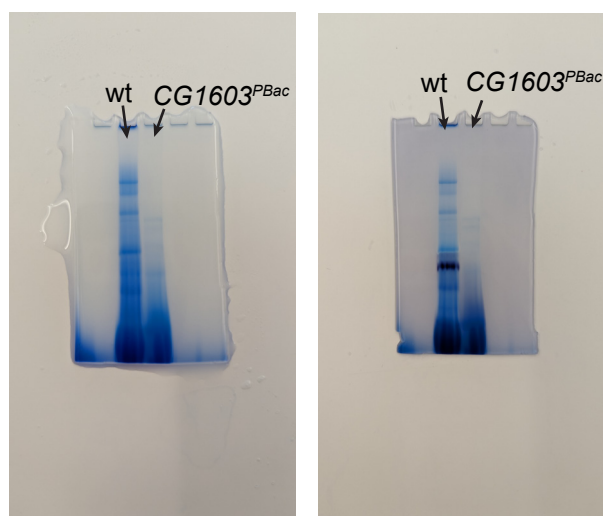

BN-PAGE

BN-PAGE +  
in-gel activity

### Complex IV

---

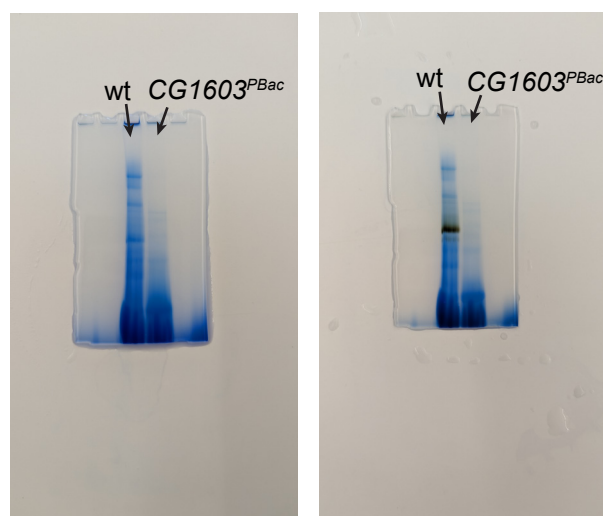

BN-PAGE

BN-PAGE +  
in-gel activity
