# Supplementary material for: A transcription network underlies the dual genomic coordination of mitochondrial biogenesis
Source: eLife. 2024 Dec 27;13:RP96536. doi: 10.7554/eLife.96536 (PMC11677238; doi:10.7554/eLife.96536)
Supplement: Figure 2—source data 1. [file elife-96536-fig2-data1.xlsx]

## Sheet: Source Data Figure 2B
	Source Data Figure 2B
	The promoter binding counts of TFs within different gene groups
		Mitochondria	Mito-EBR	ETC (non-testis-specific)	TFs
	Total	954	322	89	49
	ab	143	39	12	9
	abd-A	230	41	11	19
	achi	272	69	29	15
	bdp1	138	29	9	10
	bigmax	393	133	49	20
	CG10631	206	55	15	10
	CG11398	226	51	23	14
	CG12299	144	29	13	8
	CG12391	432	147	47	29
	CG15011	64	10	2	3
	CG1603	436	157	55	27
	CG16863	158	38	12	12
	CG17806	427	135	48	29
	CG17829	523	193	65	38
	CG2116	219	78	25	17
	CG4707	231	48	13	15
	CG4854	362	106	41	23
	CG6254	95	21	8	7
	CG7987	480	147	47	30
	CG9437	283	95	27	16
	CG9727	295	74	24	19
	CHES-1-like	403	125	40	24
	Crg-1	140	33	16	6
	CTCF	149	43	14	10
	Ebx	576	219	65	40
	Ets96B	405	119	42	27
	ewg	312	81	29	24
	Fer3	410	127	42	23
	ftz-f1	529	166	57	31
	ind	347	104	33	16
	Jra	332	78	28	26
	Lhr	229	77	27	13
	luna	151	36	14	8
	Met	303	71	22	19
	Myb	461	163	51	23
	Myc	257	112	28	18
	nerfin-1	388	118	36	29
	Nnk	201	61	21	17
	p53	173	45	16	11
	pan	17	5	2	4
	pros	215	38	14	17
	REPTOR-BP	182	33	12	9
	salr	162	33	13	10
	Stat92E	462	165	57	32
	suHw	109	16	7	8
	trem	515	203	63	35
	Trl	306	71	24	22
	Xbp1	314	89	30	18
	YL-1	507	214	69	31
