# Supplementary material for: A transcription network underlies the dual genomic coordination of mitochondrial biogenesis
Source: eLife. 2024 Dec 27;13:RP96536. doi: 10.7554/eLife.96536 (PMC11677238; doi:10.7554/eLife.96536)
Supplement: Figure 3—figure supplement 1—source data 1. [file elife-96536-fig3-figsupp1-data1.xlsx]

## Sheet: Source Data
	Source Data Figure 3—figure supplement 1
	Number of EC clone cells
		Ctrl	CG1603-i
	1	140	25
	2	407	25
	3	298	24
	4	135	23
	5	204	22
	6	194	19
	7	184	18
	8	136	23
	mean	212.25	22.375
	SD	95.2302	2.6152
	t-test	6.12728e-05
		p<0.001
