# Supplementary material for: A transcription network underlies the dual genomic coordination of mitochondrial biogenesis
Source: eLife. 2024 Dec 27;13:RP96536. doi: 10.7554/eLife.96536 (PMC11677238; doi:10.7554/eLife.96536)
Supplement: Figure 3—source data 1. [file elife-96536-fig3-data1.xlsx]

## Sheet: Source Data Figure 3B
	Source Data Figure 3B
	Relative TFAM-GFP level
		Ctrl	CG1603-i	CG1603-OE
	1	1.2384	0.50375	1.70007
	2	1.06339	0.632185	2.2706
	3	1.17931	0.389548	2.34995
	4	1.00772	0.348083	2.4566
	5	0.922061	0.401895	2.19231
	6	0.968534	0.472967	2.68077
	7	0.858176	0.224598	1.91222
	8	0.937381	0.320796	3.24657
	9	0.805369	0.239945	2.21495
	10	1.09866	0.317917	3.02122
	11	1.08231	0.511473	2.87448
	12	0.765959	0.540382	2.25604
	13	0.941946	0.424492	2.07026
	14	1.25769	0.162978	2.76373
	15	1.32871	0.409079	2.4622
	16	1.41947	0.639721	2.58277
	mean	1.05469	0.408738	2.44092
	SD	0.189605	0.138429	0.408774
	t-test (Ctrl_CG1603-i)	4.68593e-12
		p<0.001
	t-test (Ctrl_CG1603-OE)			2.96997e-13
				p<0.001

## Sheet: Source Data Figure 3C
	Source Data Figure 3C
	Relative mtDNA nucleoids number
		Ctrl	CG1603-i	CG1603-OE
	1	1.05407	0.543588	1.06267
	2	1.13301	0.429099	1.06969
	3	0.778176	0.334864	1.43517
	4	0.924717	0.326762	1.57947
	5	0.833479	0.283746	1.31409
	6	1.0823	0.534972	1.66615
	7	0.910241	0.275459	1.4072
	8	0.777452	0.475961	1.31867
	9	0.84566	0.371555	1.39358
	10	1.15493	0.712066	1.19084
	11	0.945048	0.51199	1.58371
	12	1.04905	0.641915	1.4586
	13	1.26572	0.221305	1.61257
	14	1.05479	0.536689	1.50517
	15	1.21679	0.518936	1.29327
	16	0.973011	0.344667	1.46114
	mean	0.999903	0.441473	1.397
	SD	0.146236	0.135473	0.175612
	t-test (Ctrl_CG1603-i)	6.62546e-12
		p<0.001
	t-test (Ctrl_CG1603-OE)			1.85046e-07
				p<0.001

## Sheet: Source Data Figure 3E
	Source Data Figure 3E
	Relative SDHA-mNG level
		Ctrl	CG1603-i	CG1603-OE
	1	0.774131	0.283219	1.10456
	2	0.875904	0.405882	1.05427
	3	1.30713	0.614509	1.28419
	4	1.17849	0.653188	1.26527
	5	0.823204	0.469767	1.73489
	6	0.795455	0.57563	1.59279
	7	1.13706	0.146433	1.38036
	8	1.29257	0.228851	1.33759
	9	1.17263	0.309767	1.1409
	10	0.815556	0.331339	1.76861
	11	1.05395	0.476923	0.885617
	12	0.814467	0.443686	1.12857
	13	0.976103	0.372711	1.24959
	14	1.12195	0.409297	1.45247
	15	0.82659	0.153928	0.947974
	16	1.09263	0.266041	1.09788
	mean	1.00361	0.383823	1.2766
	SD	0.187104	0.152516	0.259559
	t-test (Ctrl_CG1603-i)	2.44909e-11
		p<0.001
	t-test (Ctrl_CG1603-OE)			0.00186063
				p<0.01

## Sheet: Source Data Figure 3F
	Source Data Figure 3F
	Relative mitochondrial volume
		Ctrl	CG1603-i	CG1603-OE
	1	0.919489	0.688753	1.04103
	2	1.04524	0.767476	1.10297
	3	1.11493	0.799577	1.26133
	4	1.04138	0.829788	1.23031
	5	0.986958	0.764815	1.08061
	6	0.998628	0.989722	1.10311
	7	1.06028	0.417874	1.05522
	8	1.00255	0.422635	0.961879
	9	1.02889	0.892817	1.16734
	10	0.968428	0.529973	1.14292
	11	1.01673	0.691404	1.25322
	12	1.05139	0.695327	1.16884
	13	0.957078	0.802375	0.982923
	14	0.951098	0.559243	1.22198
	15	0.977705	0.294243	1.26649
	16	0.96859	0.745864	1.06439
	mean	1.00559	0.680743	1.13153
	SD	0.0498215	0.188572	0.0980526
	t-test (Ctrl_CG1603-i)	3.4421e-05
		p<0.001
	t-test (Ctrl_CG1603-OE)			7.5927e-05
				p<0.001
