# Supplementary material for: A transcription network underlies the dual genomic coordination of mitochondrial biogenesis
Source: eLife. 2024 Dec 27;13:RP96536. doi: 10.7554/eLife.96536 (PMC11677238; doi:10.7554/eLife.96536)
Supplement: Figure 5—figure supplement 1—source data 1. [file elife-96536-fig5-figsupp1-data1.xlsx]

## Sheet: Source Data
	Source Data Figure 5—figure supplement 1C
	MT Green relative intensity
		Ctrl	CG1603PBac
	1	1.29644	0.765499
	2	1.36468	0.61837
	3	0.606429	0.275921
	4	1.09601	0.519857
	5	0.758249	0.270377
	6	0.694707	0.21451
	7	0.925422	0.357802
	8	1.25806	0.49896
	mean	1	0.440162
	SD	0.294907	0.193064
	t-test	0.00101318
		p<0.01
