# Supplementary material for: A transcription network underlies the dual genomic coordination of mitochondrial biogenesis
Source: eLife. 2024 Dec 27;13:RP96536. doi: 10.7554/eLife.96536 (PMC11677238; doi:10.7554/eLife.96536)
Supplement: Figure 7—source data 1. [file elife-96536-fig7-data1.xlsx]

## Sheet: Source Data Figure 7A-C
	Source Data Figure 7A-C
	Distribution of CG1603 binding peaks
	Chromosomes	start	end	width	gene region	distanceToTSS	signalValue	qValue
	chrX	123800	124129	330	Promoter (1-2kb)	1307	159.596	2.93159
	chrX	127353	127470	118	Promoter (<=1kb)	0	214.105	4.10745
	chrX	175643	175826	184	Promoter (<=1kb)	-147	353.454	4.10745
	chrX	245803	246008	206	Promoter (<=1kb)	0	589.202	4.10745
	chrX	254726	255055	330	Promoter (<=1kb)	0	209.05	3.63846
	chrX	279513	279742	230	Promoter (<=1kb)	0	612.713	4.10745
	chrX	362104	362433	330	Promoter (<=1kb)	0	273.71	4.10745
	chrX	493847	494188	342	Promoter (<=1kb)	-352	2289	4.10745
	chrX	496334	496521	188	Promoter (<=1kb)	0	428.224	4.10745
	chrX	499650	499856	207	Promoter (<=1kb)	-102	496.308	4.10745
	chrX	512588	512917	330	3' UTR	3153	163.889	3.08644
	chrX	515734	516063	330	3' UTR	4222	188.92	3.6744
	chrX	522525	522742	218	Promoter (<=1kb)	484	618.086	4.10745
	chrX	523344	523655	312	Promoter (<=1kb)	-118	1129.13	4.10745
	chrX	524356	524685	330	Promoter (1-2kb)	-1130	187.932	3.67587
	chrX	526580	526808	229	Exon (FBtr0070088/FBgn0023535, exon 4 of 5)	3041	855.843	4.10745
	chrX	529837	530017	181	Promoter (<=1kb)	0	471.181	4.10745
	chrX	581894	582223	330	Promoter (<=1kb)	0	265.961	4.10745
	chrX	598204	598533	330	Intron (FBtr0339434/FBgn0025633, intron 11 of 11)	7162	175.521	3.47825
	chrX	603223	603344	122	Intron (FBtr0339434/FBgn0025633, intron 11 of 11)	12181	203.392	3.64976
	chrX	616824	617153	330	Promoter (<=1kb)	429	228.966	4.10745
	chrX	617552	617718	167	Promoter (<=1kb)	0	483.193	4.10745
	chrX	618575	618904	330	Promoter (<=1kb)	819	241.96	4.10745
	chrX	620241	620332	92	Promoter (<=1kb)	0	246.389	4.10745
	chrX	621189	621329	141	Promoter (<=1kb)	0	169.221	3.34532
	chrX	629370	629704	335	Promoter (<=1kb)	0	894.154	4.10745
	chrX	635724	636053	330	Promoter (<=1kb)	0	180.821	3.69005
	chrX	646482	646811	330	Promoter (<=1kb)	-493	141.785	2.36263
	chrX	647216	647337	122	Promoter (<=1kb)	0	237.183	4.10745
	chrX	654083	654412	330	Promoter (<=1kb)	526	171.319	3.34093
	chrX	655011	655300	290	Promoter (<=1kb)	-73	2120.84	4.10745
	chrX	656014	656282	269	Promoter (<=1kb)	0	497.307	4.10745
	chrX	678537	678866	330	Promoter (1-2kb)	1907	154.277	2.82548
	chrX	686470	686766	297	Promoter (<=1kb)	-68	723.006	4.10745
	chrX	693075	693404	330	Intron (FBtr0070130/FBgn0021764, intron 2 of 14)	6241	205.411	3.64617
	chrX	694421	694750	330	Intron (FBtr0070130/FBgn0021764, intron 2 of 14)	7587	166.747	3.24108
	chrX	711983	712127	145	Intron (FBtr0070130/FBgn0021764, intron 2 of 14)	25149	253.149	4.10745
	chrX	756012	756220	209	Promoter (<=1kb)	0	546.187	4.10745
	chrX	758817	759146	330	Promoter (<=1kb)	-448	225.369	4.10745
	chrX	759370	759654	285	Promoter (<=1kb)	0	1002.83	4.10745
	chrX	765020	765400	381	Promoter (<=1kb)	0	1697.3	4.10745
	chrX	767943	768272	330	Promoter (1-2kb)	-1673	178.09	3.69545
	chrX	768755	769084	330	Promoter (<=1kb)	-861	145.447	2.45654
	chrX	769803	770000	198	Promoter (<=1kb)	0	428.792	4.10745
	chrX	771761	771981	221	Promoter (1-2kb)	1735	562.717	4.10745
	chrX	779518	779631	114	Promoter (1-2kb)	1784	205.688	3.64572
	chrX	784448	784777	330	Promoter (<=1kb)	0	264.412	4.10745
	chrX	793003	793146	144	Promoter (<=1kb)	-1	388.718	4.10745
	chrX	796413	796742	330	3' UTR	3266	161.736	3.02919
	chrX	801400	801729	330	Promoter (<=1kb)	0	397.497	4.10745
	chrX	801601	801930	330	Promoter (<=1kb)	-122	199.366	3.65645
	chrX	805992	806073	82	Promoter (<=1kb)	-3	332.957	4.10745
	chrX	838165	838256	92	Promoter (1-2kb)	-1809	214.149	4.10745
	chrX	842106	842268	163	Promoter (1-2kb)	-1117	262.752	4.10745
	chrX	857156	857282	127	Intron (FBtr0332606/FBgn0264449, intron 2 of 10)	-5326	201.749	3.65273
	chrX	873838	873976	139	Promoter (1-2kb)	-1756	237.825	4.10745
	chrX	901078	901345	268	Promoter (1-2kb)	-1806	1146.63	4.10745
	chrX	921490	921614	125	Intron (FBtr0332612/FBgn0264449, intron 1 of 12)	5968	161.425	3.03022
	chrX	927423	927752	330	Promoter (<=1kb)	0	166.52	3.2418
	chrX	927969	928202	234	Promoter (<=1kb)	0	557.285	4.10745
	chrX	935185	935488	304	Promoter (<=1kb)	0	2090.99	4.10745
	chrX	940721	941050	330	Promoter (<=1kb)	0	213.73	4.10745
	chrX	948173	948502	330	Promoter (<=1kb)	-673	153.934	2.76149
	chrX	954425	954754	330	Promoter (2-3kb)	-2525	181.607	3.68863
	chrX	955963	956189	227	Distal Intergenic	-4063	599.163	4.10745
	chrX	966945	967103	159	Promoter (1-2kb)	1638	198.45	3.65817
	chrX	1009918	1010247	330	Promoter (1-2kb)	1396	189.349	3.6736
	chrX	1026539	1026868	330	Promoter (<=1kb)	0	287.381	4.10745
	chrX	1030570	1030730	161	Promoter (<=1kb)	-14	322.644	4.10745
	chrX	1033164	1033358	195	Promoter (<=1kb)	0	561.591	4.10745
	chrX	1041508	1041837	330	3' UTR	-4387	142.187	2.38502
	chrX	1052752	1052978	227	Promoter (1-2kb)	1227	580.684	4.10745
	chrX	1083242	1083405	164	Promoter (<=1kb)	-803	358.826	4.10745
	chrX	1129645	1129894	250	Intron (FBtr0113327/FBgn0040397, intron 1 of 4)	5002	768.03	4.10745
	chrX	1183251	1183580	330	Promoter (1-2kb)	-1198	173.074	3.4833
	chrX	1215087	1215318	232	Promoter (<=1kb)	0	699.441	4.10745
	chrX	1235383	1235658	276	Promoter (<=1kb)	-330	1057.19	4.10745
	chrX	1236609	1236864	256	Promoter (<=1kb)	0	866.461	4.10745
	chrX	1239795	1240124	330	Promoter (<=1kb)	0	140.583	2.35472
	chrX	1248859	1248958	100	Intron (FBtr0070244/FBgn0028550, intron 4 of 4)	-8975	205.566	3.64611
	chrX	1256173	1256502	330	Intron (FBtr0070244/FBgn0028550, intron 2 of 4)	-16289	189.844	3.67201
	chrX	1269826	1269908	83	Intron (FBtr0070244/FBgn0028550, intron 1 of 4)	5376	180.266	3.69111
	chrX	1270651	1270980	330	Intron (FBtr0070244/FBgn0028550, intron 1 of 4)	4304	204.602	3.64748
	chrX	1272960	1273133	174	Promoter (2-3kb)	2151	343.253	4.10745
	chrX	1275321	1275697	377	Promoter (<=1kb)	-37	3695.41	4.10745
	chrX	1277049	1277335	287	Promoter (1-2kb)	-1765	1387.36	4.10745
	chrX	1279031	1279360	330	Distal Intergenic	-3747	176.204	3.47732
	chrX	1286167	1286496	330	Promoter (<=1kb)	-794	253.016	4.10745
	chrX	1311349	1311485	137	Promoter (2-3kb)	-2877	227.109	4.10745
	chrX	1317740	1318069	330	Intron (FBtr0070239/FBgn0025641, intron 1 of 11)	4293	183.931	3.68386
	chrX	1322312	1322558	247	Promoter (<=1kb)	0	890.049	4.10745
	chrX	1370104	1370301	198	Promoter (<=1kb)	-279	342.821	4.10745
	chrX	1375248	1375577	330	Promoter (<=1kb)	0	287.776	4.10745
	chrX	1380436	1380634	199	Promoter (<=1kb)	0	502.414	4.10745
	chrX	1387229	1387558	330	Promoter (<=1kb)	507	172.351	3.33922
	chrX	1388937	1389266	330	Promoter (<=1kb)	369	167.053	3.24047
	chrX	1392899	1393044	146	Promoter (<=1kb)	-10	434.759	4.10745
	chrX	1398725	1398969	245	Distal Intergenic	5671	667.657	4.10745
	chrX	1399710	1400039	330	Distal Intergenic	6656	203.269	3.64989
	chrX	1407704	1408033	330	Promoter (1-2kb)	-1036	142.514	2.3964
	chrX	1464165	1464352	188	Promoter (<=1kb)	0	564.506	4.10745
	chrX	1470600	1470883	284	Promoter (<=1kb)	0	715.122	4.10745
	chrX	1476967	1477132	166	Promoter (<=1kb)	0	271.022	4.10745
	chrX	1478375	1478606	232	Promoter (<=1kb)	0	353.053	4.10745
	chrX	1483212	1483509	298	Promoter (<=1kb)	0	1060.82	4.10745
	chrX	1512830	1513119	290	Promoter (<=1kb)	0	913.44	4.10745
	chrX	1517648	1517788	141	Downstream (<=300bp)	4578	297.689	4.10745
	chrX	1618757	1618986	230	Promoter (<=1kb)	-602	655.633	4.10745
	chrX	1772609	1772938	330	Promoter (<=1kb)	-781	287.135	4.10745
	chrX	1824569	1824898	330	Promoter (<=1kb)	-45	242.276	4.10745
	chrX	1830600	1830914	315	Promoter (<=1kb)	-389	2041.19	4.10745
	chrX	1840509	1840838	330	Promoter (1-2kb)	-1790	146.936	2.46797
	chrX	1845537	1845712	176	Promoter (2-3kb)	2191	427.481	4.10745
	chrX	1849932	1850165	234	Intron (FBtr0309966/FBgn0283741, intron 3 of 3)	6586	639.046	4.10745
	chrX	1854212	1854309	98	Distal Intergenic	4662	168.931	3.34599
	chrX	1858900	1859229	330	Promoter (<=1kb)	0	209.101	3.63826
	chrX	1879658	1879868	211	Promoter (<=1kb)	0	406.448	4.10745
	chrX	1880308	1880507	200	Promoter (<=1kb)	-24	334.647	4.10745
	chrX	1889933	1890263	331	Promoter (<=1kb)	0	780.081	4.10745
	chrX	1897416	1897745	330	Promoter (1-2kb)	1779	198.495	3.65792
	chrX	1901756	1902085	330	Promoter (<=1kb)	0	189.557	3.67287
	chrX	1908040	1908245	206	Promoter (<=1kb)	0	302.504	4.10745
	chrX	1927489	1927818	330	Promoter (<=1kb)	0	242.28	4.10745
	chrX	1927942	1928271	330	Promoter (<=1kb)	0	270.428	4.10745
	chrX	1940042	1940276	235	Promoter (<=1kb)	-2	555.375	4.10745
	chrX	1943745	1943973	229	Promoter (1-2kb)	1805	399.561	4.10745
	chrX	1944242	1944476	235	Promoter (2-3kb)	2302	568.158	4.10745
	chrX	1947575	1947908	334	Intron (FBtr0333337/FBgn0264562, intron 2 of 11)	5635	2826.91	4.10745
	chrX	1948629	1948791	163	Intron (FBtr0333337/FBgn0264562, intron 2 of 11)	6689	296.612	4.10745
	chrX	1951761	1952069	309	Intron (FBtr0333337/FBgn0264562, intron 2 of 11)	9821	2618.34	4.10745
	chrX	1953033	1953240	208	Intron (FBtr0333337/FBgn0264562, intron 2 of 11)	11093	508.406	4.10745
	chrX	1963773	1964095	323	Intron (FBtr0333337/FBgn0264562, intron 3 of 11)	21833	1949.89	4.10745
	chrX	1968977	1969257	281	Intron (FBtr0333337/FBgn0264562, intron 4 of 11)	-23043	903.877	4.10745
	chrX	1973936	1974265	330	Intron (FBtr0333337/FBgn0264562, intron 4 of 11)	-18035	222.577	4.10745
	chrX	1984205	1984489	285	Intron (FBtr0333337/FBgn0264562, intron 5 of 11)	-7811	1164.77	4.10745
	chrX	1988717	1989046	330	Intron (FBtr0333337/FBgn0264562, intron 6 of 11)	-3254	215.699	4.10745
	chrX	1991923	1992252	330	Promoter (<=1kb)	-48	171.951	3.33991
	chrX	2009751	2009983	233	Promoter (<=1kb)	0	428.335	4.10745
	chrX	2036905	2037234	330	Promoter (<=1kb)	-286	274.234	4.10745
	chrX	2041305	2041580	276	Promoter (<=1kb)	0	638.028	4.10745
	chrX	2042349	2042516	168	Promoter (<=1kb)	-38	298.158	4.10745
	chrX	2050144	2050444	301	Promoter (<=1kb)	-24	2290.97	4.10745
	chrX	2050608	2050866	259	Promoter (<=1kb)	-488	638.482	4.10745
	chrX	2065146	2065475	330	Promoter (<=1kb)	0	170.074	3.3433
	chrX	2070717	2070891	175	Promoter (<=1kb)	-143	391.535	4.10745
	chrX	2072150	2072359	210	Promoter (<=1kb)	-54	454.273	4.10745
	chrX	2073384	2073583	200	Promoter (<=1kb)	0	492.852	4.10745
	chrX	2080372	2080639	268	Promoter (<=1kb)	0	1075.64	4.10745
	chrX	2083248	2083367	120	Promoter (2-3kb)	2638	327.304	4.10745
	chrX	2083869	2084156	288	Intron (FBtr0070376/FBgn0040395, intron 1 of 4)	3259	1315.68	4.10745
	chrX	2087565	2087816	252	Promoter (1-2kb)	-1520	787.345	4.10745
	chrX	2094039	2094297	259	Promoter (<=1kb)	0	807.761	4.10745
	chrX	2122069	2122244	176	Promoter (<=1kb)	-277	480.791	4.10745
	chrX	2123098	2123209	112	Promoter (<=1kb)	77	169.708	3.34408
	chrX	2123927	2124172	246	Promoter (<=1kb)	-641	658.752	4.10745
	chrX	2134312	2134550	239	Promoter (2-3kb)	2072	797.845	4.10745
	chrX	2135229	2135493	265	Promoter (1-2kb)	1129	957.69	4.10745
	chrX	2136482	2136645	164	Promoter (<=1kb)	0	286.615	4.10745
	chrX	2137174	2137548	375	Promoter (<=1kb)	-319	8828.44	4.10745
	chrX	2137719	2138072	354	Promoter (<=1kb)	299	1310.59	4.10745
	chrX	2141814	2141999	186	Promoter (<=1kb)	325	374.288	4.10745
	chrX	2146021	2146350	330	Promoter (<=1kb)	658	155.783	2.85757
	chrX	2146600	2146688	89	Promoter (1-2kb)	1237	280.191	4.10745
	chrX	2149642	2149814	173	Promoter (<=1kb)	0	420.555	4.10745
	chrX	2155908	2156237	330	Promoter (<=1kb)	-6	186.974	3.67782
	chrX	2158942	2159165	224	Promoter (<=1kb)	0	765.815	4.10745
	chrX	2165420	2165749	330	Promoter (1-2kb)	-1060	158.412	2.93442
	chrX	2166205	2166450	246	Promoter (<=1kb)	-359	639.099	4.10745
	chrX	2170480	2170809	330	Promoter (<=1kb)	-277	163.486	3.08737
	chrX	2172415	2172595	181	Promoter (<=1kb)	0	426.748	4.10745
	chrX	2184664	2184829	166	Promoter (<=1kb)	0	360.075	4.10745
	chrX	2191893	2192222	330	Promoter (<=1kb)	837	154.816	2.82366
	chrX	2208975	2209096	122	Promoter (<=1kb)	-297	180.782	3.69017
	chrX	2220002	2220166	165	Promoter (2-3kb)	2182	258.931	4.10745
	chrX	2270682	2270988	307	Promoter (<=1kb)	0	1176.62	4.10745
	chrX	2275034	2275227	194	Promoter (<=1kb)	0	406.159	4.10745
	chrX	2293596	2293891	296	Promoter (<=1kb)	-185	849.411	4.10745
	chrX	2294669	2294768	100	Promoter (<=1kb)	-698	291.495	4.10745
	chrX	2296134	2296476	343	Promoter (<=1kb)	668	876.134	4.10745
	chrX	2297562	2297873	312	Promoter (2-3kb)	2096	3364.11	4.10745
	chrX	2299061	2299321	261	Intron (FBtr0344007/FBgn0003079, intron 2 of 6)	3595	1532.56	4.10745
	chrX	2300534	2300868	335	Intron (FBtr0344007/FBgn0003079, intron 2 of 6)	5068	2953.38	4.10745
	chrX	2301159	2301488	330	Intron (FBtr0344007/FBgn0003079, intron 2 of 6)	5693	240.079	4.10745
	chrX	2302145	2302440	296	Intron (FBtr0344007/FBgn0003079, intron 2 of 6)	6679	950.652	4.10745
	chrX	2303968	2304258	291	Intron (FBtr0344007/FBgn0003079, intron 2 of 6)	8502	1323.45	4.10745
	chrX	2304543	2304872	330	Intron (FBtr0344007/FBgn0003079, intron 2 of 6)	9077	208.693	3.63919
	chrX	2306448	2306629	182	Intron (FBtr0344007/FBgn0003079, intron 2 of 6)	10982	622.785	4.10745
	chrX	2318459	2318673	215	Intron (FBtr0344007/FBgn0003079, intron 2 of 6)	3591	616.638	4.10745
	chrX	2321978	2322185	208	Promoter (<=1kb)	79	454.608	4.10745
	chrX	2329470	2329631	162	Promoter (<=1kb)	-528	265.845	4.10745
	chrX	2340110	2340274	165	Promoter (<=1kb)	-24	509.041	4.10745
	chrX	2344475	2344804	330	Promoter (<=1kb)	0	170.689	3.342
	chrX	2350341	2350450	110	Promoter (<=1kb)	-466	159.183	2.93271
	chrX	2358369	2358450	82	Intron (FBtr0307284/FBgn0003159, intron 1 of 3)	-3643	180.461	3.69064
	chrX	2359975	2360107	133	Intron (FBtr0307284/FBgn0003159, intron 1 of 3)	-5249	273.242	4.10745
	chrX	2396591	2396774	184	Distal Intergenic	-8927	286.567	4.10745
	chrX	2397957	2398076	120	Distal Intergenic	-10293	283.602	4.10745
	chrX	2443897	2444151	255	Promoter (<=1kb)	0	884.337	4.10745
	chrX	2462001	2462330	330	Intron (FBtr0070457/FBgn0040388, intron 2 of 8)	7713	233.628	4.10745
	chrX	2463231	2463560	330	Intron (FBtr0070457/FBgn0040388, intron 2 of 8)	6483	168.679	3.34644
	chrX	2464222	2464551	330	Intron (FBtr0070457/FBgn0040388, intron 2 of 8)	5492	264.403	4.10745
	chrX	2518428	2518575	148	Promoter (<=1kb)	-781	198.236	3.65868
	chrX	2533956	2534148	193	Intron (FBtr0342806/FBgn0284408, intron 2 of 42)	10760	566.768	4.10745
	chrX	2536243	2536434	192	Intron (FBtr0342806/FBgn0284408, intron 2 of 42)	8474	386.179	4.10745
	chrX	2582195	2582421	227	Promoter (<=1kb)	-56	607.841	4.10745
	chrX	2585829	2585945	117	Promoter (<=1kb)	-35	224.724	4.10745
	chrX	2588394	2588585	192	Promoter (<=1kb)	0	406.209	4.10745
	chrX	2589477	2589756	280	Promoter (<=1kb)	974	1156.63	4.10745
	chrX	2589712	2589943	232	Promoter (1-2kb)	1209	393.413	4.10745
	chrX	2593813	2594087	275	Promoter (<=1kb)	236	1273.36	4.10745
	chrX	2608871	2609099	229	Promoter (<=1kb)	0	526.424	4.10745
	chrX	2619781	2620011	231	Promoter (<=1kb)	0	974.258	4.10745
	chrX	2646137	2646614	478	Promoter (<=1kb)	-23	2777.4	4.10745
	chrX	2647490	2647711	222	Promoter (<=1kb)	853	734.029	4.10745
	chrX	2703723	2704077	355	Promoter (<=1kb)	0	7177.44	4.10745
	chrX	2704377	2704706	330	Promoter (<=1kb)	0	150.282	2.57818
	chrX	2708276	2708440	165	Promoter (<=1kb)	-244	302.754	4.10745
	chrX	2713931	2714095	165	Promoter (<=1kb)	0	308.876	4.10745
	chrX	2714736	2715065	330	Promoter (<=1kb)	657	145.06	2.45739
	chrX	2743243	2743371	129	Promoter (<=1kb)	-285	187.006	3.67764
	chrX	2744106	2744373	268	Promoter (<=1kb)	-30	1273.54	4.10745
	chrX	2757508	2757669	162	Intron (FBtr0309500/FBgn0028369, intron 2 of 10)	-6092	282.264	4.10745
	chrX	2761203	2761532	330	Intron (FBtr0309500/FBgn0028369, intron 2 of 10)	-9787	146.279	2.46947
	chrX	2786663	2786889	227	Promoter (2-3kb)	2433	671.765	4.10745
	chrX	2787284	2787600	317	Promoter (1-2kb)	1722	501.198	4.10745
	chrX	2813220	2813411	192	Intron (FBtr0309500/FBgn0028369, intron 2 of 10)	3339	256.801	4.10745
	chrX	2834683	2834796	114	Intron (FBtr0309500/FBgn0028369, intron 2 of 10)	24802	207.185	3.64256
	chrX	2861068	2861222	155	Intron (FBtr0309500/FBgn0028369, intron 2 of 10)	11631	247.876	4.10745
	chrX	2907192	2907361	170	Intron (FBtr0309500/FBgn0028369, intron 3 of 10)	-12409	298.366	4.10745
	chrX	2914105	2914434	330	Intron (FBtr0309500/FBgn0028369, intron 3 of 10)	-5336	142.678	2.3961
	chrX	2919854	2920034	181	Promoter (<=1kb)	84	291.697	4.10745
	chrX	2956799	2956946	148	Intron (FBtr0309500/FBgn0028369, intron 3 of 10)	8765	260.647	4.10745
	chrX	2978191	2978398	208	Intron (FBtr0309500/FBgn0028369, intron 4 of 10)	-4357	342.62	4.10745
	chrX	2993217	2993308	92	Intron (FBtr0309500/FBgn0028369, intron 4 of 10)	4166	148.42	2.47963
	chrX	3005888	3006015	128	Intron (FBtr0309500/FBgn0028369, intron 6 of 10)	16837	159.843	2.97941
	chrX	3007864	3008079	216	Intron (FBtr0309500/FBgn0028369, intron 6 of 10)	18813	739.443	4.10745
	chrX	3016581	3016750	170	Intron (FBtr0309500/FBgn0028369, intron 6 of 10)	27530	231.921	4.10745
	chrX	3019708	3019834	127	Intron (FBtr0309500/FBgn0028369, intron 6 of 10)	30657	148.043	2.48079
	chrX	3022465	3022737	273	Intron (FBtr0309500/FBgn0028369, intron 6 of 10)	33414	877.826	4.10745
	chrX	3024650	3024785	136	Intron (FBtr0309500/FBgn0028369, intron 6 of 10)	35599	245.35	4.10745
	chrX	3025601	3025826	226	Intron (FBtr0309500/FBgn0028369, intron 6 of 10)	36550	610.421	4.10745
	chrX	3036683	3036824	142	Intron (FBtr0309500/FBgn0028369, intron 6 of 10)	30658	192.145	3.66829
	chrX	3044967	3045074	108	Intron (FBtr0309500/FBgn0028369, intron 6 of 10)	22408	245.03	4.10745
	chrX	3046021	3046283	263	Intron (FBtr0309500/FBgn0028369, intron 6 of 10)	21199	1163.8	4.10745
	chrX	3047877	3047992	116	Intron (FBtr0309500/FBgn0028369, intron 6 of 10)	19490	271.516	4.10745
	chrX	3053402	3053549	148	Intron (FBtr0309500/FBgn0028369, intron 6 of 10)	13933	168.597	3.3466
	chrX	3065420	3065749	330	Promoter (1-2kb)	1733	142.753	2.39595
	chrX	3068398	3068592	195	Promoter (<=1kb)	-836	408.109	4.10745
	chrX	3073668	3073870	203	Intron (FBtr0309500/FBgn0028369, intron 6 of 10)	-6106	323.546	4.10745
	chrX	3083393	3083556	164	Intron (FBtr0309500/FBgn0028369, intron 6 of 10)	-15831	218.343	4.10745
	chrX	3085958	3086141	184	Intron (FBtr0309500/FBgn0028369, intron 6 of 10)	-13409	183.202	3.68547
	chrX	3087256	3087339	84	Intron (FBtr0309500/FBgn0028369, intron 6 of 10)	-12211	176.831	3.69778
	chrX	3097059	3097363	305	Promoter (2-3kb)	-2187	2446.06	4.10745
	chrX	3121552	3121881	330	Intron (FBtr0309500/FBgn0028369, intron 6 of 10)	-6758	156.448	2.8561
	chrX	3122518	3122847	330	Intron (FBtr0309500/FBgn0028369, intron 6 of 10)	-5792	148.318	2.47993
	chrX	3134613	3134878	266	Promoter (<=1kb)	0	627.214	4.10745
	chrX	3136748	3137077	330	Promoter (1-2kb)	1878	232.351	4.10745
	chrX	3157264	3157593	330	Intron (FBtr0304659/FBgn0004647, intron 4 of 8)	15547	248.505	4.10745
	chrX	3162363	3162703	341	Intron (FBtr0304659/FBgn0004647, intron 5 of 8)	10437	2294.44	4.10745
	chrX	3188558	3188680	123	Intron (FBtr0070509/FBgn0000479, intron 1 of 14)	12118	240.83	4.10745
	chrX	3193905	3194066	162	Intron (FBtr0070509/FBgn0000479, intron 1 of 14)	17465	280.835	4.10745
	chrX	3205988	3206132	145	Intron (FBtr0070509/FBgn0000479, intron 1 of 14)	29548	214.428	4.10745
	chrX	3255718	3255896	179	Promoter (<=1kb)	-172	285.604	4.10745
	chrX	3288933	3289077	145	Promoter (<=1kb)	-304	205.311	3.64657
	chrX	3294853	3295154	302	Promoter (<=1kb)	-127	2518.96	4.10745
	chrX	3297466	3297795	330	Promoter (2-3kb)	2185	187.775	3.67618
	chrX	3310900	3311138	239	Intron (FBtr0070509/FBgn0000479, intron 4 of 14)	-3041	807.361	4.10745
	chrX	3329018	3329154	137	Promoter (<=1kb)	-253	209.287	3.63772
	chrX	3351160	3351279	120	Promoter (2-3kb)	-2760	259.605	4.10745
	chrX	3357965	3358294	330	Distal Intergenic	-5392	153.558	2.76268
	chrX	3358989	3359112	124	Distal Intergenic	-4574	206.026	3.64473
	chrX	3360443	3360591	149	Distal Intergenic	-3095	234.23	4.10745
	chrX	3363784	3363954	171	Promoter (<=1kb)	98	389.298	4.10745
	chrX	3380178	3380507	330	Intron (FBtr0070525/FBgn0262656, intron 2 of 2)	7019	144.988	2.45758
	chrX	3381106	3381264	159	Intron (FBtr0070525/FBgn0262656, intron 2 of 2)	7947	250.399	4.10745
	chrX	3381793	3382024	232	Intron (FBtr0070525/FBgn0262656, intron 2 of 2)	8634	818.419	4.10745
	chrX	3394234	3394387	154	Intron (FBtr0344076/FBgn0266350, intron 2 of 3)	21075	301.361	4.10745
	chrX	3396961	3397105	145	Intron (FBtr0344076/FBgn0266350, intron 2 of 3)	23802	216.484	4.10745
	chrX	3403543	3403702	160	Intron (FBtr0344076/FBgn0266350, intron 2 of 3)	23821	286.739	4.10745
	chrX	3408078	3408169	92	Intron (FBtr0344076/FBgn0266350, intron 2 of 3)	19354	279.967	4.10745
	chrX	3425039	3425269	231	Promoter (2-3kb)	2254	836.926	4.10745
	chrX	3427636	3427874	239	Promoter (<=1kb)	-113	619	4.10745
	chrX	3433071	3433193	123	Promoter (2-3kb)	2614	236.99	4.10745
	chrX	3454842	3454991	150	Intron (FBtr0344076/FBgn0266350, intron 3 of 3)	5249	164.707	3.15735
	chrX	3455471	3455800	330	Intron (FBtr0344076/FBgn0266350, intron 3 of 3)	4440	227.408	4.10745
	chrX	3476131	3476300	170	Promoter (1-2kb)	-1607	278.892	4.10745
	chrX	3482696	3482962	267	Promoter (<=1kb)	-3	583.104	4.10745
	chrX	3485272	3485601	330	Promoter (<=1kb)	0	143.487	2.41971
	chrX	3548721	3548840	120	Promoter (2-3kb)	-2611	195.742	3.66348
	chrX	3564585	3564688	104	Intron (FBtr0307179/FBgn0052792, intron 2 of 5)	-4816	169.74	3.34403
	chrX	3570182	3570511	330	Promoter (<=1kb)	678	256.958	4.10745
	chrX	3573561	3573744	184	Promoter (<=1kb)	0	495.75	4.10745
	chrX	3657840	3658169	330	Intron (FBtr0070575/FBgn0266429, intron 6 of 10)	-9452	182.579	3.68679
	chrX	3671580	3671684	105	Promoter (<=1kb)	-78	369.867	4.10745
	chrX	3677582	3677911	330	Intron (FBtr0301821/FBgn0023215, intron 1 of 8)	5781	242.721	4.10745
	chrX	3682234	3682444	211	Intron (FBtr0301821/FBgn0023215, intron 1 of 8)	-5791	527.478	4.10745
	chrX	3686974	3687226	253	Promoter (1-2kb)	-1009	991.426	4.10745
	chrX	3687862	3688092	231	Promoter (<=1kb)	-143	909.536	4.10745
	chrX	3690680	3690881	202	Promoter (1-2kb)	1317	433.78	4.10745
	chrX	3691581	3691910	330	Promoter (2-3kb)	2218	269.68	4.10745
	chrX	3692218	3692447	230	Promoter (2-3kb)	2855	755.491	4.10745
	chrX	3694292	3694481	190	Intron (FBtr0301821/FBgn0023215, intron 3 of 8)	4929	280.204	4.10745
	chrX	3696677	3696852	176	Intron (FBtr0301821/FBgn0023215, intron 3 of 8)	-5005	389.253	4.10745
	chrX	3714144	3714314	171	Intron (FBtr0070584/FBgn0015286, intron 1 of 5)	5321	331.068	4.10745
	chrX	3719571	3720033	463	Promoter (<=1kb)	0	800.601	4.10745
	chrX	3720467	3720796	330	Promoter (<=1kb)	460	160.548	2.97829
	chrX	3731015	3731113	99	Intron (FBtr0301659/FBgn0283657, intron 2 of 8)	6378	170.94	3.3416
	chrX	3739170	3739499	330	Promoter (<=1kb)	-398	154.126	2.82574
	chrX	3741158	3741487	330	Promoter (1-2kb)	1261	141.125	2.3534
	chrX	3742047	3742384	338	Promoter (2-3kb)	2150	3409.15	4.10745
	chrX	3742962	3743291	330	Intron (FBtr0301659/FBgn0283657, intron 2 of 8)	3065	209.64	3.63706
	chrX	3743513	3743814	302	Intron (FBtr0301659/FBgn0283657, intron 2 of 8)	-3349	1192.25	4.10745
	chrX	3744423	3744752	330	Promoter (2-3kb)	-2411	174.41	3.48038
	chrX	3745283	3745469	187	Promoter (1-2kb)	-1694	354.767	4.10745
	chrX	3748307	3748493	187	Promoter (<=1kb)	-568	335.372	4.10745
	chrX	3750567	3750856	290	Promoter (1-2kb)	1506	1309.95	4.10745
	chrX	3773446	3773542	97	Promoter (<=1kb)	806	140.96	2.35379
	chrX	3774336	3774568	233	Promoter (1-2kb)	-1491	623.413	4.10745
	chrX	3777337	3777443	107	Promoter (<=1kb)	0	366.38	4.10745
	chrX	3781130	3781218	89	Promoter (<=1kb)	987	387.55	4.10745
	chrX	3798900	3799229	330	Promoter (<=1kb)	0	173.667	3.48182
	chrX	3811384	3811546	163	Promoter (<=1kb)	-152	489.861	4.10745
	chrX	3832281	3832610	330	Intron (FBtr0112801/FBgn0000542, intron 2 of 5)	-3470	173.15	3.48302
	chrX	3837680	3838009	330	Promoter (1-2kb)	1600	145.421	2.45664
	chrX	3838672	3838908	237	Promoter (2-3kb)	2592	640.398	4.10745
	chrX	3862676	3862771	96	Promoter (<=1kb)	0	340.882	4.10745
	chrX	3867073	3867402	330	Promoter (<=1kb)	-356	176.573	3.69842
	chrX	3868513	3868782	270	Promoter (<=1kb)	-182	1144.96	4.10745
	chrX	3880602	3880763	162	Promoter (<=1kb)	0	243.677	4.10745
	chrX	3931770	3931938	169	Promoter (1-2kb)	-1192	276.027	4.10745
	chrX	3936232	3936561	330	Promoter (<=1kb)	0	168.043	3.23858
	chrX	3968817	3968992	176	Promoter (<=1kb)	0	383.52	4.10745
	chrX	4005161	4005317	157	Distal Intergenic	-3554	279.066	4.10745
	chrX	4010308	4010462	155	Distal Intergenic	-8701	205.245	3.6467
	chrX	4010930	4011155	226	Distal Intergenic	-9323	652.887	4.10745
	chrX	4013010	4013172	163	Distal Intergenic	-11403	240.939	4.10745
	chrX	4033722	4033873	152	Distal Intergenic	15331	208.009	3.64071
	chrX	4038814	4039143	330	Distal Intergenic	10061	192.422	3.66798
	chrX	4101013	4101133	121	Promoter (<=1kb)	0	353.888	4.10745
	chrX	4105753	4106136	384	Promoter (<=1kb)	0	942.577	4.10745
	chrX	4106750	4107079	330	Promoter (<=1kb)	0	309.366	4.10745
	chrX	4113567	4113896	330	Promoter (<=1kb)	0	255.305	4.10745
	chrX	4116870	4116997	128	Promoter (<=1kb)	0	310.328	4.10745
	chrX	4131059	4131388	330	Promoter (<=1kb)	0	270.559	4.10745
	chrX	4170601	4170759	159	Intron (FBtr0336884/FBgn0000635, intron 2 of 9)	35334	200.338	3.65517
	chrX	4172273	4172456	184	Intron (FBtr0336884/FBgn0000635, intron 2 of 9)	33637	385.623	4.10745
	chrX	4202518	4202655	138	Intron (FBtr0336884/FBgn0000635, intron 2 of 9)	3438	225.551	4.10745
	chrX	4205925	4206254	330	Promoter (<=1kb)	0	279.353	4.10745
	chrX	4262765	4262974	210	Distal Intergenic	-3123	542.847	4.10745
	chrX	4264401	4264572	172	Promoter (1-2kb)	-1525	232.299	4.10745
	chrX	4322348	4322677	330	Promoter (<=1kb)	0	283.452	4.10745
	chrX	4324132	4324285	154	Promoter (<=1kb)	523	188.895	3.67446
	chrX	4324832	4325147	316	Promoter (1-2kb)	1223	2806.43	4.10745
	chrX	4329850	4330179	330	Promoter (<=1kb)	-393	178.587	3.69417
	chrX	4366253	4366455	203	Promoter (<=1kb)	0	685.821	4.10745
	chrX	4377735	4377864	130	Promoter (1-2kb)	1827	214.485	4.10745
	chrX	4446155	4446391	237	Intron (FBtr0070672/FBgn0000179, intron 2 of 7)	19020	918.234	4.10745
	chrX	4458046	4458168	123	Intron (FBtr0070672/FBgn0000179, intron 4 of 7)	30911	351.754	4.10745
	chrX	4459788	4459932	145	Intron (FBtr0070672/FBgn0000179, intron 4 of 7)	32653	149.659	2.5253
	chrX	4498364	4498565	202	Intron (FBtr0344480/FBgn0052773, intron 2 of 4)	-31666	475.318	4.10745
	chrX	4503550	4503879	330	Intron (FBtr0344480/FBgn0052773, intron 2 of 4)	-26352	184.252	3.68326
	chrX	4505439	4505605	167	Intron (FBtr0344480/FBgn0052773, intron 2 of 4)	-24626	233.701	4.10745
	chrX	4507203	4507429	227	Intron (FBtr0344480/FBgn0052773, intron 2 of 4)	-22802	640.664	4.10745
	chrX	4551768	4552097	330	Promoter (<=1kb)	0	208.598	3.63945
	chrX	4554129	4554364	236	Promoter (<=1kb)	0	738.262	4.10745
	chrX	4560337	4560437	101	Promoter (2-3kb)	2265	222.619	4.10745
	chrX	4565074	4565256	183	Intron (FBtr0344480/FBgn0052773, intron 1 of 4)	6673	362.464	4.10745
	chrX	4590034	4590348	315	Intron (FBtr0344480/FBgn0052773, intron 1 of 4)	-18105	1916.15	4.10745
	chrX	4590554	4590743	190	Intron (FBtr0344480/FBgn0052773, intron 1 of 4)	-18625	172.973	3.48382
	chrX	4609836	4610036	201	Promoter (1-2kb)	1349	386.012	4.10745
	chrX	4610480	4610809	330	Promoter (<=1kb)	576	145.396	2.45674
	chrX	4614969	4615298	330	Promoter (2-3kb)	-2266	216.197	4.10745
	chrX	4617124	4617235	112	Promoter (<=1kb)	-329	188.951	3.67422
	chrX	4649832	4650050	219	Promoter (<=1kb)	0	528.517	4.10745
	chrX	4666851	4667171	321	Promoter (<=1kb)	-151	1511.46	4.10745
	chrX	4684666	4684965	300	Promoter (1-2kb)	1938	789.015	4.10745
	chrX	4686898	4687050	153	Promoter (<=1kb)	0	277.93	4.10745
	chrX	4687843	4688067	225	Promoter (<=1kb)	43	556.62	4.10745
	chrX	4691305	4691487	183	Intron (FBtr0070704/FBgn0011760, intron 1 of 2)	3102	226.995	4.10745
	chrX	4693200	4693331	132	Intron (FBtr0070704/FBgn0011760, intron 2 of 2)	4997	238.344	4.10745
	chrX	4906673	4906900	228	Promoter (<=1kb)	0	473.228	4.10745
	chrX	4908925	4909254	330	Promoter (<=1kb)	0	141.799	2.36249
	chrX	4910043	4910494	452	Promoter (<=1kb)	941	2308.72	4.10745
	chrX	4918700	4918873	174	Promoter (<=1kb)	0	274.059	4.10745
	chrX	4919577	4919821	245	Promoter (<=1kb)	705	1097.87	4.10745
	chrX	4930033	4930362	330	Promoter (<=1kb)	-45	278.088	4.10745
	chrX	4936092	4936421	330	Promoter (<=1kb)	0	179.542	3.69217
	chrX	4937888	4938217	330	Promoter (<=1kb)	0	231.011	4.10745
	chrX	4939802	4940140	339	Promoter (<=1kb)	221	3045.47	4.10745
	chrX	4970009	4970199	191	Intron (FBtr0343542/FBgn0266096, intron 3 of 3)	-8881	298.308	4.10745
	chrX	4983269	4983598	330	Promoter (2-3kb)	-2073	161.234	3.03092
	chrX	4999034	4999363	330	Promoter (1-2kb)	1593	183.154	3.68571
	chrX	5038571	5038715	145	Intron (FBtr0343542/FBgn0266096, intron 2 of 3)	-9558	275.157	4.10745
	chrX	5041622	5041772	151	Intron (FBtr0343542/FBgn0266096, intron 2 of 3)	-6501	179.18	3.69323
	chrX	5046648	5046790	143	Promoter (1-2kb)	-1483	160.29	2.97861
	chrX	5082948	5083141	194	Promoter (<=1kb)	0	514.562	4.10745
	chrX	5083597	5083920	324	Promoter (<=1kb)	-572	1706.6	4.10745
	chrX	5084713	5084932	220	Promoter (<=1kb)	0	288.899	4.10745
	chrX	5086030	5086359	330	Promoter (<=1kb)	271	141.167	2.35321
	chrX	5086928	5087086	159	Promoter (1-2kb)	1169	291.531	4.10745
	chrX	5094032	5094231	200	Intron (FBtr0344650/FBgn0266098, intron 2 of 28)	8273	357.966	4.10745
	chrX	5095702	5095915	214	Intron (FBtr0344650/FBgn0266098, intron 2 of 28)	9943	386.048	4.10745
	chrX	5143934	5144117	184	Intron (FBtr0344650/FBgn0266098, intron 2 of 28)	12036	313.046	4.10745
	chrX	5289855	5289949	95	Distal Intergenic	-6117	178.381	3.69481
	chrX	5309018	5309224	207	Promoter (<=1kb)	-18	438.14	4.10745
	chrX	5336856	5336946	91	Distal Intergenic	-3290	261.87	4.10745
	chrX	5350015	5350189	175	Intron (FBtr0301950/FBgn0029761, intron 2 of 10)	-8083	325.12	4.10745
	chrX	5357188	5357286	99	Promoter (<=1kb)	-986	201.824	3.65254
	chrX	5419306	5419509	204	Promoter (<=1kb)	-210	308.112	4.10745
	chrX	5420825	5421046	222	Promoter (<=1kb)	0	498.964	4.10745
	chrX	5560541	5560870	330	Promoter (<=1kb)	-358	155.52	2.82209
	chrX	5564026	5564190	165	Distal Intergenic	-3843	371.031	4.10745
	chrX	5603146	5603252	107	Intron (FBtr0070781/FBgn0263511, intron 1 of 2)	8891	186.498	3.67861
	chrX	5604261	5604461	201	Intron (FBtr0070781/FBgn0263511, intron 1 of 2)	10006	530.145	4.10745
	chrX	5638664	5638869	206	Promoter (1-2kb)	-1070	374.779	4.10745
	chrX	5639163	5639364	202	Promoter (1-2kb)	-1569	363.774	4.10745
	chrX	5640330	5640659	330	Promoter (2-3kb)	-2736	167.962	3.2388
	chrX	5646376	5646526	151	Promoter (1-2kb)	1961	153.689	2.76242
	chrX	5648652	5648897	246	Promoter (<=1kb)	-165	747.95	4.10745
	chrX	5665913	5666100	188	Promoter (<=1kb)	0	473.709	4.10745
	chrX	5671671	5672000	330	Promoter (<=1kb)	0	300.347	4.10745
	chrX	5672535	5672693	159	Promoter (<=1kb)	-41	340.782	4.10745
	chrX	5677922	5678312	391	Promoter (<=1kb)	-964	1189.22	4.10745
	chrX	5679080	5679275	196	Promoter (<=1kb)	702	358.951	4.10745
	chrX	5695099	5695428	330	Promoter (<=1kb)	0	218.031	4.10745
	chrX	5696024	5696287	264	Promoter (<=1kb)	-819	217.599	4.10745
	chrX	5696379	5696671	293	Promoter (<=1kb)	-452	1178.87	4.10745
	chrX	5696693	5697032	340	Promoter (<=1kb)	-91	869.768	4.10745
	chrX	5700179	5700428	250	Promoter (<=1kb)	992	596.2	4.10745
	chrX	5705886	5706139	254	Intron (FBtr0301083/FBgn0029791, intron 6 of 11)	6699	949.622	4.10745
	chrX	5718733	5718856	124	Promoter (<=1kb)	-955	148.389	2.47978
	chrX	5724917	5725239	323	Promoter (1-2kb)	-1347	896.986	4.10745
	chrX	5735340	5735590	251	Promoter (2-3kb)	2441	792.557	4.10745
	chrX	5737124	5737453	330	Promoter (<=1kb)	578	181.247	3.68928
	chrX	5737961	5738276	316	Promoter (<=1kb)	0	1273.57	4.10745
	chrX	5745909	5746184	276	Promoter (<=1kb)	191	797.769	4.10745
	chrX	5747514	5747794	281	Promoter (<=1kb)	0	1030.06	4.10745
	chrX	5754948	5755103	156	Promoter (<=1kb)	0	235.945	4.10745
	chrX	5755327	5755616	290	Promoter (<=1kb)	0	757.997	4.10745
	chrX	5764027	5764319	293	Promoter (<=1kb)	0	421.369	4.10745
	chrX	5783773	5783986	214	Promoter (2-3kb)	-2153	529.384	4.10745
	chrX	5847623	5847785	163	Promoter (2-3kb)	2343	329.8	4.10745
	chrX	5866239	5866325	87	Promoter (1-2kb)	-1088	213.895	4.10745
	chrX	5879581	5879812	232	Promoter (<=1kb)	0	608.075	4.10745
	chrX	5880582	5880784	203	Promoter (<=1kb)	-35	425.154	4.10745
	chrX	5883462	5883664	203	Promoter (2-3kb)	2643	579.953	4.10745
	chrX	5887253	5887369	117	Intron (FBtr0346401/FBgn0267228, intron 1 of 2)	6434	207.277	3.6423
	chrX	5889110	5889228	119	Intron (FBtr0346401/FBgn0267228, intron 1 of 2)	8291	406.029	4.10745
	chrX	5892182	5892335	154	Intron (FBtr0346401/FBgn0267228, intron 1 of 2)	7654	246.086	4.10745
	chrX	5894736	5894833	98	Intron (FBtr0346401/FBgn0267228, intron 1 of 2)	5156	152.042	2.6841
	chrX	5896025	5896297	273	Intron (FBtr0346401/FBgn0267228, intron 1 of 2)	3692	1519.06	4.10745
	chrX	5897164	5897348	185	Promoter (2-3kb)	2641	414.331	4.10745
	chrX	5900012	5900608	597	Promoter (<=1kb)	-23	2774.67	4.10745
	chrX	5901755	5902084	330	Promoter (<=1kb)	0	183.6	3.6844
	chrX	5907962	5908207	246	Promoter (<=1kb)	0	854.126	4.10745
	chrX	5916652	5916981	330	Promoter (<=1kb)	0	140.374	2.33399
	chrX	5918758	5919076	319	Promoter (1-2kb)	1598	3784.72	4.10745
	chrX	5923254	5923419	166	Intron (FBtr0343051/FBgn0029824, intron 1 of 6)	6094	294.348	4.10745
	chrX	5924484	5924660	177	Intron (FBtr0343051/FBgn0029824, intron 1 of 6)	7324	300.299	4.10745
	chrX	5932509	5932602	94	Intron (FBtr0343051/FBgn0029824, intron 1 of 6)	-10004	144.174	2.44526
	chrX	5968166	5968390	225	Promoter (1-2kb)	1703	469.649	4.10745
	chrX	5969950	5970126	177	Intron (FBtr0070865/FBgn0029830, intron 1 of 9)	3487	283.079	4.10745
	chrX	5972130	5972326	197	Intron (FBtr0070865/FBgn0029830, intron 1 of 9)	5667	444.124	4.10745
	chrX	5973522	5973701	180	Intron (FBtr0070865/FBgn0029830, intron 1 of 9)	7059	355.53	4.10745
	chrX	5977304	5977411	108	Intron (FBtr0070865/FBgn0029830, intron 1 of 9)	10841	218.458	4.10745
	chrX	5980998	5981226	229	Intron (FBtr0070865/FBgn0029830, intron 2 of 9)	-7565	653.707	4.10745
	chrX	5989455	5989648	194	Promoter (<=1kb)	664	331.24	4.10745
	chrX	5992337	5992420	84	3' UTR	3546	332.64	4.10745
	chrX	6000950	6001172	223	Promoter (<=1kb)	-153	466.617	4.10745
	chrX	6020378	6020468	91	Distal Intergenic	6670	180.956	3.68987
	chrX	6024737	6024990	254	Distal Intergenic	11029	721.735	4.10745
	chrX	6031783	6032038	256	Distal Intergenic	5224	964.477	4.10745
	chrX	6035362	6035691	330	Promoter (1-2kb)	1571	244.273	4.10745
	chrX	6037248	6037500	253	Promoter (<=1kb)	0	424.897	4.10745
	chrX	6074936	6075152	217	Promoter (<=1kb)	-79	443.697	4.10745
	chrX	6090903	6091064	162	Promoter (<=1kb)	-141	239.08	4.10745
	chrX	6092243	6092572	330	Promoter (<=1kb)	473	174.546	3.48004
	chrX	6097653	6097898	246	Intron (FBtr0343930/FBgn0029843, intron 3 of 9)	3067	829.426	4.10745
	chrX	6179541	6179696	156	Intron (FBtr0334984/FBgn0264386, intron 2 of 26)	12787	230.206	4.10745
	chrX	6224275	6224511	237	Promoter (<=1kb)	9	429.877	4.10745
	chrX	6255628	6255957	330	Promoter (<=1kb)	0	146.211	2.46962
	chrX	6261021	6261145	125	Promoter (<=1kb)	-24	239.154	4.10745
	chrX	6263682	6263928	247	Promoter (2-3kb)	2513	401.362	4.10745
	chrX	6265436	6265789	354	Promoter (1-2kb)	1439	1126.79	4.10745
	chrX	6267499	6267692	194	Promoter (<=1kb)	-105	280.062	4.10745
	chrX	6287881	6288144	264	Promoter (<=1kb)	0	1151.96	4.10745
	chrX	6291165	6291367	203	Promoter (<=1kb)	0	543.921	4.10745
	chrX	6308820	6309149	330	Promoter (<=1kb)	-63	265.335	4.10745
	chrX	6310549	6310647	99	Promoter (1-2kb)	1337	258.4	4.10745
	chrX	6311572	6311685	114	Promoter (2-3kb)	2360	145.231	2.45714
	chrX	6316922	6317142	221	Promoter (<=1kb)	-279	473.918	4.10745
	chrX	6330422	6330790	369	Promoter (<=1kb)	-52	484.933	4.10745
	chrX	6339052	6339381	330	Promoter (<=1kb)	-115	221.953	4.10745
	chrX	6340093	6340320	228	Promoter (<=1kb)	597	460.778	4.10745
	chrX	6340731	6341060	330	Promoter (<=1kb)	-78	207.854	3.64098
	chrX	6344087	6344247	161	Promoter (2-3kb)	-2856	184.5	3.68272
	chrX	6346912	6347224	313	Promoter (<=1kb)	0	752.378	4.10745
	chrX	6350223	6350552	330	Promoter (<=1kb)	0	208.501	3.63979
	chrX	6352170	6352499	330	Promoter (<=1kb)	0	160.602	2.97807
	chrX	6353663	6353876	214	Promoter (1-2kb)	1381	435.947	4.10745
	chrX	6366407	6366614	208	Promoter (<=1kb)	458	672.086	4.10745
	chrX	6373017	6373213	197	Promoter (<=1kb)	-102	396.886	4.10745
	chrX	6375726	6375926	201	Promoter (2-3kb)	-2811	410.665	4.10745
	chrX	6376801	6377130	330	Distal Intergenic	-3886	146.585	2.46872
	chrX	6524286	6524563	278	Promoter (<=1kb)	0	857.262	4.10745
	chrX	6528661	6528787	127	Promoter (<=1kb)	-161	219.917	4.10745
	chrX	6533137	6533421	285	Promoter (<=1kb)	0	508.057	4.10745
	chrX	6542423	6542620	198	Promoter (1-2kb)	1652	328.773	4.10745
	chrX	6549750	6550048	299	Intron (FBtr0112703/FBgn0085446, intron 2 of 3)	3631	1432.9	4.10745
	chrX	6571568	6571754	187	Promoter (<=1kb)	-169	244.229	4.10745
	chrX	6590637	6590899	263	Promoter (<=1kb)	0	584.937	4.10745
	chrX	6599259	6599401	143	Promoter (<=1kb)	-661	372.136	4.10745
	chrX	6599938	6600267	330	Promoter (<=1kb)	0	156.148	2.85673
	chrX	6601237	6601392	156	Promoter (<=1kb)	-933	239.284	4.10745
	chrX	6601859	6602081	223	Promoter (<=1kb)	-244	521.636	4.10745
	chrX	6614399	6614561	163	Intron (FBtr0070948/FBgn0029881, intron 2 of 9)	12074	360.682	4.10745
	chrX	6615580	6615765	186	Intron (FBtr0070948/FBgn0029881, intron 2 of 9)	13255	361.048	4.10745
	chrX	6621628	6621822	195	Intron (FBtr0070948/FBgn0029881, intron 2 of 9)	-12137	262.922	4.10745
	chrX	6642963	6643172	210	Intron (FBtr0070948/FBgn0029881, intron 3 of 9)	5840	334.622	4.10745
	chrX	6654462	6654687	226	Promoter (<=1kb)	0	521.047	4.10745
	chrX	6656191	6656401	211	Promoter (1-2kb)	1512	559.94	4.10745
	chrX	6657081	6657207	127	Promoter (2-3kb)	2402	219.301	4.10745
	chrX	6661392	6661721	330	Promoter (<=1kb)	0	220.188	4.10745
	chrX	6663263	6663441	179	Promoter (1-2kb)	1616	257.758	4.10745
	chrX	6678185	6678514	330	Promoter (<=1kb)	0	191.252	3.66929
	chrX	6679224	6679513	290	Promoter (<=1kb)	-106	1601.71	4.10745
	chrX	6695031	6695193	163	Promoter (<=1kb)	-24	430.992	4.10745
	chrX	6695142	6695471	330	Promoter (<=1kb)	-135	163.788	3.08666
	chrX	6698393	6698722	330	Promoter (<=1kb)	0	156.081	2.8571
	chrX	6699308	6699413	106	Promoter (<=1kb)	-95	223.81	4.10745
	chrX	6702007	6702241	235	Promoter (2-3kb)	2499	413.405	4.10745
	chrX	6702276	6702433	158	Promoter (2-3kb)	2768	229.486	4.10745
	chrX	6705409	6705738	330	Intron (FBtr0332893/FBgn0029895, intron 2 of 8)	-3349	206.119	3.64421
	chrX	6706589	6706918	330	Promoter (2-3kb)	-2169	152.985	2.70816
	chrX	6711365	6711632	268	Promoter (2-3kb)	2278	999.341	4.10745
	chrX	6741159	6741405	247	Promoter (1-2kb)	1086	834.106	4.10745
	chrX	6744116	6744467	352	Promoter (<=1kb)	0	1269.93	4.10745
	chrX	6777527	6777660	134	Promoter (1-2kb)	1999	297.491	4.10745
	chrX	6793456	6793680	225	Promoter (1-2kb)	1708	660.56	4.10745
	chrX	6794259	6794512	254	Promoter (<=1kb)	876	1150.42	4.10745
	chrX	6794811	6795140	330	Promoter (<=1kb)	248	295.83	4.10745
	chrX	6796000	6796329	330	Promoter (<=1kb)	-422	154.426	2.82475
	chrX	6803539	6803759	221	Promoter (<=1kb)	0	622.491	4.10745
	chrX	6804749	6805010	262	Promoter (<=1kb)	0	982.128	4.10745
	chrX	6849521	6849758	238	Promoter (<=1kb)	-4	459.806	4.10745
	chrX	6852619	6852923	305	Promoter (<=1kb)	0	1388.16	4.10745
	chrX	6854626	6854787	162	Promoter (1-2kb)	-1731	286.092	4.10745
	chrX	6855367	6855598	232	Promoter (2-3kb)	-2472	236.532	4.10745
	chrX	6857727	6858056	330	Promoter (2-3kb)	-2283	145.22	2.45719
	chrX	6860767	6861096	330	Promoter (<=1kb)	428	148.289	2.48028
	chrX	6861885	6862048	164	Promoter (1-2kb)	1546	153.337	2.7633
	chrX	6863230	6863563	334	Promoter (<=1kb)	-325	1115.91	4.10745
	chrX	6866007	6866336	330	Promoter (<=1kb)	858	161.619	3.02968
	chrX	6867604	6867729	126	Promoter (<=1kb)	-410	165.679	3.15581
	chrX	6875812	6876141	330	Promoter (<=1kb)	0	157.965	2.93575
	chrX	6912399	6912509	111	Intron (FBtr0304108/FBgn0029922, intron 1 of 3)	4122	222.47	4.10745
	chrX	6937554	6937756	203	Intron (FBtr0304108/FBgn0029922, intron 2 of 3)	-12754	291.46	4.10745
	chrX	6942098	6942198	101	Intron (FBtr0304108/FBgn0029922, intron 2 of 3)	-8312	226.245	4.10745
	chrX	6968566	6968895	330	Promoter (<=1kb)	0	152.005	2.68415
	chrX	6969328	6969610	283	Promoter (<=1kb)	-308	1799.07	4.10745
	chrX	6973378	6973561	184	Promoter (<=1kb)	0	364.601	4.10745
	chrX	6982199	6982359	161	Promoter (<=1kb)	-516	322.703	4.10745
	chrX	6985272	6985488	217	Promoter (<=1kb)	180	347.482	4.10745
	chrX	6993871	6994055	185	Promoter (<=1kb)	-259	295.303	4.10745
	chrX	6998002	6998132	131	Promoter (<=1kb)	-203	148.647	2.49479
	chrX	7000775	7001104	330	Promoter (2-3kb)	2103	156.093	2.85699
	chrX	7004172	7004440	269	Downstream (<=300bp)	5500	950.268	4.10745
	chrX	7008695	7009024	330	Promoter (2-3kb)	2121	157.583	2.93675
	chrX	7011118	7011400	283	Promoter (<=1kb)	0	1067.81	4.10745
	chrX	7013643	7013891	249	Promoter (<=1kb)	0	704.915	4.10745
	chrX	7015159	7015322	164	Promoter (1-2kb)	1272	366.85	4.10745
	chrX	7063640	7063969	330	Promoter (2-3kb)	2083	179.965	3.69152
	chrX	7066644	7066973	330	Promoter (<=1kb)	-592	148.724	2.49448
	chrX	7095596	7095856	261	Promoter (1-2kb)	1210	908.64	4.10745
	chrX	7096521	7096798	278	Promoter (<=1kb)	268	872.314	4.10745
	chrX	7098015	7098328	314	Promoter (<=1kb)	0	790.863	4.10745
	chrX	7101611	7101909	299	Promoter (<=1kb)	391	465.487	4.10745
	chrX	7102187	7102516	330	Promoter (<=1kb)	0	201.006	3.65402
	chrX	7104312	7104641	330	Promoter (<=1kb)	0	162.384	3.02762
	chrX	7117899	7118117	219	Promoter (2-3kb)	2624	677.762	4.10745
	chrX	7120281	7120443	163	Promoter (<=1kb)	298	274.211	4.10745
	chrX	7122152	7122269	118	Promoter (1-2kb)	-1411	194.984	3.66449
	chrX	7141767	7142096	330	Intron (FBtr0339815/FBgn0029939, intron 1 of 4)	4044	177.73	3.69615
	chrX	7162635	7162793	159	Intron (FBtr0339815/FBgn0029939, intron 1 of 4)	-12785	257.49	4.10745
	chrX	7166404	7166587	184	Exon (FBtr0339821/FBgn0265457, exon 4 of 4)	-16554	338.773	4.10745
	chrX	7177247	7177415	169	Intron (FBtr0339815/FBgn0029939, intron 1 of 4)	-18614	297.459	4.10745
	chrX	7204168	7204497	330	Intron (FBtr0339815/FBgn0029939, intron 2 of 4)	8139	149.354	2.52586
	chrX	7241986	7242214	229	Intron (FBtr0339821/FBgn0265457, intron 3 of 3)	15531	516.273	4.10745
	chrX	7277128	7277343	216	Intron (FBtr0339821/FBgn0265457, intron 3 of 3)	7534	505.279	4.10745
	chrX	7280104	7280433	330	Intron (FBtr0339821/FBgn0265457, intron 2 of 3)	4444	146.984	2.46792
	chrX	7285985	7286566	582	Promoter (<=1kb)	0	19306.6	4.10745
	chrX	7286603	7286939	337	Promoter (<=1kb)	0	668.329	4.10745
	chrX	7291193	7291511	319	Promoter (<=1kb)	0	1514.76	4.10745
	chrX	7291963	7292081	119	Promoter (<=1kb)	-665	222.726	4.10745
	chrX	7293125	7293443	319	Promoter (1-2kb)	-1827	1826.69	4.10745
	chrX	7293580	7293878	299	Promoter (2-3kb)	-2282	1433.9	4.10745
	chrX	7294176	7294476	301	Promoter (2-3kb)	-2878	153.857	2.76175
	chrX	7299365	7299694	330	Intron (FBtr0339821/FBgn0265457, intron 2 of 3)	-8067	187.416	3.67691
	chrX	7300437	7300553	117	Intron (FBtr0339821/FBgn0265457, intron 2 of 3)	-7386	261.914	4.10745
	chrX	7301588	7301760	173	Intron (FBtr0339821/FBgn0265457, intron 2 of 3)	-6179	190.82	3.67015
	chrX	7301830	7301976	147	Intron (FBtr0339821/FBgn0265457, intron 2 of 3)	-5963	141.081	2.3536
	chrX	7302432	7302610	179	Intron (FBtr0339821/FBgn0265457, intron 2 of 3)	-5329	233.041	4.10745
	chrX	7305981	7306107	127	Promoter (1-2kb)	-1832	200.802	3.65459
	chrX	7306976	7307286	311	Promoter (<=1kb)	-653	494.641	4.10745
	chrX	7318558	7318887	330	Intron (FBtr0339821/FBgn0265457, intron 2 of 3)	4883	190.388	3.67096
	chrX	7319116	7319389	274	Intron (FBtr0339821/FBgn0265457, intron 2 of 3)	4381	374.251	4.10745
	chrX	7323718	7323910	193	Promoter (<=1kb)	0	429.188	4.10745
	chrX	7324855	7325190	336	Promoter (<=1kb)	641	1267.65	4.10745
	chrX	7332640	7332835	196	Promoter (<=1kb)	-449	383.831	4.10745
	chrX	7333288	7333471	184	Promoter (1-2kb)	-1097	404.498	4.10745
	chrX	7334875	7334961	87	Promoter (2-3kb)	-2391	197.973	3.65944
	chrX	7335525	7335764	240	Promoter (1-2kb)	-1588	433.998	4.10745
	chrX	7336178	7336512	335	Promoter (<=1kb)	-840	2230.1	4.10745
	chrX	7336889	7337221	333	Promoter (<=1kb)	-131	2748.55	4.10745
	chrX	7338595	7338847	253	Promoter (<=1kb)	889	545.043	4.10745
	chrX	7343080	7343409	330	Intron (FBtr0339821/FBgn0265457, intron 2 of 3)	4097	158.663	2.93378
	chrX	7379604	7379933	330	Promoter (1-2kb)	1464	169.996	3.34341
	chrX	7415135	7415299	165	Promoter (1-2kb)	1266	269.48	4.10745
	chrX	7432868	7432974	107	Distal Intergenic	-7125	161.552	3.02984
	chrX	7475384	7475713	330	Distal Intergenic	-11839	151.377	2.61636
	chrX	7488344	7488498	155	Promoter (<=1kb)	792	330.232	4.10745
	chrX	7503469	7503596	128	Distal Intergenic	3026	145.414	2.45669
	chrX	7519941	7520099	159	Intron (FBtr0071083/FBgn0052719, intron 2 of 7)	-8205	211.905	3.63303
	chrX	7527046	7527375	330	Promoter (<=1kb)	-929	202.423	3.65118
	chrX	7534966	7535165	200	Promoter (1-2kb)	1794	314.405	4.10745
	chrX	7544013	7544184	172	Intron (FBtr0071083/FBgn0052719, intron 2 of 7)	3808	260.084	4.10745
	chrX	7552223	7552431	209	Distal Intergenic	-3347	390.28	4.10745
	chrX	7553559	7553643	85	Promoter (2-3kb)	-2135	279.471	4.10745
	chrX	7556365	7556562	198	Promoter (<=1kb)	587	346.189	4.10745
	chrX	7571282	7571504	223	Promoter (2-3kb)	-2786	429.178	4.10745
	chrX	7579960	7580047	88	Distal Intergenic	5670	285.417	4.10745
	chrX	7601055	7601144	90	Distal Intergenic	-7284	141.956	2.37372
	chrX	7618275	7618530	256	Intron (FBtr0331733/FBgn0004198, intron 1 of 6)	9127	970.938	4.10745
	chrX	7637135	7637464	330	Intron (FBtr0331733/FBgn0004198, intron 1 of 6)	4913	160.668	2.97791
	chrX	7651671	7651879	209	Intron (FBtr0331733/FBgn0004198, intron 2 of 6)	19449	574.183	4.10745
	chrX	7657476	7657805	330	Intron (FBtr0331733/FBgn0004198, intron 2 of 6)	21816	154.339	2.82517
	chrX	7666671	7667000	330	Intron (FBtr0331733/FBgn0004198, intron 5 of 6)	12621	188.698	3.67483
	chrX	7678894	7679025	132	Promoter (<=1kb)	596	327.487	4.10745
	chrX	7691288	7691617	330	Intron (FBtr0310287/FBgn0029504, intron 1 of 5)	3301	156.575	2.85557
	chrX	7692057	7692219	163	Promoter (2-3kb)	2699	293.794	4.10745
	chrX	7692793	7692992	200	Promoter (1-2kb)	1926	431.686	4.10745
	chrX	7696987	7697177	191	Promoter (<=1kb)	-283	465.939	4.10745
	chrX	7698272	7698527	256	Promoter (1-2kb)	-1568	850.442	4.10745
	chrX	7700247	7700564	318	Intron (FBtr0310287/FBgn0029504, intron 1 of 5)	-3543	1802.52	4.10745
	chrX	7701719	7701875	157	Intron (FBtr0310287/FBgn0029504, intron 1 of 5)	3088	227.121	4.10745
	chrX	7703680	7703927	248	Promoter (1-2kb)	1036	483.708	4.10745
	chrX	7705491	7705751	261	Promoter (<=1kb)	-528	601.658	4.10745
	chrX	7706835	7707133	299	Promoter (<=1kb)	-642	978.455	4.10745
	chrX	7707484	7707605	122	Promoter (<=1kb)	-170	273.705	4.10745
	chrX	7708981	7709166	186	Promoter (<=1kb)	219	338.925	4.10745
	chrX	7710813	7711073	261	Promoter (1-2kb)	-1428	581.555	4.10745
	chrX	7721983	7722157	175	Promoter (<=1kb)	0	448.696	4.10745
	chrX	7734613	7734701	89	Promoter (<=1kb)	0	330.374	4.10745
	chrX	7735376	7735705	330	Promoter (<=1kb)	453	212.848	3.63087
	chrX	7737236	7737425	190	Promoter (<=1kb)	0	518.701	4.10745
	chrX	7741781	7742110	330	Distal Intergenic	4420	142.289	2.39694
	chrX	7760995	7761324	330	Distal Intergenic	-3658	170.877	3.34177
	chrX	7893801	7893945	145	Promoter (<=1kb)	-3	207.492	3.64164
	chrX	7901277	7901470	194	Promoter (<=1kb)	0	269.768	4.10745
	chrX	7901717	7901920	204	Promoter (<=1kb)	0	386.402	4.10745
	chrX	7908566	7908842	277	Promoter (<=1kb)	-89	1094.13	4.10745
	chrX	7920175	7920427	253	Promoter (<=1kb)	0	1012.85	4.10745
	chrX	7931262	7931591	330	Promoter (<=1kb)	0	215.639	4.10745
	chrX	7933286	7933469	184	Promoter (<=1kb)	0	253.171	4.10745
	chrX	7934751	7934975	225	Promoter (<=1kb)	0	513.089	4.10745
	chrX	7935871	7936018	148	Promoter (<=1kb)	0	497.685	4.10745
	chrX	7938268	7938597	330	Promoter (2-3kb)	2372	179.733	3.69194
	chrX	7944897	7945226	330	Promoter (<=1kb)	-212	230.115	4.10745
	chrX	7945359	7945688	330	Promoter (<=1kb)	-674	187.937	3.67581
	chrX	7968168	7968497	330	Promoter (<=1kb)	0	287.209	4.10745
	chrX	7969389	7969718	330	Promoter (<=1kb)	0	225.804	4.10745
	chrX	7970507	7970658	152	Promoter (<=1kb)	804	249.053	4.10745
	chrX	7972411	7972684	274	Promoter (2-3kb)	2708	1418.22	4.10745
	chrX	7975948	7976136	189	Intron (FBtr0301679/FBgn0003447, intron 1 of 5)	6245	340.383	4.10745
	chrX	7977185	7977514	330	Intron (FBtr0301679/FBgn0003447, intron 1 of 5)	7482	246.947	4.10745
	chrX	7978226	7978372	147	Intron (FBtr0301679/FBgn0003447, intron 1 of 5)	8523	273.152	4.10745
	chrX	7986573	7986902	330	3' UTR	-8795	167.658	3.23924
	chrX	7995300	7995629	330	Promoter (<=1kb)	-68	148.836	2.49423
	chrX	8058405	8058734	330	Promoter (<=1kb)	-47	190.787	3.67028
	chrX	8061393	8061730	338	Promoter (<=1kb)	0	1367.23	4.10745
	chrX	8085631	8085748	118	Promoter (1-2kb)	1375	230.339	4.10745
	chrX	8091033	8091295	263	Promoter (<=1kb)	818	1408.78	4.10745
	chrX	8092369	8092619	251	Promoter (<=1kb)	-256	409.799	4.10745
	chrX	8093980	8094211	232	Promoter (<=1kb)	0	496.839	4.10745
	chrX	8100122	8100306	185	Promoter (<=1kb)	-51	313.34	4.10745
	chrX	8101554	8101800	247	Promoter (<=1kb)	-100	1031.27	4.10745
	chrX	8113503	8113696	194	Promoter (2-3kb)	2451	471.696	4.10745
	chrX	8114593	8114716	124	Promoter (1-2kb)	1431	277.681	4.10745
	chrX	8116126	8116212	87	Promoter (<=1kb)	0	264.314	4.10745
	chrX	8121016	8121345	330	Promoter (<=1kb)	0	221.522	4.10745
	chrX	8122803	8123132	330	Promoter (1-2kb)	-1656	246.267	4.10745
	chrX	8126228	8126461	234	Promoter (2-3kb)	2824	733.153	4.10745
	chrX	8129756	8129867	112	Promoter (<=1kb)	0	298.624	4.10745
	chrX	8131901	8132230	330	Promoter (<=1kb)	-55	232.473	4.10745
	chrX	8141404	8141733	330	Promoter (<=1kb)	546	240.572	4.10745
	chrX	8142206	8142404	199	Promoter (<=1kb)	0	423.722	4.10745
	chrX	8143624	8143873	250	Promoter (<=1kb)	0	676.339	4.10745
	chrX	8145501	8145830	330	Promoter (<=1kb)	0	162.252	3.028
	chrX	8157325	8157628	304	Promoter (<=1kb)	0	940.955	4.10745
	chrX	8178209	8178538	330	Promoter (<=1kb)	-11	144.494	2.45853
	chrX	8196913	8197128	216	Intron (FBtr0100376/FBgn0261873, intron 4 of 16)	3713	579.554	4.10745
	chrX	8202759	8203088	330	Intron (FBtr0100376/FBgn0261873, intron 4 of 16)	9559	145.286	2.45689
	chrX	8207193	8207342	150	Intron (FBtr0100376/FBgn0261873, intron 5 of 16)	-8787	334.164	4.10745
	chrX	8212236	8212328	93	Intron (FBtr0100376/FBgn0261873, intron 7 of 16)	-3801	188.663	3.67489
	chrX	8230029	8230235	207	Promoter (<=1kb)	-379	452.776	4.10745
	chrX	8242410	8242495	86	Promoter (<=1kb)	-33	271.833	4.10745
	chrX	8244288	8244617	330	Promoter (<=1kb)	99	162.967	3.02637
	chrX	8252297	8252626	330	Promoter (<=1kb)	-44	185.264	3.68121
	chrX	8255042	8255204	163	Promoter (2-3kb)	2372	171.325	3.34087
	chrX	8259979	8260155	177	Intron (FBtr0071170/FBgn0030027, intron 1 of 7)	7309	301.087	4.10745
	chrX	8265302	8265631	330	Intron (FBtr0071170/FBgn0030027, intron 2 of 7)	5778	154.422	2.8248
	chrX	8273257	8273586	330	Promoter (<=1kb)	0	251.758	4.10745
	chrX	8273759	8274088	330	Promoter (<=1kb)	0	143.047	2.40797
	chrX	8398612	8398955	344	Promoter (<=1kb)	0	1366.92	4.10745
	chrX	8407243	8407396	154	Promoter (<=1kb)	0	440.542	4.10745
	chrX	8407717	8408046	330	Promoter (<=1kb)	-454	141.637	2.36303
	chrX	8409088	8409417	330	Promoter (<=1kb)	0	143.808	2.41897
	chrX	8411470	8411799	330	Promoter (<=1kb)	0	219.29	4.10745
	chrX	8436803	8437055	253	Promoter (<=1kb)	-2	468.276	4.10745
	chrX	8442229	8442558	330	Promoter (<=1kb)	0	155.134	2.82303
	chrX	8445194	8445523	330	Promoter (2-3kb)	-2846	233.024	4.10745
	chrX	8455275	8455573	299	Promoter (<=1kb)	-206	2114.59	4.10745
	chrX	8459509	8459838	330	Promoter (1-2kb)	1060	185.805	3.67982
	chrX	8464461	8464669	209	Promoter (<=1kb)	-23	403.482	4.10745
	chrX	8491477	8491806	330	Promoter (<=1kb)	132	143.686	2.41936
	chrX	8492962	8493196	235	Promoter (1-2kb)	1617	658.756	4.10745
	chrX	8493551	8493734	184	Promoter (2-3kb)	2206	366.3	4.10745
	chrX	8517109	8517401	293	Promoter (<=1kb)	0	819.69	4.10745
	chrX	8536741	8537070	330	Intron (FBtr0071209/FBgn0264975, intron 3 of 7)	-7043	232.761	4.10745
	chrX	8538248	8538468	221	Intron (FBtr0071209/FBgn0264975, intron 3 of 7)	-8550	640.997	4.10745
	chrX	8539152	8539275	124	Intron (FBtr0071209/FBgn0264975, intron 3 of 7)	-9454	215.552	4.10745
	chrX	8560442	8560686	245	Promoter (<=1kb)	0	470.338	4.10745
	chrX	8561451	8561613	163	Promoter (<=1kb)	-82	463.895	4.10745
	chrX	8573912	8574072	161	Promoter (<=1kb)	-234	206.463	3.64362
	chrX	8574879	8574979	101	Promoter (<=1kb)	573	302.976	4.10745
	chrX	8583203	8583532	330	Intron (FBtr0071214/FBgn0030052, intron 2 of 9)	-5279	151.687	2.63762
	chrX	8588670	8588923	254	Promoter (<=1kb)	0	861.126	4.10745
	chrX	8606265	8606482	218	Promoter (<=1kb)	0	482.815	4.10745
	chrX	8608738	8609067	330	Promoter (2-3kb)	-2434	146.653	2.46857
	chrX	8624894	8625223	330	Distal Intergenic	17953	227.627	4.10745
	chrX	8627242	8627516	275	Distal Intergenic	15660	1218.38	4.10745
	chrX	8650856	8651185	330	Promoter (<=1kb)	-175	204.377	3.64794
	chrX	8656638	8656880	243	Distal Intergenic	-5957	1065.06	4.10745
	chrX	8669536	8669664	129	Distal Intergenic	-7399	222.609	4.10745
	chrX	8670717	8670849	133	Distal Intergenic	-6214	194.174	3.66586
	chrX	8671442	8671619	178	Distal Intergenic	-5444	262.673	4.10745
	chrX	8676857	8677099	243	Promoter (<=1kb)	0	843.168	4.10745
	chrX	8677577	8677712	136	Promoter (<=1kb)	514	198.449	3.65823
	chrX	8681228	8681547	320	Promoter (<=1kb)	0	1819.47	4.10745
	chrX	8690087	8690323	237	Promoter (<=1kb)	0	471.167	4.10745
	chrX	8709282	8709587	306	Promoter (<=1kb)	-65	2222.29	4.10745
	chrX	8714661	8714961	301	Promoter (<=1kb)	0	641.579	4.10745
	chrX	8720137	8720466	330	Promoter (<=1kb)	0	385.075	4.10745
	chrX	8720384	8720527	144	Promoter (<=1kb)	0	290.362	4.10745
	chrX	8723576	8723905	330	Promoter (<=1kb)	-769	145.997	2.47012
	chrX	8730422	8730584	163	Distal Intergenic	5748	257.106	4.10745
	chrX	8754834	8754993	160	Distal Intergenic	30160	231.852	4.10745
	chrX	8755451	8755635	185	Distal Intergenic	29718	313.013	4.10745
	chrX	8774127	8774377	251	Intron (FBtr0331732/FBgn0026411, intron 1 of 4)	10976	1041.39	4.10745
	chrX	8777232	8777350	119	Intron (FBtr0331732/FBgn0026411, intron 1 of 4)	8003	148.478	2.47958
	chrX	8800487	8800665	179	Intron (FBtr0071279/FBgn0026411, intron 1 of 6)	5139	389.282	4.10745
	chrX	8805677	8806006	330	Promoter (<=1kb)	0	153.276	2.7634
	chrX	8830225	8830365	141	Distal Intergenic	-4941	227.854	4.10745
	chrX	8835249	8835346	98	Promoter (<=1kb)	0	148.261	2.48039
	chrX	8837293	8837462	170	Promoter (<=1kb)	-861	303.55	4.10745
	chrX	8861359	8861557	199	Promoter (2-3kb)	-2552	433.877	4.10745
	chrX	8863489	8863606	118	Promoter (<=1kb)	-503	235.877	4.10745
	chrX	8879047	8879245	199	Promoter (<=1kb)	-322	223.818	4.10745
	chrX	8887521	8887850	330	Intron (FBtr0071269/FBgn0011661, intron 1 of 6)	3957	149.042	2.49393
	chrX	8891115	8891251	137	Promoter (<=1kb)	556	230.099	4.10745
	chrX	8891951	8892167	217	Promoter (<=1kb)	-144	443.896	4.10745
	chrX	8894361	8894560	200	Promoter (<=1kb)	-166	410.055	4.10745
	chrX	8896152	8896427	276	Promoter (1-2kb)	1573	1860.65	4.10745
	chrX	8898249	8898450	202	Promoter (<=1kb)	0	338.616	4.10745
	chrX	8906894	8906980	87	Promoter (<=1kb)	-88	317.173	4.10745
	chrX	8973347	8973453	107	Promoter (<=1kb)	802	190.983	3.66953
	chrX	8974294	8974526	233	Promoter (<=1kb)	-39	644.363	4.10745
	chrX	9040913	9041242	330	Promoter (1-2kb)	1238	256.795	4.10745
	chrX	9042126	9042244	119	Promoter (<=1kb)	-400	185.192	3.68145
	chrX	9042718	9042885	168	Promoter (<=1kb)	74	343.214	4.10745
	chrX	9047098	9047280	183	Promoter (1-2kb)	1711	297.35	4.10745
	chrX	9048523	9048727	205	Promoter (<=1kb)	264	480.051	4.10745
	chrX	9060135	9060403	269	Promoter (<=1kb)	742	967.135	4.10745
	chrX	9067248	9067348	101	Promoter (<=1kb)	635	153.211	2.73465
	chrX	9068975	9069100	126	Promoter (<=1kb)	-641	256.328	4.10745
	chrX	9081121	9081324	204	Promoter (<=1kb)	0	333.878	4.10745
	chrX	9089339	9089538	200	Promoter (<=1kb)	0	354.939	4.10745
	chrX	9089908	9090300	393	Promoter (<=1kb)	395	1345.38	4.10745
	chrX	9106959	9107113	155	Promoter (<=1kb)	0	164.346	3.15828
	chrX	9109253	9109492	240	Promoter (<=1kb)	-58	438.456	4.10745
	chrX	9120922	9121107	186	Promoter (<=1kb)	-4	235.272	4.10745
	chrX	9127380	9127537	158	Intron (FBtr0333304/FBgn0030090, intron 1 of 3)	-6462	278.08	4.10745
	chrX	9132864	9133193	330	Promoter (1-2kb)	1847	171.276	3.34104
	chrX	9133455	9133784	330	Promoter (1-2kb)	1256	156.035	2.85731
	chrX	9135252	9135336	85	Promoter (<=1kb)	-153	141.399	2.36361
	chrX	9137259	9137457	199	Promoter (2-3kb)	-2160	341.171	4.10745
	chrX	9141301	9141528	228	Promoter (<=1kb)	437	794.499	4.10745
	chrX	9142439	9142540	102	Promoter (<=1kb)	0	229.539	4.10745
	chrX	9152084	9152413	330	Promoter (2-3kb)	2599	171.931	3.33996
	chrX	9156703	9156848	146	Promoter (<=1kb)	-34	272.519	4.10745
	chrX	9159977	9160079	103	Promoter (<=1kb)	0	206.573	3.64335
	chrX	9193693	9193887	195	Promoter (<=1kb)	-11	444.028	4.10745
	chrX	9196391	9196585	195	Promoter (<=1kb)	0	234.388	4.10745
	chrX	9201879	9202016	138	Promoter (<=1kb)	-59	178.888	3.69387
	chrX	9220569	9220750	182	Promoter (2-3kb)	2507	414.8	4.10745
	chrX	9247133	9247462	330	Promoter (<=1kb)	0	325.793	4.10745
	chrX	9248184	9248353	170	Promoter (<=1kb)	555	191.835	3.66848
	chrX	9250184	9250513	330	Promoter (<=1kb)	0	157.132	2.89408
	chrX	9251401	9251554	154	Promoter (<=1kb)	-655	329.872	4.10745
	chrX	9295627	9295838	212	Exon (FBtr0071320/FBgn0002576, exon 5 of 6)	10978	489.669	4.10745
	chrX	9317116	9317445	330	Promoter (1-2kb)	1778	186.83	3.67812
	chrX	9333176	9333336	161	Promoter (2-3kb)	-2689	274.477	4.10745
	chrX	9343914	9344082	169	Intron (FBtr0112753/FBgn0085478, intron 2 of 10)	12145	384.21	4.10745
	chrX	9344573	9344902	330	Intron (FBtr0112753/FBgn0085478, intron 2 of 10)	11325	153.64	2.76258
	chrX	9349298	9349515	218	Intron (FBtr0112753/FBgn0085478, intron 2 of 10)	6712	674.619	4.10745
	chrX	9352185	9352444	260	Intron (FBtr0112753/FBgn0085478, intron 2 of 10)	3783	836.408	4.10745
	chrX	9352799	9352953	155	Intron (FBtr0112753/FBgn0085478, intron 2 of 10)	3274	185.563	3.68049
	chrX	9399944	9400075	132	Intron (FBtr0343369/FBgn0261260, intron 2 of 14)	43310	197.915	3.6595
	chrX	9416141	9416362	222	Intron (FBtr0343369/FBgn0261260, intron 2 of 14)	29850	615.872	4.10745
	chrX	9486878	9487119	242	Intron (FBtr0343369/FBgn0261260, intron 1 of 14)	8780	851.443	4.10745
	chrX	9494240	9494382	143	Promoter (1-2kb)	1517	274.71	4.10745
	chrX	9500285	9500556	272	Promoter (<=1kb)	-156	385.366	4.10745
	chrX	9531968	9532129	162	Promoter (1-2kb)	-1689	217.413	4.10745
	chrX	9544285	9544380	96	Intron (FBtr0071374/FBgn0267253, intron 1 of 3)	6458	165.199	3.15669
	chrX	9553706	9554006	301	Promoter (<=1kb)	0	953.216	4.10745
	chrX	9554446	9554731	286	Promoter (<=1kb)	0	950.384	4.10745
	chrX	9579127	9579456	330	Promoter (<=1kb)	531	3825.95	4.10745
	chrX	9579974	9580236	263	Promoter (<=1kb)	0	363.757	4.10745
	chrX	9583800	9584074	275	Promoter (<=1kb)	-103	701.505	4.10745
	chrX	9584848	9584959	112	Promoter (<=1kb)	671	146.719	2.46837
	chrX	9585297	9585635	339	Promoter (<=1kb)	-40	684.689	4.10745
	chrX	9590043	9590180	138	Promoter (<=1kb)	439	255.445	4.10745
	chrX	9595578	9595907	330	Promoter (<=1kb)	496	162.667	3.02708
	chrX	9600169	9600378	210	Promoter (<=1kb)	-652	323.296	4.10745
	chrX	9600832	9601078	247	Promoter (<=1kb)	0	587.111	4.10745
	chrX	9640687	9640962	276	Promoter (<=1kb)	-63	1614.5	4.10745
	chrX	9641462	9641560	99	Promoter (<=1kb)	-838	158.209	2.93527
	chrX	9644819	9645148	330	Promoter (<=1kb)	777	184.749	3.68218
	chrX	9645994	9646252	259	Promoter (<=1kb)	-69	1129.75	4.10745
	chrX	9650801	9651108	308	Promoter (<=1kb)	-25	2311.65	4.10745
	chrX	9651222	9651438	217	Promoter (<=1kb)	-446	162.146	3.02827
	chrX	9652117	9652297	181	Promoter (1-2kb)	-1341	333.13	4.10745
	chrX	9658873	9659099	227	Promoter (<=1kb)	46	656.501	4.10745
	chrX	9685886	9686215	330	Promoter (<=1kb)	-219	201.112	3.65382
	chrX	9687577	9688022	446	Promoter (<=1kb)	-167	837.117	4.10745
	chrX	9738610	9738748	139	Intron (FBtr0071381/FBgn0020378, intron 2 of 2)	8962	184.144	3.6835
	chrX	9742233	9742368	136	Intron (FBtr0071381/FBgn0020378, intron 2 of 2)	12585	179.553	3.69205
	chrX	9778554	9778809	256	Promoter (<=1kb)	0	905.357	4.10745
	chrX	9892943	9893132	190	Intron (FBtr0343032/FBgn0030161, intron 1 of 4)	6234	358.43	4.10745
	chrX	9911887	9912014	128	Promoter (<=1kb)	-761	143.126	2.42055
	chrX	9993538	9993625	88	Intron (FBtr0340479/FBgn0052694, intron 2 of 4)	3843	157.988	2.93569
	chrX	10067617	10067837	221	Intron (FBtr0071423/FBgn0030174, intron 1 of 4)	3031	555.636	4.10745
	chrX	10086317	10086531	215	Promoter (<=1kb)	0	412.916	4.10745
	chrX	10114201	10114374	174	Exon (FBtr0343796/FBgn0266199, exon 4 of 4)	-9973	353.641	4.10745
	chrX	10115555	10115884	330	Intron (FBtr0110782/FBgn0083940, intron 3 of 6)	-8463	246.628	4.10745
	chrX	10202761	10202862	102	Promoter (1-2kb)	-1538	182.025	3.68762
	chrX	10233230	10233380	151	Promoter (<=1kb)	-150	189.577	3.67274
	chrX	10263626	10263736	111	Promoter (<=1kb)	-141	172.541	3.4849
	chrX	10265755	10266064	310	Promoter (<=1kb)	-492	1890.47	4.10745
	chrX	10325917	10326108	192	Promoter (<=1kb)	0	307.009	4.10745
	chrX	10363051	10363380	330	Promoter (2-3kb)	2893	144.381	2.45872
	chrX	10364750	10364836	87	Promoter (1-2kb)	1437	192.645	3.66767
	chrX	10366229	10366503	275	Promoter (<=1kb)	0	680.041	4.10745
	chrX	10367620	10368159	540	Promoter (<=1kb)	0	6703.6	4.10745
	chrX	10385786	10385998	213	Promoter (<=1kb)	0	507.412	4.10745
	chrX	10387777	10387948	172	Promoter (1-2kb)	1817	416.547	4.10745
	chrX	10460553	10460793	241	Promoter (<=1kb)	0	872.906	4.10745
	chrX	10461980	10462309	330	Promoter (1-2kb)	1244	192.306	3.66804
	chrX	10474661	10474832	172	Promoter (<=1kb)	0	335.608	4.10745
	chrX	10478691	10478867	177	Promoter (<=1kb)	0	541.083	4.10745
	chrX	10486730	10486923	194	Promoter (<=1kb)	-98	407.339	4.10745
	chrX	10513780	10513883	104	Intron (FBtr0310292/FBgn0085443, intron 4 of 9)	-20039	172.186	3.33934
	chrX	10515413	10515642	230	Intron (FBtr0310292/FBgn0085443, intron 4 of 9)	-21672	562.456	4.10745
	chrX	10543449	10543624	176	Intron (FBtr0310292/FBgn0085443, intron 2 of 9)	3130	253.653	4.10745
	chrX	10547011	10547309	299	Promoter (<=1kb)	-257	1404.03	4.10745
	chrX	10564268	10564395	128	Promoter (2-3kb)	2196	216.417	4.10745
	chrX	10570198	10570460	263	Intron (FBtr0310295/FBgn0085443, intron 4 of 10)	-3607	797.853	4.10745
	chrX	10573571	10573900	330	Intron (FBtr0310295/FBgn0085443, intron 4 of 10)	-6980	166.443	3.24196
	chrX	10582148	10582349	202	Intron (FBtr0310295/FBgn0085443, intron 2 of 10)	3073	392.209	4.10745
	chrX	10584630	10584715	86	Promoter (<=1kb)	707	192.743	3.66755
	chrX	10585570	10585696	127	Promoter (<=1kb)	-148	238.413	4.10745
	chrX	10587628	10587773	146	Promoter (1-2kb)	-1316	230.87	4.10745
	chrX	10595881	10596210	330	Promoter (<=1kb)	0	230.854	4.10745
	chrX	10600625	10600826	202	Promoter (<=1kb)	820	455.341	4.10745
	chrX	10620774	10620891	118	Promoter (<=1kb)	-584	159.691	2.93143
	chrX	10718002	10718190	189	Intron (FBtr0333017/FBgn0052676, intron 2 of 3)	-26312	298.634	4.10745
	chrX	10731785	10732114	330	Intron (FBtr0333017/FBgn0052676, intron 1 of 3)	-12388	193.078	3.66711
	chrX	10737481	10737750	270	Intron (FBtr0333017/FBgn0052676, intron 1 of 3)	-6752	1438.48	4.10745
	chrX	10738878	10739207	330	Intron (FBtr0333017/FBgn0052676, intron 1 of 3)	-5295	161.691	3.02936
	chrX	10744940	10745151	212	Promoter (<=1kb)	0	457.814	4.10745
	chrX	10745072	10745236	165	Promoter (<=1kb)	-129	148.359	2.47988
	chrX	10764226	10764488	263	Promoter (<=1kb)	0	706.714	4.10745
	chrX	10767316	10767455	140	Promoter (<=1kb)	-10	267.153	4.10745
	chrX	10768180	10768592	413	Promoter (<=1kb)	0	1426.02	4.10745
	chrX	10772109	10772283	175	Promoter (<=1kb)	-258	257.885	4.10745
	chrX	10775727	10775930	204	Promoter (2-3kb)	2959	440.692	4.10745
	chrX	10786140	10786469	330	Promoter (<=1kb)	438	144.545	2.45818
	chrX	10786972	10787062	91	Promoter (<=1kb)	-14	253.179	4.10745
	chrX	10805993	10806322	330	Promoter (<=1kb)	534	153.772	2.76211
	chrX	10823058	10823329	272	Promoter (<=1kb)	-272	559.61	4.10745
	chrX	10825440	10825645	206	Promoter (1-2kb)	-1163	453.447	4.10745
	chrX	10832472	10832686	215	Distal Intergenic	4793	573.395	4.10745
	chrX	10847022	10847351	330	Promoter (<=1kb)	0	166.851	3.24085
	chrX	10854855	10855048	194	Promoter (<=1kb)	0	499.141	4.10745
	chrX	10857361	10857671	311	Promoter (<=1kb)	0	800.515	4.10745
	chrX	10877765	10877862	98	Promoter (<=1kb)	0	306.768	4.10745
	chrX	10882830	10882964	135	Intron (FBtr0073404/FBgn0017561, intron 2 of 6)	-4937	257.302	4.10745
	chrX	10905140	10905469	330	Promoter (<=1kb)	-298	207.896	3.64085
	chrX	10933928	10934047	120	Promoter (2-3kb)	2991	181.709	3.68827
	chrX	10936653	10936931	279	Intron (FBtr0346278/FBgn0263705, intron 1 of 6)	5716	854.649	4.10745
	chrX	11136909	11137238	330	Promoter (<=1kb)	0	222.368	4.10745
	chrX	11137645	11137881	237	Promoter (<=1kb)	0	580.837	4.10745
	chrX	11146819	11147148	330	Promoter (<=1kb)	-223	183.219	3.68541
	chrX	11148471	11148774	304	Promoter (<=1kb)	0	909.082	4.10745
	chrX	11149163	11149625	463	Promoter (<=1kb)	0	1252.2	4.10745
	chrX	11154013	11154156	144	Promoter (<=1kb)	-23	197.058	3.66134
	chrX	11169172	11169273	102	Promoter (<=1kb)	-114	187.776	3.67611
	chrX	11325322	11325417	96	Promoter (<=1kb)	0	380.642	4.10745
	chrX	11339533	11339899	367	Promoter (<=1kb)	0	919.814	4.10745
	chrX	11340925	11341254	330	Promoter (<=1kb)	-841	184.884	3.68181
	chrX	11347958	11348078	121	Promoter (<=1kb)	0	200.648	3.65498
	chrX	11348897	11349226	330	Promoter (<=1kb)	0	185.195	3.68139
	chrX	11349901	11350029	129	Promoter (<=1kb)	0	235.967	4.10745
	chrX	11350622	11350951	330	Promoter (<=1kb)	14	140.968	2.35374
	chrX	11351385	11351697	313	Promoter (<=1kb)	777	1840.33	4.10745
	chrX	11370901	11371013	113	Promoter (1-2kb)	1236	162.932	3.02642
	chrX	11379265	11379462	198	Intron (FBtr0073483/FBgn0001624, intron 3 of 5)	3502	387.732	4.10745
	chrX	11390675	11390933	259	Promoter (<=1kb)	303	1060.85	4.10745
	chrX	11419325	11419477	153	Promoter (1-2kb)	-1903	187.174	3.67733
	chrX	11423257	11423521	265	Promoter (<=1kb)	425	908.536	4.10745
	chrX	11447118	11447294	177	Intron (FBtr0073547/FBgn0262740, intron 1 of 8)	3941	513.516	4.10745
	chrX	11449545	11449804	260	Intron (FBtr0073547/FBgn0262740, intron 1 of 8)	4534	1204.06	4.10745
	chrX	11451132	11451303	172	Intron (FBtr0073547/FBgn0262740, intron 1 of 8)	3035	411.201	4.10745
	chrX	11452948	11453222	275	Promoter (1-2kb)	1116	846.076	4.10745
	chrX	11454378	11454551	174	Promoter (<=1kb)	0	374.621	4.10745
	chrX	11459405	11459734	330	Promoter (<=1kb)	-52	160.237	2.97866
	chrX	11466912	11467050	139	Intron (FBtr0305607/FBgn0262685, intron 1 of 7)	7126	225.655	4.10745
	chrX	11483350	11483549	200	Promoter (<=1kb)	0	486.712	4.10745
	chrX	11492924	11493253	330	Promoter (<=1kb)	0	222.974	4.10745
	chrX	11494786	11495079	294	Promoter (<=1kb)	967	786.11	4.10745
	chrX	11499555	11499736	182	Intron (FBtr0301020/FBgn0052666, intron 2 of 5)	5736	417.363	4.10745
	chrX	11500160	11500489	330	Intron (FBtr0301020/FBgn0052666, intron 2 of 5)	6341	189.38	3.67342
	chrX	11518542	11518729	188	Intron (FBtr0301020/FBgn0052666, intron 2 of 5)	24723	295.23	4.10745
	chrX	11521653	11521853	201	Intron (FBtr0301020/FBgn0052666, intron 2 of 5)	-25569	318.755	4.10745
	chrX	11527320	11527649	330	Intron (FBtr0301020/FBgn0052666, intron 2 of 5)	-19773	153	2.70801
	chrX	11528395	11528617	223	Intron (FBtr0301020/FBgn0052666, intron 2 of 5)	-18805	547.541	4.10745
	chrX	11548784	11548990	207	Promoter (1-2kb)	1362	447.347	4.10745
	chrX	11550183	11550327	145	Promoter (2-3kb)	2761	196.272	3.66241
	chrX	11573547	11573876	330	Promoter (<=1kb)	0	173.714	3.48159
	chrX	11576669	11576854	186	Promoter (<=1kb)	-29	310.429	4.10745
	chrX	11578939	11579133	195	Promoter (<=1kb)	0	425.457	4.10745
	chrX	11580599	11580875	277	Promoter (<=1kb)	0	705.721	4.10745
	chrX	11616064	11616230	167	Promoter (<=1kb)	0	247.187	4.10745
	chrX	11621829	11622158	330	Promoter (<=1kb)	0	221.457	4.10745
	chrX	11622992	11623201	210	Promoter (<=1kb)	977	485.638	4.10745
	chrX	11629049	11629274	226	Intron (FBtr0073522/FBgn0004370, intron 2 of 12)	7034	552.662	4.10745
	chrX	11633304	11633492	189	Intron (FBtr0073522/FBgn0004370, intron 2 of 12)	11289	256.884	4.10745
	chrX	11653109	11653307	199	Intron (FBtr0073522/FBgn0004370, intron 2 of 12)	25244	411.103	4.10745
	chrX	11657283	11657407	125	Intron (FBtr0073522/FBgn0004370, intron 2 of 12)	21144	198.161	3.65887
	chrX	11658596	11658753	158	Intron (FBtr0073522/FBgn0004370, intron 2 of 12)	19798	176.83	3.69784
	chrX	11659274	11659399	126	Intron (FBtr0073522/FBgn0004370, intron 2 of 12)	19152	173.877	3.4813
	chrX	11660569	11660754	186	Intron (FBtr0073522/FBgn0004370, intron 2 of 12)	17797	415.715	4.10745
	chrX	11681587	11681801	215	Promoter (2-3kb)	2617	325.021	4.10745
	chrX	11684599	11684928	330	Intron (FBtr0073526/FBgn0014133, intron 3 of 5)	5629	190.318	3.67108
	chrX	11694891	11695163	273	Promoter (<=1kb)	0	1068.29	4.10745
	chrX	11714713	11714961	249	Promoter (<=1kb)	0	436.665	4.10745
	chrX	11716118	11716414	297	Promoter (<=1kb)	306	804.042	4.10745
	chrX	11716602	11716931	330	Promoter (<=1kb)	0	149.024	2.49398
	chrX	11720167	11720498	332	Promoter (<=1kb)	0	614.251	4.10745
	chrX	11736592	11736689	98	Promoter (2-3kb)	-2697	262.222	4.10745
	chrX	11783606	11783712	107	Distal Intergenic	-3669	200.744	3.65479
	chrX	11788593	11788799	207	Promoter (<=1kb)	-45	477.777	4.10745
	chrX	11792399	11792640	242	Promoter (<=1kb)	0	657.706	4.10745
	chrX	11806269	11806598	330	Promoter (<=1kb)	0	266.407	4.10745
	chrX	11807536	11807699	164	Promoter (<=1kb)	-419	395.666	4.10745
	chrX	11818432	11818746	315	Promoter (<=1kb)	95	2197.68	4.10745
	chrX	11846458	11846620	163	Promoter (<=1kb)	-359	247.718	4.10745
	chrX	11852456	11852672	217	Promoter (<=1kb)	0	621.223	4.10745
	chrX	11854848	11854933	86	Promoter (<=1kb)	0	283.995	4.10745
	chrX	11857615	11857815	201	Promoter (2-3kb)	2593	442.92	4.10745
	chrX	11887106	11887308	203	Promoter (<=1kb)	0	631.075	4.10745
	chrX	11888167	11888496	330	Promoter (<=1kb)	0	210.361	3.63619
	chrX	11915219	11915360	142	Promoter (1-2kb)	1900	167.333	3.24002
	chrX	11920975	11921249	275	Promoter (<=1kb)	-401	332.06	4.10745
	chrX	12000332	12000486	155	Promoter (1-2kb)	1821	244.16	4.10745
	chrX	12004094	12004315	222	Promoter (<=1kb)	-180	521.953	4.10745
	chrX	12012183	12012434	252	Promoter (<=1kb)	0	383.776	4.10745
	chrX	12014909	12015238	330	Promoter (<=1kb)	-245	161.377	3.03049
	chrX	12073739	12073916	178	Promoter (<=1kb)	-921	353.238	4.10745
	chrX	12074405	12074491	87	Promoter (1-2kb)	-1587	149.125	2.50976
	chrX	12075676	12075834	159	Promoter (2-3kb)	-2858	256.602	4.10745
	chrX	12082412	12082533	122	Intron (FBtr0333769/FBgn0264675, intron 2 of 2)	4492	160.577	2.97813
	chrX	12084524	12084649	126	Promoter (2-3kb)	2376	204.926	3.64722
	chrX	12202263	12202544	282	Promoter (1-2kb)	-1254	855.489	4.10745
	chrX	12203650	12203909	260	Promoter (<=1kb)	0	579.208	4.10745
	chrX	12217743	12217950	208	Intron (FBtr0346335/FBgn0267001, intron 6 of 19)	-11973	690.531	4.10745
	chrX	12221482	12221811	330	Intron (FBtr0346335/FBgn0267001, intron 6 of 19)	-8112	236.281	4.10745
	chrX	12225447	12225776	330	Intron (FBtr0346335/FBgn0267001, intron 6 of 19)	-4147	140.462	2.3551
	chrX	12226648	12226977	330	Promoter (2-3kb)	-2946	150.908	2.61733
	chrX	12241120	12241334	215	Intron (FBtr0346335/FBgn0267001, intron 6 of 19)	-5243	553.454	4.10745
	chrX	12242503	12242631	129	Intron (FBtr0346335/FBgn0267001, intron 6 of 19)	-6626	209.357	3.63752
	chrX	12248970	12249187	218	Intron (FBtr0346335/FBgn0267001, intron 6 of 19)	-13093	487.902	4.10745
	chrX	12276600	12276929	330	Promoter (1-2kb)	1965	162.007	3.02871
	chrX	12453777	12453912	136	Promoter (<=1kb)	-817	210.688	3.63552
	chrX	12454469	12454661	193	Promoter (<=1kb)	-68	280.835	4.10745
	chrX	12462917	12463246	330	Promoter (<=1kb)	0	227.709	4.10745
	chrX	12467225	12467554	330	Intron (FBtr0299558/FBgn0259143, intron 2 of 5)	3697	147.914	2.48124
	chrX	12470411	12470740	330	Promoter (<=1kb)	-924	175.211	3.47894
	chrX	12472243	12472525	283	Promoter (<=1kb)	579	792.714	4.10745
	chrX	12507643	12507972	330	Intron (FBtr0073652/FBgn0030396, intron 1 of 3)	9942	203.17	3.65002
	chrX	12510786	12511023	238	Intron (FBtr0073652/FBgn0030396, intron 1 of 3)	13085	658.35	4.10745
	chrX	12539329	12539501	173	Intron (FBtr0333156/FBgn0264542, intron 1 of 7)	7481	298.042	4.10745
	chrX	12547250	12547338	89	Promoter (<=1kb)	-268	173.225	3.4829
	chrX	12575380	12575709	330	Intron (FBtr0331718/FBgn0030400, intron 1 of 2)	-6928	187.846	3.67605
	chrX	12575998	12576276	279	Intron (FBtr0331718/FBgn0030400, intron 1 of 2)	6917	592.145	4.10745
	chrX	12578805	12578934	130	Intron (FBtr0331718/FBgn0030400, intron 1 of 2)	4259	198.458	3.65811
	chrX	12579531	12579822	292	Intron (FBtr0331718/FBgn0030400, intron 1 of 2)	3371	812.429	4.10745
	chrX	12583160	12583408	249	Promoter (<=1kb)	0	602.739	4.10745
	chrX	12591388	12591717	330	Promoter (<=1kb)	476	286.473	4.10745
	chrX	12629499	12629828	330	Promoter (<=1kb)	0	140.727	2.35433
	chrX	12631424	12631603	180	Promoter (<=1kb)	-2	289.346	4.10745
	chrX	12653611	12653869	259	Promoter (<=1kb)	0	873.421	4.10745
	chrX	12654469	12654798	330	Promoter (<=1kb)	0	238.079	4.10745
	chrX	12658912	12659130	219	Promoter (<=1kb)	-285	342.331	4.10745
	chrX	12660058	12660387	330	Promoter (<=1kb)	-147	148.745	2.49438
	chrX	12661342	12661671	330	Promoter (<=1kb)	808	195.847	3.66323
	chrX	12665515	12665785	271	Promoter (<=1kb)	298	891.767	4.10745
	chrX	12666487	12666652	166	Promoter (1-2kb)	1270	283.404	4.10745
	chrX	12668012	12668341	330	Promoter (2-3kb)	2795	159.208	2.93255
	chrX	12670200	12670399	200	Intron (FBtr0073683/FBgn0011837, intron 2 of 3)	4983	515.6	4.10745
	chrX	12719255	12719474	220	Promoter (<=1kb)	-795	614.952	4.10745
	chrX	12724680	12725009	330	Intron (FBtr0333767/FBgn0265523, intron 2 of 9)	5944	153.836	2.76185
	chrX	12734996	12735077	82	Intron (FBtr0333767/FBgn0265523, intron 1 of 9)	-4043	184.103	3.68356
	chrX	12735458	12735909	452	Intron (FBtr0333767/FBgn0265523, intron 1 of 9)	-4505	662.045	4.10745
	chrX	12736967	12737296	330	Intron (FBtr0333767/FBgn0265523, intron 1 of 9)	4774	185.294	3.68103
	chrX	12742256	12742585	330	Promoter (<=1kb)	0	153.723	2.76221
	chrX	12748144	12748473	330	Promoter (1-2kb)	1827	140.393	2.34444
	chrX	12750876	12751236	361	Promoter (<=1kb)	-631	678.01	4.10745
	chrX	12751160	12751586	427	Promoter (<=1kb)	-281	1419.66	4.10745
	chrX	12752220	12752518	299	Promoter (<=1kb)	353	2355.7	4.10745
	chrX	12753447	12753776	330	Promoter (1-2kb)	1580	178.29	3.69499
	chrX	12754401	12754670	270	Promoter (2-3kb)	2534	960.209	4.10745
	chrX	12755269	12755480	212	Distal Intergenic	3402	384.168	4.10745
	chrX	12755798	12756127	330	Distal Intergenic	3931	166.927	3.24069
	chrX	12756432	12756761	330	Distal Intergenic	3856	140.525	2.35481
	chrX	12766430	12766578	149	Promoter (<=1kb)	0	287.126	4.10745
	chrX	12887687	12887782	96	Intron (FBtr0333525/FBgn0259171, intron 1 of 9)	9545	140.873	2.35404
	chrX	12889273	12889428	156	Intron (FBtr0333525/FBgn0259171, intron 1 of 9)	7899	348.325	4.10745
	chrX	12896334	12896663	330	Promoter (<=1kb)	664	185.472	3.68061
	chrX	12897191	12897520	330	Promoter (<=1kb)	0	201.005	3.65408
	chrX	12906882	12907211	330	Promoter (<=1kb)	0	142.728	2.396
	chrX	12923365	12923530	166	Intron (FBtr0308694/FBgn0086675, intron 2 of 6)	5888	279.626	4.10745
	chrX	12939988	12940172	185	Promoter (1-2kb)	-1100	202.537	3.65099
	chrX	12947808	12947892	85	3' UTR	6536	199.906	3.65594
	chrX	13023918	13024027	110	Promoter (1-2kb)	1720	195.94	3.6631
	chrX	13090107	13090436	330	Promoter (<=1kb)	0	178.386	3.69475
	chrX	13090901	13091230	330	Promoter (<=1kb)	0	154.007	2.79237
	chrX	13094217	13094374	158	Promoter (<=1kb)	0	389.359	4.10745
	chrX	13100011	13100213	203	Intron (FBtr0346130/FBgn0263005, intron 2 of 5)	5543	415.376	4.10745
	chrX	13108549	13108637	89	Promoter (<=1kb)	-355	190.425	3.67089
	chrX	13112358	13112687	330	Promoter (<=1kb)	0	226.42	4.10745
	chrX	13128809	13129018	210	Promoter (<=1kb)	0	760.157	4.10745
	chrX	13130454	13130626	173	Promoter (<=1kb)	-367	336.093	4.10745
	chrX	13131187	13131535	349	Promoter (<=1kb)	0	3410.44	4.10745
	chrX	13135798	13136006	209	Distal Intergenic	-3193	532.657	4.10745
	chrX	13143217	13143368	152	Intron (FBtr0073725/FBgn0052645, intron 1 of 5)	4018	258.597	4.10745
	chrX	13159505	13159800	296	Promoter (<=1kb)	0	803.629	4.10745
	chrX	13211496	13211825	330	Promoter (<=1kb)	0	209.831	3.63692
	chrX	13214129	13214355	227	Promoter (1-2kb)	1791	481.249	4.10745
	chrX	13221415	13221543	129	Intron (FBtr0073732/FBgn0004456, intron 2 of 7)	9077	268.99	4.10745
	chrX	13232475	13232751	277	Intron (FBtr0073732/FBgn0004456, intron 1 of 7)	3815	1144.38	4.10745
	chrX	13232907	13233124	218	Intron (FBtr0073732/FBgn0004456, intron 1 of 7)	3442	183.301	3.68535
	chrX	13234184	13234451	268	Promoter (2-3kb)	2115	612.712	4.10745
	chrX	13238645	13238733	89	Promoter (2-3kb)	-2079	146.012	2.46997
	chrX	13244560	13244726	167	Intron (FBtr0073732/FBgn0004456, intron 1 of 7)	-7994	297.769	4.10745
	chrX	13251400	13251652	253	Intron (FBtr0073732/FBgn0004456, intron 1 of 7)	5531	1111.87	4.10745
	chrX	13253168	13253339	172	Intron (FBtr0073732/FBgn0004456, intron 1 of 7)	3844	360.068	4.10745
	chrX	13257078	13257407	330	Promoter (<=1kb)	0	246.458	4.10745
	chrX	13276774	13277103	330	Intron (FBtr0333331/FBgn0041210, intron 2 of 13)	-4030	208.113	3.64058
	chrX	13277508	13277837	330	Intron (FBtr0333331/FBgn0041210, intron 2 of 13)	-4764	149.363	2.52581
	chrX	13285491	13285820	330	Promoter (<=1kb)	0	183.899	3.68392
	chrX	13329666	13329796	131	Promoter (<=1kb)	-28	253.125	4.10745
	chrX	13332106	13332435	330	Promoter (<=1kb)	0	323.152	4.10745
	chrX	13332949	13333278	330	Promoter (<=1kb)	575	157.944	2.93585
	chrX	13334936	13335108	173	Promoter (2-3kb)	2530	384.92	4.10745
	chrX	13337570	13337836	267	Promoter (<=1kb)	0	771.754	4.10745
	chrX	13338175	13338379	205	Promoter (<=1kb)	0	466.669	4.10745
	chrX	13368232	13368452	221	Promoter (<=1kb)	41	536.936	4.10745
	chrX	13370850	13371179	330	Promoter (<=1kb)	0	221.244	4.10745
	chrX	13373426	13373676	251	Promoter (<=1kb)	-83	537.002	4.10745
	chrX	13376546	13376875	330	Promoter (2-3kb)	2787	146.536	2.46887
	chrX	13383749	13384078	330	Promoter (<=1kb)	799	271.63	4.10745
	chrX	13384992	13385321	330	Promoter (<=1kb)	0	173.945	3.48118
	chrX	13387408	13387563	156	Promoter (<=1kb)	0	290.677	4.10745
	chrX	13391158	13391487	330	Promoter (<=1kb)	-598	151.378	2.61631
	chrX	13396747	13397076	330	Promoter (<=1kb)	0	148.306	2.48008
	chrX	13401389	13401497	109	Promoter (1-2kb)	1366	206.348	3.64388
	chrX	13404020	13404349	330	Promoter (<=1kb)	-400	209.379	3.63746
	chrX	13413011	13413248	238	Promoter (<=1kb)	0	763.053	4.10745
	chrX	13563477	13563858	382	Promoter (<=1kb)	0	649.002	4.10745
	chrX	13601470	13601799	330	Promoter (<=1kb)	0	141.788	2.36254
	chrX	13606045	13606178	134	Promoter (<=1kb)	0	265.105	4.10745
	chrX	13612008	13612195	188	Promoter (<=1kb)	0	449.02	4.10745
	chrX	13616790	13616942	153	Promoter (<=1kb)	-47	260.657	4.10745
	chrX	13624639	13624736	98	Promoter (<=1kb)	-9	245.271	4.10745
	chrX	13625943	13626272	330	Promoter (1-2kb)	1198	236.291	4.10745
	chrX	13626644	13626797	154	Promoter (1-2kb)	1899	243.648	4.10745
	chrX	13630397	13630570	174	Intron (FBtr0073808/FBgn0030505, intron 1 of 9)	5652	277.121	4.10745
	chrX	13633339	13633668	330	Intron (FBtr0073808/FBgn0030505, intron 1 of 9)	-8507	155.519	2.82214
	chrX	13640338	13640690	353	Promoter (1-2kb)	-1485	3442.2	4.10745
	chrX	13641341	13641683	343	Promoter (<=1kb)	-492	712.279	4.10745
	chrX	13644151	13644365	215	Promoter (<=1kb)	-814	455.473	4.10745
	chrX	13645072	13645401	330	Promoter (<=1kb)	0	166.019	3.2424
	chrX	13736196	13736381	186	Promoter (<=1kb)	0	421.418	4.10745
	chrX	13739386	13739693	308	Promoter (<=1kb)	-51	2299.64	4.10745
	chrX	13740129	13740352	224	Promoter (<=1kb)	347	816.822	4.10745
	chrX	13744652	13744812	161	Promoter (<=1kb)	0	422.69	4.10745
	chrX	13749487	13749666	180	Intron (FBtr0112981/FBgn0030520, intron 4 of 4)	4547	368.485	4.10745
	chrX	13755258	13755587	330	Promoter (<=1kb)	0	222.597	4.10745
	chrX	13757048	13757177	130	Promoter (<=1kb)	-2	245.491	4.10745
	chrX	13762503	13762663	161	Promoter (<=1kb)	-89	221.523	4.10745
	chrX	13764487	13764659	173	Promoter (1-2kb)	1735	234.527	4.10745
	chrX	13782213	13782377	165	Promoter (<=1kb)	-43	437.345	4.10745
	chrX	13783533	13783687	155	Promoter (<=1kb)	-27	329.944	4.10745
	chrX	13789012	13789220	209	Promoter (1-2kb)	1891	372.777	4.10745
	chrX	13805698	13805837	140	Intron (FBtr0073826/FBgn0261244, intron 13 of 13)	-5847	167.62	3.23941
	chrX	13811535	13811672	138	Promoter (<=1kb)	-12	314.417	4.10745
	chrX	13815507	13815836	330	Intron (FBtr0073835/FBgn0030529, intron 1 of 3)	3823	202.232	3.65189
	chrX	13817497	13817826	330	Intron (FBtr0073835/FBgn0030529, intron 1 of 3)	4481	150.734	2.59711
	chrX	13838945	13839194	250	Promoter (<=1kb)	817	802.088	4.10745
	chrX	13845847	13846047	201	Promoter (<=1kb)	0	549.462	4.10745
	chrX	13890992	13891076	85	Intron (FBtr0346001/FBgn0267033, intron 4 of 10)	42267	220.229	4.10745
	chrX	13954043	13954175	133	Promoter (1-2kb)	-1061	193.274	3.66674
	chrX	13995967	13996297	331	Promoter (<=1kb)	-48	629.48	4.10745
	chrX	14208486	14208642	157	Promoter (2-3kb)	2815	253.939	4.10745
	chrX	14211530	14211859	330	Promoter (<=1kb)	-73	152.753	2.70858
	chrX	14213562	14213891	330	Promoter (1-2kb)	1147	141.113	2.35345
	chrX	14218157	14218296	140	Intron (FBtr0073900/FBgn0026713, intron 2 of 3)	5742	210.58	3.63599
	chrX	14238057	14238381	325	Promoter (<=1kb)	0	1090.25	4.10745
	chrX	14247430	14247701	272	Promoter (<=1kb)	-31	532.888	4.10745
	chrX	14332369	14332524	156	Intron (FBtr0073913/FBgn0052600, intron 2 of 9)	10143	299.749	4.10745
	chrX	14435627	14435956	330	Intron (FBtr0073913/FBgn0052600, intron 6 of 9)	44130	144.33	2.45887
	chrX	14481642	14481971	330	Promoter (1-2kb)	-1556	144.566	2.45813
	chrX	14494125	14494358	234	Promoter (1-2kb)	-1777	422.387	4.10745
	chrX	14580461	14580645	185	Promoter (<=1kb)	0	658.037	4.10745
	chrX	14602537	14602866	330	Promoter (<=1kb)	0	328.662	4.10745
	chrX	14612394	14612600	207	Intron (FBtr0073942/FBgn0015773, intron 2 of 6)	-9814	389.186	4.10745
	chrX	14621598	14621750	153	Intron (FBtr0073942/FBgn0015773, intron 1 of 6)	-19018	236.668	4.10745
	chrX	14622302	14622497	196	Intron (FBtr0073942/FBgn0015773, intron 1 of 6)	-19722	411.468	4.10745
	chrX	14627457	14627726	270	Intron (FBtr0073942/FBgn0015773, intron 1 of 6)	-24877	779.693	4.10745
	chrX	14633226	14633400	175	Intron (FBtr0073942/FBgn0015773, intron 1 of 6)	20434	239.071	4.10745
	chrX	14634793	14635012	220	Intron (FBtr0073942/FBgn0015773, intron 1 of 6)	18822	642.032	4.10745
	chrX	14669363	14669571	209	Distal Intergenic	-9997	257.143	4.10745
	chrX	14679270	14679383	114	Promoter (<=1kb)	-185	156.569	2.85568
	chrX	14689169	14689419	251	3' UTR	9601	960.856	4.10745
	chrX	14717307	14717566	260	Promoter (1-2kb)	1376	853.326	4.10745
	chrX	14727692	14727876	185	Intron (FBtr0302018/FBgn0015774, intron 3 of 8)	-8750	338.836	4.10745
	chrX	14738523	14738689	167	Intron (FBtr0302018/FBgn0015774, intron 3 of 8)	10321	296.762	4.10745
	chrX	14749156	14749485	330	Promoter (<=1kb)	0	143.386	2.41991
	chrX	14765901	14765988	88	Promoter (<=1kb)	-114	165.013	3.15702
	chrX	14805753	14805863	111	Intron (FBtr0333655/FBgn0003301, intron 1 of 15)	12926	293.301	4.10745
	chrX	14825988	14826317	330	Promoter (<=1kb)	0	237.72	4.10745
	chrX	14832431	14832857	427	Promoter (<=1kb)	0	5400.77	4.10745
	chrX	14839110	14839367	258	Promoter (<=1kb)	-4	501.15	4.10745
	chrX	14839733	14840062	330	Promoter (<=1kb)	0	295.118	4.10745
	chrX	14882796	14883048	253	Promoter (<=1kb)	-210	1244.54	4.10745
	chrX	14950834	14951165	332	Promoter (<=1kb)	-85	555.158	4.10745
	chrX	14952420	14952674	255	Promoter (<=1kb)	-411	818.86	4.10745
	chrX	14955244	14955399	156	Promoter (<=1kb)	-78	421.709	4.10745
	chrX	15021188	15021351	164	Intron (FBtr0346087/FBgn0030600, intron 13 of 22)	-3085	274.198	4.10745
	chrX	15022302	15022546	245	Promoter (1-2kb)	-1890	760.127	4.10745
	chrX	15043075	15043351	277	Promoter (<=1kb)	-772	849.087	4.10745
	chrX	15063756	15063974	219	Promoter (<=1kb)	0	474.64	4.10745
	chrX	15066403	15066732	330	Promoter (<=1kb)	0	167.168	3.24019
	chrX	15074863	15075247	385	Promoter (<=1kb)	973	739.012	4.10745
	chrX	15076028	15076357	330	Promoter (<=1kb)	0	186.848	3.67806
	chrX	15078558	15078887	330	Promoter (1-2kb)	-1069	173.263	3.48285
	chrX	15081162	15081286	125	Promoter (<=1kb)	0	244.373	4.10745
	chrX	15084680	15084854	175	Promoter (<=1kb)	0	198.595	3.65766
	chrX	15085909	15086069	161	Promoter (<=1kb)	-56	196.24	3.66254
	chrX	15120230	15120346	117	Distal Intergenic	-3688	220.027	4.10745
	chrX	15139303	15139602	300	Promoter (<=1kb)	0	517.964	4.10745
	chrX	15216188	15216343	156	Distal Intergenic	4833	178.201	3.69516
	chrX	15235432	15235517	86	Distal Intergenic	-5557	204.291	3.64807
	chrX	15292840	15293169	330	Promoter (<=1kb)	0	158.233	2.93516
	chrX	15298322	15298602	281	Promoter (<=1kb)	-105	425.048	4.10745
	chrX	15319323	15319498	176	Promoter (<=1kb)	0	510.664	4.10745
	chrX	15320173	15320385	213	Promoter (<=1kb)	0	448.518	4.10745
	chrX	15323312	15323563	252	Promoter (<=1kb)	-28	779.924	4.10745
	chrX	15328232	15328394	163	Promoter (<=1kb)	0	286.164	4.10745
	chrX	15364583	15364912	330	Intron (FBtr0305191/FBgn0000028, intron 2 of 7)	-3522	152.781	2.70852
	chrX	15406989	15407070	82	3' UTR	-21548	239.26	4.10745
	chrX	15482252	15482404	153	Promoter (<=1kb)	0	255.683	4.10745
	chrX	15486694	15487023	330	Promoter (<=1kb)	0	158.246	2.935
	chrX	15497555	15497712	158	Promoter (<=1kb)	150	187.062	3.67752
	chrX	15498850	15499179	330	Promoter (<=1kb)	0	284.757	4.10745
	chrX	15532154	15532344	191	Intron (FBtr0332497/FBgn0022710, intron 2 of 5)	-9991	343.069	4.10745
	chrX	15549146	15549237	92	Promoter (1-2kb)	-1406	187.535	3.67679
	chrX	15554273	15554596	324	Promoter (<=1kb)	0	758.038	4.10745
	chrX	15574395	15574724	330	Promoter (<=1kb)	0	253.032	4.10745
	chrX	15578100	15578239	140	Promoter (<=1kb)	0	356.553	4.10745
	chrX	15579673	15579936	264	Promoter (1-2kb)	1468	1275.69	4.10745
	chrX	15591746	15591828	83	Promoter (1-2kb)	1323	227.267	4.10745
	chrX	15594595	15594705	111	Promoter (1-2kb)	-1061	189.528	3.67311
	chrX	15599775	15599994	220	Distal Intergenic	-6241	581.128	4.10745
	chrX	15602462	15602791	330	Distal Intergenic	-8928	163.963	3.15888
	chrX	15615519	15615721	203	Intron (FBtr0340346/FBgn0003463, intron 1 of 5)	10819	408.822	4.10745
	chrX	15618017	15618230	214	Intron (FBtr0340346/FBgn0003463, intron 1 of 5)	8310	382.195	4.10745
	chrX	15619368	15619594	227	Intron (FBtr0340346/FBgn0003463, intron 1 of 5)	6946	625.652	4.10745
	chrX	15619645	15619752	108	Intron (FBtr0340346/FBgn0003463, intron 1 of 5)	6788	306.766	4.10745
	chrX	15622937	15623161	225	Intron (FBtr0340346/FBgn0003463, intron 1 of 5)	3379	761.689	4.10745
	chrX	15632754	15632932	179	Promoter (<=1kb)	502	313.687	4.10745
	chrX	15647572	15647717	146	Distal Intergenic	3350	223.58	4.10745
	chrX	15653661	15653787	127	Distal Intergenic	-8798	303.216	4.10745
	chrX	15671093	15671299	207	Promoter (<=1kb)	-64	400.435	4.10745
	chrX	15697273	15697602	330	Promoter (<=1kb)	0	264.756	4.10745
	chrX	15697835	15698138	304	Promoter (<=1kb)	330	858.917	4.10745
	chrX	15701158	15701321	164	Promoter (<=1kb)	0	374.126	4.10745
	chrX	15703842	15704072	231	Promoter (<=1kb)	-53	296.812	4.10745
	chrX	15709679	15710008	330	Promoter (<=1kb)	531	190.926	3.66978
	chrX	15710508	15710696	189	Promoter (<=1kb)	0	319.01	4.10745
	chrX	15734040	15734260	221	Promoter (<=1kb)	-10	349.55	4.10745
	chrX	15739023	15739193	171	Promoter (<=1kb)	-37	392.793	4.10745
	chrX	15740291	15740473	183	Promoter (1-2kb)	1061	346.194	4.10745
	chrX	15746107	15746436	330	Promoter (<=1kb)	0	187.45	3.67685
	chrX	15748988	15749241	254	Promoter (<=1kb)	0	748.826	4.10745
	chrX	15760591	15760920	330	Promoter (<=1kb)	0	153.796	2.76206
	chrX	15761085	15761273	189	Promoter (<=1kb)	0	228.483	4.10745
	chrX	15785450	15786339	890	Promoter (<=1kb)	0	447.141	4.10745
	chrX	15785450	15786339	890	Promoter (<=1kb)	0	6597.48	4.10745
	chrX	15788336	15788568	233	Promoter (<=1kb)	-329	198.479	3.65798
	chrX	15788670	15788937	268	Promoter (<=1kb)	0	517.833	4.10745
	chrX	15803034	15803133	100	Promoter (<=1kb)	-65	217.293	4.10745
	chrX	15803781	15804110	330	Promoter (<=1kb)	0	182.021	3.68768
	chrX	15835403	15835632	230	Promoter (<=1kb)	0	550.144	4.10745
	chrX	15844213	15844391	179	Promoter (<=1kb)	-68	327.952	4.10745
	chrX	15849104	15849453	350	Promoter (<=1kb)	0	3807.51	4.10745
	chrX	15853117	15853460	344	Promoter (<=1kb)	0	640.775	4.10745
	chrX	15857766	15857973	208	Promoter (<=1kb)	0	439.544	4.10745
	chrX	15859934	15860263	330	Promoter (<=1kb)	0	212.751	3.63107
	chrX	15860548	15860877	330	Promoter (<=1kb)	0	251.189	4.10745
	chrX	15866946	15867073	128	Promoter (1-2kb)	-1072	159.149	2.93282
	chrX	15867820	15868146	327	Promoter (<=1kb)	0	2074.88	4.10745
	chrX	15870052	15870159	108	Promoter (<=1kb)	-24	361.953	4.10745
	chrX	15890075	15890204	130	Promoter (<=1kb)	0	165.194	3.15674
	chrX	15890478	15890602	125	Promoter (<=1kb)	0	157.701	2.93628
	chrX	15891997	15892228	232	Promoter (<=1kb)	0	623.023	4.10745
	chrX	15910005	15910306	302	Promoter (<=1kb)	-329	813.083	4.10745
	chrX	15933601	15933874	274	Promoter (<=1kb)	0	732.981	4.10745
	chrX	15934074	15934504	431	Promoter (<=1kb)	-207	1877.35	4.10745
	chrX	15940424	15940675	252	Promoter (<=1kb)	0	477.284	4.10745
	chrX	15944856	15945031	176	Promoter (<=1kb)	0	308.235	4.10745
	chrX	15986745	15987033	289	Promoter (<=1kb)	0	799.668	4.10745
	chrX	15991786	15992115	330	Promoter (<=1kb)	0	197.271	3.66096
	chrX	15992318	15992399	82	Promoter (<=1kb)	-69	182.814	3.68637
	chrX	15996839	15997285	447	Promoter (<=1kb)	0	6663.22	4.10745
	chrX	16005554	16006218	665	Promoter (<=1kb)	0	11818.7	4.10745
	chrX	16073421	16073674	254	Promoter (<=1kb)	0	502.074	4.10745
	chrX	16086182	16086511	330	Promoter (<=1kb)	878	188.932	3.67428
	chrX	16090263	16090520	258	Promoter (<=1kb)	-896	1379.16	4.10745
	chrX	16096604	16096807	204	Promoter (<=1kb)	0	507.468	4.10745
	chrX	16105030	16105393	364	Promoter (<=1kb)	-84	1445.81	4.10745
	chrX	16105808	16105977	170	Promoter (<=1kb)	-862	254.238	4.10745
	chrX	16139110	16139439	330	Intron (FBtr0310302/FBgn0285879, intron 1 of 3)	9538	140.409	2.34434
	chrX	16158665	16158761	97	Distal Intergenic	-9688	253.8	4.10745
	chrX	16244775	16245104	330	Distal Intergenic	9013	177.58	3.69644
	chrX	16263480	16263734	255	Promoter (2-3kb)	2803	926.703	4.10745
	chrX	16270745	16271002	258	Promoter (<=1kb)	0	977.496	4.10745
	chrX	16276143	16276472	330	Promoter (<=1kb)	0	151.576	2.6161
	chrX	16278207	16278408	202	Promoter (<=1kb)	0	400.968	4.10745
	chrX	16278831	16279104	274	Promoter (<=1kb)	252	905.046	4.10745
	chrX	16279398	16279660	263	Promoter (<=1kb)	819	790.053	4.10745
	chrX	16286180	16286374	195	Promoter (<=1kb)	0	517.067	4.10745
	chrX	16288671	16288782	112	Promoter (<=1kb)	-28	195.597	3.6638
	chrX	16296496	16296690	195	Promoter (<=1kb)	0	582.503	4.10745
	chrX	16313073	16313245	173	Promoter (<=1kb)	0	459.25	4.10745
	chrX	16320234	16320500	267	Promoter (<=1kb)	0	930.194	4.10745
	chrX	16321165	16321257	93	Promoter (<=1kb)	-795	223.873	4.10745
	chrX	16323079	16323408	330	Promoter (<=1kb)	0	202.287	3.65176
	chrX	16325548	16325877	330	Promoter (<=1kb)	0	229.459	4.10745
	chrX	16331987	16332180	194	Promoter (<=1kb)	0	371.162	4.10745
	chrX	16332857	16333195	339	Promoter (<=1kb)	405	902.801	4.10745
	chrX	16333579	16333908	330	Promoter (<=1kb)	0	151.142	2.61677
	chrX	16335363	16335465	103	Promoter (<=1kb)	-719	240.346	4.10745
	chrX	16358759	16359136	378	Promoter (<=1kb)	0	688.511	4.10745
	chrX	16359132	16359464	333	Promoter (<=1kb)	0	287.978	4.10745
	chrX	16361314	16361754	441	Promoter (<=1kb)	0	4235.09	4.10745
	chrX	16384877	16385233	357	Promoter (<=1kb)	0	266.182	4.10745
	chrX	16414572	16414735	164	Promoter (<=1kb)	-311	292.99	4.10745
	chrX	16420072	16420401	330	Promoter (<=1kb)	0	163.039	3.02604
	chrX	16422104	16422433	330	Promoter (<=1kb)	0	241.325	4.10745
	chrX	16422624	16422852	229	Promoter (<=1kb)	0	584.999	4.10745
	chrX	16446929	16447108	180	Promoter (<=1kb)	0	555.897	4.10745
	chrX	16448429	16448758	330	Promoter (<=1kb)	0	164.405	3.15812
	chrX	16456679	16457008	330	3' UTR	7527	265.928	4.10745
	chrX	16547464	16547725	262	Promoter (<=1kb)	0	828.688	4.10745
	chrX	16552596	16552875	280	Promoter (1-2kb)	1076	519.57	4.10745
	chrX	16560003	16560153	151	Promoter (<=1kb)	0	284.222	4.10745
	chrX	16573789	16573921	133	Intron (FBtr0305198/FBgn0267912, intron 1 of 1)	-4349	161.377	3.03055
	chrX	16587045	16587374	330	Promoter (<=1kb)	0	250.186	4.10745
	chrX	16587700	16588029	330	Promoter (<=1kb)	0	213.745	4.10745
	chrX	16598345	16598674	330	Promoter (<=1kb)	0	205.033	3.64683
	chrX	16637339	16637573	235	Promoter (<=1kb)	0	387.935	4.10745
	chrX	16637742	16638038	297	Promoter (<=1kb)	0	388.557	4.10745
	chrX	16640648	16641005	358	Promoter (<=1kb)	0	625.118	4.10745
	chrX	16644861	16645058	198	Promoter (1-2kb)	1109	552.172	4.10745
	chrX	16650507	16650836	330	Promoter (<=1kb)	-540	261.611	4.10745
	chrX	16651158	16651380	223	Promoter (<=1kb)	0	620.271	4.10745
	chrX	16655172	16655347	176	Promoter (<=1kb)	-12	287.027	4.10745
	chrX	16655665	16655994	330	Promoter (<=1kb)	-97	149.496	2.52565
	chrX	16671077	16671406	330	Promoter (1-2kb)	1630	347.68	4.10745
	chrX	16683874	16684059	186	Promoter (<=1kb)	0	434.673	4.10745
	chrX	16690626	16690741	116	Intron (FBtr0074366/FBgn0259923, intron 2 of 4)	-3093	265.054	4.10745
	chrX	16691507	16691769	263	Intron (FBtr0074366/FBgn0259923, intron 2 of 4)	3375	1250.3	4.10745
	chrX	16695074	16695403	330	Promoter (<=1kb)	0	182.867	3.68613
	chrX	16695763	16695895	133	Promoter (<=1kb)	-236	300.55	4.10745
	chrX	16750998	16751178	181	Promoter (<=1kb)	732	214.235	4.10745
	chrX	16751841	16752103	263	Promoter (<=1kb)	0	687.986	4.10745
	chrX	16772974	16773168	195	Intron (FBtr0301354/FBgn0001250, intron 2 of 11)	7906	501.969	4.10745
	chrX	16778192	16778521	330	Promoter (2-3kb)	2553	206.762	3.64316
	chrX	16781180	16781509	330	Promoter (<=1kb)	-106	175.676	3.47796
	chrX	16782136	16782465	330	Promoter (<=1kb)	80	178.476	3.69434
	chrX	16783273	16783602	330	Promoter (<=1kb)	0	199.987	3.65568
	chrX	16783787	16784116	330	Promoter (<=1kb)	0	155.801	2.85752
	chrX	16786984	16787186	203	Promoter (<=1kb)	0	377.079	4.10745
	chrX	16803310	16803423	114	Promoter (<=1kb)	0	212.387	3.63188
	chrX	16811250	16811510	261	Promoter (<=1kb)	-189	1404.62	4.10745
	chrX	16814552	16814659	108	Promoter (1-2kb)	1286	160.082	2.97893
	chrX	16822177	16822371	195	Intron (FBtr0074336/FBgn0030796, intron 1 of 6)	5298	241.354	4.10745
	chrX	16833171	16833431	261	Promoter (2-3kb)	2089	1013.62	4.10745
	chrX	16839181	16839510	330	3' UTR	-3661	144.075	2.44541
	chrX	16840079	16840178	100	3' UTR	4255	271.891	4.10745
	chrX	16884284	16884613	330	Promoter (<=1kb)	0	210.961	3.63478
	chrX	16931119	16931221	103	Intron (FBtr0074344/FBgn0027556, intron 2 of 5)	5980	144.956	2.45778
	chrX	16932775	16933104	330	Intron (FBtr0074344/FBgn0027556, intron 2 of 5)	7636	174.006	3.48101
	chrX	16940728	16941057	330	Promoter (<=1kb)	0	192.686	3.66761
	chrX	16968621	16968862	242	Promoter (<=1kb)	0	794.167	4.10745
	chrX	17021615	17021706	92	Promoter (<=1kb)	-598	161.098	2.97678
	chrX	17107436	17107520	85	Promoter (<=1kb)	-62	296.617	4.10745
	chrX	17123853	17124138	286	Promoter (1-2kb)	-1325	740.854	4.10745
	chrX	17125103	17125260	158	Promoter (<=1kb)	-203	226.764	4.10745
	chrX	17148186	17148539	354	Promoter (<=1kb)	0	709.622	4.10745
	chrX	17159861	17160071	211	Promoter (<=1kb)	0	605.834	4.10745
	chrX	17175883	17176029	147	5' UTR	7213	319.717	4.10745
	chrX	17176700	17176852	153	5' UTR	6390	217.229	4.10745
	chrX	17178540	17178824	285	5' UTR	4418	1599.48	4.10745
	chrX	17244882	17245211	330	Promoter (<=1kb)	0	202.35	3.6515
	chrX	17249434	17249617	184	Promoter (<=1kb)	0	305.582	4.10745
	chrX	17292064	17292301	238	Promoter (<=1kb)	-395	462.704	4.10745
	chrX	17294141	17294470	330	Promoter (2-3kb)	-2472	164.348	3.15823
	chrX	17297340	17297588	249	Intron (FBtr0339778/FBgn0030838, intron 2 of 4)	3033	525.044	4.10745
	chrX	17298011	17298186	176	Promoter (2-3kb)	2435	472.317	4.10745
	chrX	17299488	17299748	261	Promoter (<=1kb)	873	727.31	4.10745
	chrX	17300791	17300960	170	Promoter (<=1kb)	-170	379.145	4.10745
	chrX	17305640	17305844	205	Downstream (<=300bp)	3170	494.02	4.10745
	chrX	17397094	17397423	330	Promoter (<=1kb)	-55	147.154	2.48245
	chrX	17422100	17422280	181	Promoter (<=1kb)	0	379.892	4.10745
	chrX	17473912	17474241	330	Promoter (1-2kb)	1232	144.405	2.45867
	chrX	17481710	17482039	330	Intron (FBtr0310339/FBgn0263706, intron 2 of 6)	-6237	154.643	2.82418
	chrX	17482989	17483095	107	Intron (FBtr0310339/FBgn0263706, intron 2 of 6)	6220	236.164	4.10745
	chrX	17489875	17490204	330	Promoter (<=1kb)	-560	183.43	3.68499
	chrX	17491265	17491458	194	Promoter (1-2kb)	-1950	369.512	4.10745
	chrX	17501707	17501810	104	Intron (FBtr0310339/FBgn0263706, intron 1 of 6)	5038	152.965	2.70821
	chrX	17507610	17507838	229	Promoter (<=1kb)	-521	797.774	4.10745
	chrX	17509009	17509234	226	Promoter (1-2kb)	-1920	768.491	4.10745
	chrX	17509641	17509970	330	Promoter (2-3kb)	-2552	250.483	4.10745
	chrX	17510215	17510420	206	Intron (FBtr0310338/FBgn0263706, intron 1 of 5)	-3126	266.923	4.10745
	chrX	17510592	17510828	237	Intron (FBtr0310338/FBgn0263706, intron 1 of 5)	-3503	372.266	4.10745
	chrX	17513880	17514042	163	Intron (FBtr0310338/FBgn0263706, intron 1 of 5)	-6791	314.112	4.10745
	chrX	17518269	17518598	330	Intron (FBtr0310338/FBgn0263706, intron 1 of 5)	-11180	189.804	3.67219
	chrX	17531881	17532097	217	Promoter (<=1kb)	-427	489.081	4.10745
	chrX	17532367	17532518	152	Promoter (<=1kb)	-913	191.131	3.66935
	chrX	17578210	17578539	330	Promoter (<=1kb)	-150	237.115	4.10745
	chrX	17588101	17588430	330	Promoter (<=1kb)	-435	225.101	4.10745
	chrX	17599382	17599653	272	Promoter (<=1kb)	0	794.472	4.10745
	chrX	17624938	17625210	273	Promoter (2-3kb)	2685	661.772	4.10745
	chrX	17627819	17627959	141	Promoter (<=1kb)	0	220.49	4.10745
	chrX	17629346	17629675	330	Promoter (<=1kb)	0	169.61	3.34453
	chrX	17632044	17632306	263	Promoter (<=1kb)	0	422.186	4.10745
	chrX	17657167	17657496	330	Promoter (<=1kb)	0	141.332	2.36381
	chrX	17683491	17683579	89	Promoter (<=1kb)	-569	211.769	3.63357
	chrX	17695670	17695999	330	Promoter (1-2kb)	-1283	193.538	3.66636
	chrX	17699019	17699187	169	Promoter (<=1kb)	-289	244.672	4.10745
	chrX	17702798	17703027	230	Promoter (<=1kb)	0	481.789	4.10745
	chrX	17709921	17710132	212	Promoter (<=1kb)	-12	489.738	4.10745
	chrX	17712304	17712633	330	Promoter (2-3kb)	2160	152.942	2.70827
	chrX	17713427	17713604	178	Intron (FBtr0302835/FBgn0261570, intron 1 of 8)	3283	311.919	4.10745
	chrX	17713824	17714060	237	Intron (FBtr0302835/FBgn0261570, intron 1 of 8)	3680	806.253	4.10745
	chrX	17720282	17720611	330	Promoter (2-3kb)	-2592	166.155	3.24229
	chrX	17722999	17723328	330	Promoter (<=1kb)	0	234.423	4.10745
	chrX	17736119	17736448	330	Promoter (1-2kb)	-1965	167.682	3.23919
	chrX	17737040	17737369	330	Promoter (1-2kb)	-1044	157.67	2.93638
	chrX	17738239	17738394	156	Promoter (<=1kb)	-19	387.915	4.10745
	chrX	17742976	17743145	170	Intron (FBtr0302835/FBgn0261570, intron 4 of 8)	4563	399.722	4.10745
	chrX	17751848	17751949	102	3' UTR	13435	298.971	4.10745
	chrX	17799201	17799304	104	Intron (FBtr0074461/FBgn0026058, intron 1 of 3)	8191	158.99	2.93319
	chrX	17802821	17802903	83	Intron (FBtr0074461/FBgn0026058, intron 1 of 3)	11811	178.413	3.69458
	chrX	17814959	17815050	92	Distal Intergenic	4635	152.561	2.68348
	chrX	17820355	17820454	100	Promoter (<=1kb)	-670	319.325	4.10745
	chrX	17827482	17827722	241	Promoter (<=1kb)	0	771.348	4.10745
	chrX	17829194	17829405	212	Promoter (1-2kb)	-1423	278.399	4.10745
	chrX	17829653	17829804	152	Promoter (1-2kb)	-1024	205.313	3.64644
	chrX	17832099	17832428	330	Promoter (1-2kb)	-1005	172.789	3.48421
	chrX	17842041	17842203	163	Promoter (<=1kb)	0	344.327	4.10745
	chrX	17844714	17844923	210	Promoter (<=1kb)	-10	286.7	4.10745
	chrX	17850242	17850506	265	Promoter (<=1kb)	0	606.189	4.10745
	chrX	17852626	17852762	137	Promoter (<=1kb)	0	200.896	3.65434
	chrX	17856569	17856705	137	Promoter (<=1kb)	-269	350.711	4.10745
	chrX	17860821	17861150	330	Promoter (<=1kb)	0	220.108	4.10745
	chrX	17865124	17865453	330	Intron (FBtr0300510/FBgn0259168, intron 7 of 7)	4122	228.233	4.10745
	chrX	17872323	17872652	330	Promoter (2-3kb)	2388	156.704	2.89482
	chrX	17880317	17880598	282	Intron (FBtr0300508/FBgn0259168, intron 1 of 8)	-3120	1708.38	4.10745
	chrX	17881245	17881395	151	Promoter (2-3kb)	-2323	325.444	4.10745
	chrX	17887472	17887649	178	Promoter (<=1kb)	-250	184.896	3.68175
	chrX	17907494	17907823	330	Promoter (<=1kb)	0	229.47	4.10745
	chrX	18083995	18084324	330	Promoter (1-2kb)	1083	187.92	3.67593
	chrX	18085521	18085777	257	Promoter (<=1kb)	0	485.069	4.10745
	chrX	18090483	18090621	139	Promoter (<=1kb)	0	272.847	4.10745
	chrX	18092893	18093132	240	Promoter (<=1kb)	-13	584.057	4.10745
	chrX	18101149	18101478	330	Promoter (<=1kb)	0	297.273	4.10745
	chrX	18101799	18102128	330	Promoter (<=1kb)	0	187.001	3.6777
	chrX	18136148	18136477	330	Promoter (<=1kb)	662	249.722	4.10745
	chrX	18137037	18137170	134	Promoter (<=1kb)	0	363.026	4.10745
	chrX	18137613	18138133	521	Promoter (<=1kb)	0	347.589	4.10745
	chrX	18138243	18138627	385	Promoter (<=1kb)	0	2839.24	4.10745
	chrX	18141072	18141241	170	Promoter (2-3kb)	2446	233.413	4.10745
	chrX	18141474	18141803	330	Promoter (2-3kb)	2848	181.156	3.68934
	chrX	18147048	18147194	147	Distal Intergenic	-8175	212.724	3.63114
	chrX	18239436	18239557	122	Distal Intergenic	3727	359.111	4.10745
	chrX	18284345	18284674	330	3' UTR	7112	196.046	3.66285
	chrX	18294127	18294344	218	Promoter (1-2kb)	1747	573.426	4.10745
	chrX	18366011	18366340	330	Promoter (<=1kb)	-17	189.914	3.67176
	chrX	18366655	18366815	161	Promoter (<=1kb)	94	167.941	3.23897
	chrX	18367236	18367402	167	Promoter (<=1kb)	675	272.285	4.10745
	chrX	18368130	18368382	253	Promoter (1-2kb)	1569	746.892	4.10745
	chrX	18370750	18371044	295	Promoter (<=1kb)	0	978.021	4.10745
	chrX	18405048	18405377	330	Promoter (<=1kb)	-463	142.756	2.3959
	chrX	18405794	18406005	212	Promoter (1-2kb)	-1209	344.768	4.10745
	chrX	18467977	18468133	157	Intron (FBtr0332378/FBgn0052547, intron 1 of 6)	7159	201.633	3.65305
	chrX	18499836	18499970	135	Promoter (<=1kb)	0	399.199	4.10745
	chrX	18505137	18505466	330	Promoter (<=1kb)	0	241.129	4.10745
	chrX	18507212	18507470	259	Promoter (1-2kb)	-1807	837.746	4.10745
	chrX	18512289	18512745	457	Promoter (<=1kb)	0	5482.25	4.10745
	chrX	18515273	18515470	198	Promoter (<=1kb)	0	435.915	4.10745
	chrX	18515942	18516271	330	Promoter (<=1kb)	514	151.652	2.63772
	chrX	18517572	18517712	141	Promoter (2-3kb)	2144	223.326	4.10745
	chrX	18524959	18525288	330	Promoter (2-3kb)	-2514	146.911	2.46807
	chrX	18541980	18542309	330	Intron (FBtr0340363/FBgn0265598, intron 2 of 4)	7317	161.851	3.02909
	chrX	18546856	18547083	228	Intron (FBtr0340363/FBgn0265598, intron 2 of 4)	12193	764.294	4.10745
	chrX	18560937	18561266	330	Intron (FBtr0340363/FBgn0265598, intron 2 of 4)	-4498	142.148	2.38517
	chrX	18634688	18635017	330	Promoter (<=1kb)	0	189.154	3.67385
	chrX	18635390	18635557	168	Promoter (<=1kb)	-482	359.511	4.10745
	chrX	18644953	18645260	308	Promoter (2-3kb)	2307	969.046	4.10745
	chrX	18646072	18646204	133	Promoter (1-2kb)	1363	253.313	4.10745
	chrX	18650429	18650529	101	Promoter (<=1kb)	0	263.82	4.10745
	chrX	18678986	18679142	157	Promoter (2-3kb)	-2225	284.858	4.10745
	chrX	18774813	18775027	215	Promoter (<=1kb)	-201	331.623	4.10745
	chrX	18776028	18776155	128	Promoter (<=1kb)	-343	223.199	4.10745
	chrX	18783612	18783941	330	Promoter (<=1kb)	-118	226.132	4.10745
	chrX	18788281	18788610	330	Promoter (<=1kb)	0	294.884	4.10745
	chrX	18830446	18830600	155	Promoter (<=1kb)	0	369.515	4.10745
	chrX	18834512	18834662	151	Promoter (1-2kb)	1830	207.126	3.64263
	chrX	18837009	18837338	330	Intron (FBtr0074640/FBgn0030964, intron 1 of 5)	4327	316.854	4.10745
	chrX	18843405	18843694	290	Promoter (<=1kb)	0	736.568	4.10745
	chrX	18848591	18848821	231	Promoter (<=1kb)	-25	517.544	4.10745
	chrX	18863728	18863952	225	Promoter (<=1kb)	0	531.135	4.10745
	chrX	18910971	18911088	118	Promoter (1-2kb)	-1264	270.843	4.10745
	chrX	18911726	18912055	330	Promoter (<=1kb)	-297	161.853	3.02903
	chrX	18921021	18921241	221	Distal Intergenic	8669	445.042	4.10745
	chrX	18923558	18923830	273	Distal Intergenic	-6505	594.887	4.10745
	chrX	18930188	18930517	330	Promoter (<=1kb)	0	217.034	4.10745
	chrX	18946997	18947080	84	Intron (FBtr0331156/FBgn0264090, intron 2 of 6)	16638	185.866	3.67964
	chrX	18951547	18951799	253	Intron (FBtr0331156/FBgn0264090, intron 2 of 6)	21188	1084.94	4.10745
	chrX	19008962	19009144	183	Intron (FBtr0331156/FBgn0264090, intron 4 of 6)	-41298	266.563	4.10745
	chrX	19010617	19010715	99	Intron (FBtr0331156/FBgn0264090, intron 4 of 6)	-39727	203.62	3.64943
	chrX	19018136	19018412	277	Intron (FBtr0331156/FBgn0264090, intron 6 of 6)	-32030	1354.44	4.10745
	chrX	19040300	19040629	330	Distal Intergenic	-9813	173.605	3.48199
	chrX	19106925	19107140	216	Distal Intergenic	17248	387.537	4.10745
	chrX	19120513	19120654	142	Distal Intergenic	3734	242.152	4.10745
	chrX	19151978	19152118	141	Promoter (1-2kb)	1340	266.205	4.10745
	chrX	19153259	19153588	330	Promoter (<=1kb)	0	144.977	2.45768
	chrX	19155047	19155329	283	Promoter (1-2kb)	-1589	1586.64	4.10745
	chrX	19156099	19156280	182	Promoter (1-2kb)	1921	304.248	4.10745
	chrX	19162389	19162546	158	Promoter (2-3kb)	2801	309.219	4.10745
	chrX	19166393	19166510	118	Promoter (<=1kb)	572	185.342	3.68085
	chrX	19173017	19173346	330	Promoter (1-2kb)	1554	250.871	4.10745
	chrX	19179940	19180269	330	Promoter (<=1kb)	0	164.468	3.15784
	chrX	19187723	19187922	200	Promoter (<=1kb)	-113	533.892	4.10745
	chrX	19193349	19193678	330	Promoter (<=1kb)	0	380.686	4.10745
	chrX	19208132	19208337	206	Promoter (<=1kb)	0	602.717	4.10745
	chrX	19242027	19242356	330	Promoter (<=1kb)	-187	143.436	2.41981
	chrX	19243422	19243638	217	Promoter (<=1kb)	0	410.839	4.10745
	chrX	19281413	19281527	115	Promoter (1-2kb)	-1064	218.191	4.10745
	chrX	19289381	19289654	274	Intron (FBtr0074684/FBgn0031011, intron 1 of 3)	-4580	1492.03	4.10745
	chrX	19298197	19298491	295	Promoter (<=1kb)	-35	920.858	4.10745
	chrX	19298878	19299061	184	Promoter (<=1kb)	-716	235.634	4.10745
	chrX	19306638	19306967	330	Promoter (<=1kb)	958	157.46	2.93696
	chrX	19308208	19308537	330	Promoter (<=1kb)	-283	147.019	2.46777
	chrX	19322133	19322406	274	Promoter (<=1kb)	-27	794.386	4.10745
	chrX	19323140	19323285	146	Promoter (1-2kb)	-1034	198.556	3.65772
	chrX	19323830	19324059	230	Promoter (1-2kb)	-1724	636.212	4.10745
	chrX	19326875	19326999	125	Distal Intergenic	-4769	216.83	4.10745
	chrX	19348974	19349104	131	Promoter (<=1kb)	-527	207.755	3.64118
	chrX	19352863	19353192	330	Promoter (<=1kb)	0	148.293	2.48023
	chrX	19354736	19354897	162	Promoter (1-2kb)	1555	315.732	4.10745
	chrX	19361427	19361624	198	Intron (FBtr0074707/FBgn0031016, intron 1 of 5)	8246	406.627	4.10745
	chrX	19372290	19372383	94	Intron (FBtr0074707/FBgn0031016, intron 2 of 5)	19109	298.703	4.10745
	chrX	19375508	19375837	330	Intron (FBtr0074707/FBgn0031016, intron 2 of 5)	22327	197.689	3.6602
	chrX	19434451	19434555	105	Intron (FBtr0074707/FBgn0031016, intron 3 of 5)	-40508	223.782	4.10745
	chrX	19453264	19453452	189	Intron (FBtr0074707/FBgn0031016, intron 4 of 5)	-21611	371.939	4.10745
	chrX	19495392	19495518	127	Promoter (<=1kb)	0	345.021	4.10745
	chrX	19496338	19496574	237	Promoter (<=1kb)	-101	592.61	4.10745
	chrX	19496896	19497225	330	Promoter (<=1kb)	221	213.836	4.10745
	chrX	19521823	19522084	262	Promoter (<=1kb)	0	571.73	4.10745
	chrX	19597663	19598160	498	Promoter (<=1kb)	0	686.787	4.10745
	chrX	19601762	19601964	203	Promoter (<=1kb)	0	469.092	4.10745
	chrX	19604045	19604268	224	Promoter (<=1kb)	-931	622.853	4.10745
	chrX	19605017	19605346	330	Promoter (<=1kb)	0	187.699	3.67636
	chrX	19613557	19613775	219	Promoter (<=1kb)	0	653.406	4.10745
	chrX	19616001	19616330	330	Promoter (<=1kb)	0	303.729	4.10745
	chrX	19638320	19638536	217	Promoter (<=1kb)	0	460.027	4.10745
	chrX	19643188	19643359	172	Promoter (<=1kb)	0	366.896	4.10745
	chrX	19645997	19646210	214	Promoter (<=1kb)	0	413.613	4.10745
	chrX	19663939	19664086	148	Promoter (<=1kb)	0	280.153	4.10745
	chrX	19664414	19664743	330	Promoter (<=1kb)	0	155.7	2.85788
	chrX	19666009	19666095	87	Promoter (1-2kb)	-1157	172.618	3.48461
	chrX	19666987	19667195	209	Promoter (<=1kb)	-57	326.441	4.10745
	chrX	19667455	19667753	299	Promoter (<=1kb)	0	654.779	4.10745
	chrX	19668456	19668758	303	Promoter (<=1kb)	-710	1981.56	4.10745
	chrX	19683552	19683786	235	Promoter (<=1kb)	-22	620.842	4.10745
	chrX	19693253	19693528	276	Promoter (<=1kb)	0	1198.37	4.10745
	chrX	19694962	19695291	330	Promoter (<=1kb)	0	158.176	2.93532
	chrX	19696932	19697095	164	Promoter (<=1kb)	0	354.826	4.10745
	chrX	19701620	19701949	330	Promoter (<=1kb)	0	215.37	4.10745
	chrX	19704111	19704308	198	Promoter (<=1kb)	0	495.718	4.10745
	chrX	19744245	19744504	260	Promoter (<=1kb)	0	1027.8	4.10745
	chrX	19748757	19748899	143	Promoter (<=1kb)	-24	462.119	4.10745
	chrX	19750637	19750727	91	Promoter (<=1kb)	-43	302.372	4.10745
	chrX	19770228	19770381	154	Intron (FBtr0307537/FBgn0259789, intron 2 of 2)	-5354	240.992	4.10745
	chrX	19784991	19785131	141	Promoter (1-2kb)	-1443	252.873	4.10745
	chrX	19788920	19789249	330	Promoter (<=1kb)	-764	148.397	2.47973
	chrX	19839177	19839506	330	Intron (FBtr0074805/FBgn0261811, intron 1 of 3)	6181	271.883	4.10745
	chrX	19846950	19847267	318	Promoter (1-2kb)	1211	1743.04	4.10745
	chrX	19847563	19847892	330	Promoter (<=1kb)	586	184.026	3.68368
	chrX	19848454	19848787	334	Promoter (<=1kb)	0	696.876	4.10745
	chrX	19850562	19850817	256	Promoter (<=1kb)	-512	850.548	4.10745
	chrX	19865922	19866231	310	Promoter (<=1kb)	0	930.186	4.10745
	chrX	19867003	19867332	330	Promoter (<=1kb)	809	172.226	3.33928
	chrX	19875127	19875289	163	Promoter (<=1kb)	-460	332.229	4.10745
	chrX	19884352	19884458	107	Promoter (2-3kb)	-2895	217.191	4.10745
	chrX	19889483	19889732	250	Promoter (<=1kb)	328	986.138	4.10745
	chrX	19897275	19897604	330	Intron (FBtr0074800/FBgn0052529, intron 4 of 8)	3446	257.355	4.10745
	chrX	19964361	19964490	130	Promoter (1-2kb)	1185	201.775	3.6526
	chrX	20159819	20160193	375	Promoter (<=1kb)	0	682.785	4.10745
	chrX	20162656	20162870	215	Promoter (<=1kb)	0	640.221	4.10745
	chrX	20165755	20166324	570	Promoter (<=1kb)	0	14409.6	4.10745
	chrX	20166510	20166800	291	Promoter (<=1kb)	0	669.763	4.10745
	chrX	20169982	20170133	152	Promoter (<=1kb)	-1	401.955	4.10745
	chrX	20236193	20236468	276	Promoter (<=1kb)	0	747.564	4.10745
	chrX	20243451	20243780	330	Promoter (<=1kb)	-867	154.407	2.82491
	chrX	20247849	20247969	121	3' UTR	3124	205.005	3.64696
	chrX	20251147	20251340	194	Promoter (<=1kb)	0	377.349	4.10745
	chrX	20257331	20257509	179	Promoter (<=1kb)	-132	485.108	4.10745
	chrX	20342315	20342491	177	Distal Intergenic	-11943	277.175	4.10745
	chrX	20391279	20391517	239	Promoter (<=1kb)	0	601.704	4.10745
	chrX	20429895	20430130	236	Promoter (<=1kb)	-5	453.999	4.10745
	chrX	20488688	20489017	330	Promoter (2-3kb)	2170	191.925	3.66835
	chrX	20495858	20496075	218	Intron (FBtr0301537/FBgn0031118, intron 2 of 14)	-4671	437.839	4.10745
	chrX	20501162	20501305	144	Intron (FBtr0301537/FBgn0031118, intron 2 of 14)	9389	231.222	4.10745
	chrX	20503313	20503412	100	Intron (FBtr0301537/FBgn0031118, intron 2 of 14)	7282	166.488	3.24185
	chrX	20506039	20506194	156	Intron (FBtr0301537/FBgn0031118, intron 2 of 14)	4500	244.592	4.10745
	chrX	20509625	20509792	168	Promoter (<=1kb)	902	318.431	4.10745
	chrX	20510646	20510915	270	Promoter (<=1kb)	0	762.754	4.10745
	chrX	20511576	20511704	129	Promoter (<=1kb)	32	346.481	4.10745
	chrX	20524931	20525275	345	Promoter (<=1kb)	-3	508.557	4.10745
	chrX	20586137	20586268	132	Distal Intergenic	11855	205.006	3.64689
	chrX	20644023	20644352	330	Distal Intergenic	-12770	212.088	3.63249
	chrX	20654849	20655375	527	Promoter (1-2kb)	-1747	832.184	4.10745
	chrX	20721698	20722027	330	Distal Intergenic	13933	162.311	3.02784
	chrX	20723239	20723568	330	Distal Intergenic	12392	186.718	3.67825
	chrX	20760427	20760762	336	Promoter (<=1kb)	191	486.517	4.10745
	chrX	21035340	21035507	168	Promoter (<=1kb)	0	372.895	4.10745
	chrX	21042783	21042950	168	Promoter (<=1kb)	-120	185.734	3.68012
	chrX	21043174	21043503	330	Promoter (<=1kb)	104	157.367	2.93717
	chrX	21044536	21044658	123	Promoter (<=1kb)	-480	304.754	4.10745
	chrX	21044977	21045306	330	Promoter (<=1kb)	0	173.315	3.48256
	chrX	21053144	21053490	347	Promoter (<=1kb)	447	820.814	4.10745
	chrX	21054196	21054460	265	Promoter (<=1kb)	-86	1276.22	4.10745
	chrX	21059041	21059343	303	Intron (FBtr0077246/FBgn0031150, intron 1 of 6)	4495	1458.68	4.10745
	chrX	21060551	21060880	330	5' UTR	3310	167.844	3.23902
	chrX	21073066	21073201	136	Intron (FBtr0077246/FBgn0031150, intron 2 of 6)	-5526	241.865	4.10745
	chrX	21117024	21117195	172	Promoter (<=1kb)	0	332.304	4.10745
	chrX	21124223	21124473	251	Promoter (<=1kb)	589	621.358	4.10745
	chrX	21241977	21242275	299	Intron (FBtr0310652/FBgn0052521, intron 1 of 3)	8873	564.512	4.10745
	chrX	21262518	21262847	330	Intron (FBtr0310652/FBgn0052521, intron 1 of 3)	-11370	148.858	2.49413
	chrX	21265557	21265642	86	Intron (FBtr0310652/FBgn0052521, intron 1 of 3)	-14409	169.22	3.34537
	chrX	21306735	21307064	330	Promoter (<=1kb)	-70	158.373	2.93453
	chrX	21315925	21316094	170	Promoter (<=1kb)	0	409.907	4.10745
	chrX	21319356	21319633	278	Promoter (<=1kb)	-60	438.983	4.10745
	chrX	21324019	21324273	255	Promoter (<=1kb)	0	623.368	4.10745
	chrX	21339457	21339723	267	Promoter (<=1kb)	0	844.281	4.10745
	chrX	21345219	21345429	211	Promoter (<=1kb)	0	724.383	4.10745
	chrX	21350083	21350308	226	Promoter (<=1kb)	0	265.041	4.10745
	chrX	21362944	21363135	192	Promoter (<=1kb)	0	513.86	4.10745
	chrX	21366457	21366667	211	Promoter (1-2kb)	-1372	286.49	4.10745
	chrX	21367652	21367968	317	Promoter (<=1kb)	-71	837.958	4.10745
	chrX	21373884	21374024	141	Promoter (<=1kb)	0	379.349	4.10745
	chrX	21593951	21594226	276	Distal Intergenic	10149	1396.68	4.10745
	chrX	21605103	21605432	330	Promoter (<=1kb)	0	207.252	3.6425
	chrX	21605735	21605854	120	Promoter (<=1kb)	-471	185.599	3.68043
	chrX	21629968	21630108	141	Promoter (<=1kb)	40	146.663	2.46852
	chrX	21630498	21630609	112	Promoter (<=1kb)	-327	155.398	2.8224
	chrX	21631597	21631814	218	Promoter (<=1kb)	-77	446.757	4.10745
	chrX	22443971	22444573	603	Promoter (<=1kb)	0	984.679	4.10745
	chrX	22455607	22455866	260	Promoter (<=1kb)	0	490.094	4.10745
	chrX	22481862	22482191	330	Promoter (<=1kb)	0	231.894	4.10745
	chrX	22509142	22509471	330	Distal Intergenic	5420	177.898	3.69574
	chrX	22833594	22833836	243	Promoter (<=1kb)	-11	794.806	4.10745
	chrX	22837393	22837722	330	Promoter (1-2kb)	-1134	231.904	4.10745
	chrX	23007574	23007737	164	Promoter (<=1kb)	0	383.711	4.10745
	chrX	23010741	23010867	127	Promoter (<=1kb)	-105	282.259	4.10745
	chrX	23013263	23013503	241	Promoter (<=1kb)	0	465.674	4.10745
	chrX	23096688	23096834	147	Promoter (<=1kb)	0	199.89	3.656
	chrX	23097400	23097729	330	Promoter (<=1kb)	0	156.261	2.85647
	chrY	3257123	3257285	163	Promoter (1-2kb)	-1121	143.414	2.41986
	chr2L	21603	21932	330	Promoter (<=1kb)	-20	188.049	3.67563
	chr2L	35537	35866	330	Exon (FBtr0309225/FBgn0051973, exon 5 of 11)	-10382	157.02	2.89434
	chr2L	66676	67005	330	Promoter (<=1kb)	-38	203.797	3.64904
	chr2L	73130	73459	330	Promoter (<=1kb)	-26	363.259	4.10745
	chr2L	81254	81583	330	Distal Intergenic	4906	157.605	2.93654
	chr2L	94566	94895	330	Promoter (<=1kb)	0	207.275	3.64237
	chr2L	106554	106883	330	Promoter (<=1kb)	0	155.769	2.85762
	chr2L	107729	108058	330	Promoter (<=1kb)	0	231.597	4.10745
	chr2L	114527	114691	165	Promoter (<=1kb)	-35	424.975	4.10745
	chr2L	117776	118105	330	Promoter (1-2kb)	-1288	169.29	3.34509
	chr2L	120944	121273	330	Promoter (<=1kb)	-202	145.372	2.45679
	chr2L	129036	129365	330	Promoter (<=1kb)	0	205.863	3.64526
	chr2L	131883	132212	330	Promoter (<=1kb)	0	140.388	2.34449
	chr2L	143185	143343	159	Promoter (<=1kb)	0	428.409	4.10745
	chr2L	155126	155455	330	Promoter (<=1kb)	0	169.568	3.34464
	chr2L	155991	156198	208	Promoter (<=1kb)	0	414.886	4.10745
	chr2L	158868	159052	185	Promoter (<=1kb)	0	403.037	4.10745
	chr2L	161239	161568	330	Promoter (2-3kb)	2207	267.943	4.10745
	chr2L	166602	166759	158	Intron (FBtr0078122/FBgn0016977, intron 2 of 11)	7570	334.684	4.10745
	chr2L	207254	207483	230	Promoter (<=1kb)	0	695.867	4.10745
	chr2L	220754	220862	109	Promoter (1-2kb)	1100	286.468	4.10745
	chr2L	221702	222031	330	Promoter (<=1kb)	0	209.553	3.63726
	chr2L	223429	223661	233	Promoter (<=1kb)	0	784.287	4.10745
	chr2L	224903	225047	145	Promoter (1-2kb)	1384	339.545	4.10745
	chr2L	250798	251043	246	Promoter (<=1kb)	0	566.295	4.10745
	chr2L	252370	252451	82	Promoter (<=1kb)	0	141.684	2.36288
	chr2L	267532	267787	256	Promoter (<=1kb)	-27	721.274	4.10745
	chr2L	271679	271805	127	Promoter (<=1kb)	0	371.583	4.10745
	chr2L	277222	277520	299	Promoter (<=1kb)	-10	749.071	4.10745
	chr2L	283226	283336	111	Promoter (<=1kb)	0	389.626	4.10745
	chr2L	285727	285943	217	Promoter (<=1kb)	-1	475.793	4.10745
	chr2L	286569	286667	99	Promoter (<=1kb)	-38	352.363	4.10745
	chr2L	292215	292544	330	Promoter (<=1kb)	0	280.493	4.10745
	chr2L	294448	294777	330	Promoter (<=1kb)	0	202.309	3.6517
	chr2L	294979	295167	189	Promoter (<=1kb)	0	300.397	4.10745
	chr2L	297666	297996	331	Promoter (<=1kb)	0	760.969	4.10745
	chr2L	305664	305923	260	Promoter (<=1kb)	-12	692.333	4.10745
	chr2L	312078	312407	330	Promoter (1-2kb)	1878	145.284	2.45694
	chr2L	357855	358026	172	Promoter (<=1kb)	0	480.642	4.10745
	chr2L	382845	383174	330	Intron (FBtr0078053/FBgn0000061, intron 1 of 4)	4733	148.167	2.48054
	chr2L	414753	415076	324	Promoter (<=1kb)	0	953.754	4.10745
	chr2L	419782	420013	232	Promoter (<=1kb)	0	475.195	4.10745
	chr2L	421386	421662	277	Promoter (<=1kb)	0	931.46	4.10745
	chr2L	425637	425769	133	Promoter (2-3kb)	2764	267.093	4.10745
	chr2L	427456	427624	169	Distal Intergenic	-3603	260.79	4.10745
	chr2L	430974	431088	115	Promoter (<=1kb)	-139	192.523	3.66786
	chr2L	441965	442257	293	Promoter (2-3kb)	2426	1590.97	4.10745
	chr2L	468800	469022	223	Promoter (2-3kb)	2533	731.817	4.10745
	chr2L	469951	470280	330	Promoter (1-2kb)	1275	296.044	4.10745
	chr2L	470733	470909	177	Promoter (<=1kb)	646	236.154	4.10745
	chr2L	471629	471958	330	Promoter (<=1kb)	-74	179.51	3.69241
	chr2L	472350	472624	275	Promoter (<=1kb)	-150	1160.6	4.10745
	chr2L	472960	473054	95	Promoter (<=1kb)	0	257.76	4.10745
	chr2L	479915	480225	311	Promoter (<=1kb)	-227	2598.06	4.10745
	chr2L	480916	481270	355	Promoter (1-2kb)	-1228	5139.38	4.10745
	chr2L	481864	482077	214	Promoter (2-3kb)	-2176	478.151	4.10745
	chr2L	484215	484544	330	Intron (FBtr0333012/FBgn0003963, intron 1 of 7)	-4527	204.074	3.64846
	chr2L	485738	486008	271	Intron (FBtr0333012/FBgn0003963, intron 1 of 7)	-4827	944.536	4.10745
	chr2L	490175	490391	217	Promoter (<=1kb)	-444	355.513	4.10745
	chr2L	510484	510699	216	Intron (FBtr0333012/FBgn0003963, intron 1 of 7)	-8248	515.068	4.10745
	chr2L	512151	512337	187	Intron (FBtr0333012/FBgn0003963, intron 1 of 7)	-9915	354.008	4.10745
	chr2L	512944	513273	330	Intron (FBtr0333012/FBgn0003963, intron 1 of 7)	-10193	229.545	4.10745
	chr2L	516078	516354	277	Intron (FBtr0333012/FBgn0003963, intron 1 of 7)	-7112	1247.36	4.10745
	chr2L	520702	520974	273	Promoter (2-3kb)	-2492	1455.11	4.10745
	chr2L	521440	521769	330	Promoter (1-2kb)	-1697	168.365	3.34705
	chr2L	521974	522243	270	Promoter (1-2kb)	-1223	1347.39	4.10745
	chr2L	522878	523053	176	Promoter (<=1kb)	-413	280.563	4.10745
	chr2L	523573	523902	330	Promoter (<=1kb)	0	277.627	4.10745
	chr2L	526981	527310	330	Intron (FBtr0333012/FBgn0003963, intron 2 of 7)	3245	183.864	3.68404
	chr2L	540559	540752	194	Promoter (1-2kb)	1828	262.333	4.10745
	chr2L	540990	541233	244	Promoter (1-2kb)	1347	595.635	4.10745
	chr2L	542435	542764	330	Promoter (<=1kb)	0	237.7	4.10745
	chr2L	544625	544787	163	Promoter (<=1kb)	0	532.118	4.10745
	chr2L	560186	560515	330	Promoter (<=1kb)	0	186.079	3.67952
	chr2L	564034	564216	183	Promoter (<=1kb)	0	484.441	4.10745
	chr2L	568094	568365	272	Promoter (<=1kb)	0	650.757	4.10745
	chr2L	574267	574550	284	Promoter (<=1kb)	0	303.181	4.10745
	chr2L	602425	602600	176	Promoter (<=1kb)	-213	256.831	4.10745
	chr2L	604137	604466	330	Promoter (1-2kb)	1324	219.241	4.10745
	chr2L	606288	606484	197	Promoter (<=1kb)	374	364.692	4.10745
	chr2L	683208	683370	163	Intron (FBtr0078045/FBgn0284247, intron 2 of 11)	-27198	220.876	4.10745
	chr2L	712322	712651	330	Promoter (1-2kb)	1754	188.783	3.67471
	chr2L	715414	715728	315	Promoter (<=1kb)	-431	2293.58	4.10745
	chr2L	716739	716855	117	Promoter (1-2kb)	-1756	241.241	4.10745
	chr2L	718576	718740	165	Distal Intergenic	-3593	314.904	4.10745
	chr2L	740202	740322	121	Promoter (1-2kb)	1469	365.86	4.10745
	chr2L	810312	810641	330	Promoter (<=1kb)	0	154.801	2.82376
	chr2L	815826	816155	330	Promoter (<=1kb)	0	271.303	4.10745
	chr2L	819729	819889	161	Promoter (<=1kb)	-75	294.76	4.10745
	chr2L	821281	821487	207	Promoter (<=1kb)	0	664.718	4.10745
	chr2L	825817	826006	190	Promoter (<=1kb)	0	606.426	4.10745
	chr2L	827534	827780	247	Promoter (1-2kb)	1565	509.434	4.10745
	chr2L	838083	838284	202	Intron (FBtr0302121/FBgn0020304, intron 1 of 5)	4659	645.035	4.10745
	chr2L	841815	842020	206	Promoter (<=1kb)	923	699.765	4.10745
	chr2L	845415	845658	244	Promoter (2-3kb)	-2472	1252.53	4.10745
	chr2L	846203	846463	261	Intron (FBtr0302120/FBgn0020304, intron 1 of 5)	-3260	810.621	4.10745
	chr2L	851035	851275	241	Promoter (<=1kb)	0	805.872	4.10745
	chr2L	852648	852851	204	Promoter (<=1kb)	0	662.323	4.10745
	chr2L	855281	855501	221	Promoter (<=1kb)	0	526.395	4.10745
	chr2L	856050	856379	330	Promoter (<=1kb)	579	270.891	4.10745
	chr2L	856703	856955	253	Promoter (<=1kb)	-448	1187.72	4.10745
	chr2L	858203	858422	220	Promoter (<=1kb)	661	687.468	4.10745
	chr2L	858919	859248	330	Promoter (<=1kb)	-949	182.754	3.68643
	chr2L	865907	866199	293	Promoter (<=1kb)	-46	2219.5	4.10745
	chr2L	867369	867636	268	Promoter (<=1kb)	377	1276.2	4.10745
	chr2L	868447	868595	149	Promoter (<=1kb)	-93	212.125	3.63229
	chr2L	869845	869945	101	Promoter (<=1kb)	0	230.243	4.10745
	chr2L	870850	871113	264	Promoter (<=1kb)	0	576.86	4.10745
	chr2L	871507	871629	123	Promoter (<=1kb)	412	344.31	4.10745
	chr2L	889893	890121	229	Distal Intergenic	-4752	619.648	4.10745
	chr2L	892570	892725	156	Distal Intergenic	5325	302.217	4.10745
	chr2L	895457	895786	330	Promoter (2-3kb)	2264	196.224	3.6626
	chr2L	897260	897389	130	Promoter (<=1kb)	661	275.518	4.10745
	chr2L	901339	901668	330	Promoter (<=1kb)	0	309.235	4.10745
	chr2L	907286	907615	330	Distal Intergenic	3257	145.427	2.45659
	chr2L	935947	936039	93	Intron (FBtr0077949/FBgn0028481, intron 2 of 10)	13154	157.895	2.9359
	chr2L	937039	937194	156	Intron (FBtr0077949/FBgn0028481, intron 2 of 10)	14246	255.403	4.10745
	chr2L	974218	974346	129	Distal Intergenic	16954	250.621	4.10745
	chr2L	1006589	1006719	131	Distal Intergenic	-15289	302.886	4.10745
	chr2L	1049366	1049695	330	Promoter (1-2kb)	-1313	150.138	2.5597
	chr2L	1062975	1063133	159	Intron (FBtr0077993/FBgn0003310, intron 1 of 4)	14678	262.158	4.10745
	chr2L	1065127	1065294	168	Intron (FBtr0077993/FBgn0003310, intron 1 of 4)	12517	416.527	4.10745
	chr2L	1070479	1070638	160	Intron (FBtr0077993/FBgn0003310, intron 1 of 4)	7173	304.033	4.10745
	chr2L	1071101	1071212	112	Intron (FBtr0077993/FBgn0003310, intron 1 of 4)	6599	158.073	2.93548
	chr2L	1072190	1072540	351	Intron (FBtr0077993/FBgn0003310, intron 1 of 4)	5271	1551.69	4.10745
	chr2L	1074558	1074836	279	Promoter (2-3kb)	2975	1502.77	4.10745
	chr2L	1075815	1076114	300	Promoter (1-2kb)	1697	2885.05	4.10745
	chr2L	1077801	1078017	217	Promoter (<=1kb)	0	794.049	4.10745
	chr2L	1091666	1091995	330	Intron (FBtr0332570/FBgn0031299, intron 2 of 8)	10509	158.35	2.93463
	chr2L	1094775	1095011	237	Intron (FBtr0332570/FBgn0031299, intron 2 of 8)	7493	337.849	4.10745
	chr2L	1119362	1119589	228	Promoter (<=1kb)	-331	699.766	4.10745
	chr2L	1121951	1122280	330	Promoter (2-3kb)	-2920	213.923	4.10745
	chr2L	1123485	1123634	150	Intron (FBtr0077987/FBgn0016926, intron 2 of 4)	-4454	308.843	4.10745
	chr2L	1123619	1123804	186	Intron (FBtr0077987/FBgn0016926, intron 2 of 4)	-4588	172.626	3.48456
	chr2L	1129173	1129311	139	Promoter (<=1kb)	-5	153.16	2.7347
	chr2L	1142722	1142931	210	Promoter (<=1kb)	0	642.123	4.10745
	chr2L	1144463	1144665	203	Promoter (1-2kb)	1262	595.341	4.10745
	chr2L	1145055	1145229	175	Promoter (1-2kb)	1854	458.088	4.10745
	chr2L	1156858	1156980	123	Promoter (<=1kb)	-547	203.179	3.64995
	chr2L	1158222	1158402	181	Promoter (<=1kb)	0	248.698	4.10745
	chr2L	1185625	1185865	241	Promoter (<=1kb)	0	737.803	4.10745
	chr2L	1207546	1207751	206	Distal Intergenic	3331	520.98	4.10745
	chr2L	1213709	1213869	161	Promoter (1-2kb)	1424	271.132	4.10745
	chr2L	1214589	1214771	183	Promoter (<=1kb)	522	330.002	4.10745
	chr2L	1218183	1218392	210	Promoter (<=1kb)	-398	373.552	4.10745
	chr2L	1230807	1230973	167	Distal Intergenic	-9063	275.658	4.10745
	chr2L	1287789	1287900	112	Intron (FBtr0077921/FBgn0041097, intron 9 of 11)	31372	151.625	2.63777
	chr2L	1312439	1312605	167	Distal Intergenic	-16556	250.848	4.10745
	chr2L	1316523	1316692	170	Distal Intergenic	-12469	327.776	4.10745
	chr2L	1362343	1362468	126	Promoter (<=1kb)	-522	234.163	4.10745
	chr2L	1365742	1366071	330	Promoter (1-2kb)	-1925	173.651	3.48187
	chr2L	1393766	1393899	134	Intron (FBtr0077941/FBgn0002543, intron 5 of 13)	-12440	240.025	4.10745
	chr2L	1402767	1403096	330	Intron (FBtr0077941/FBgn0002543, intron 1 of 13)	17357	147.679	2.48164
	chr2L	1409749	1410078	330	Intron (FBtr0077941/FBgn0002543, intron 1 of 13)	10375	151.699	2.63752
	chr2L	1420257	1420586	330	Promoter (<=1kb)	0	337.571	4.10745
	chr2L	1422815	1423075	261	Promoter (2-3kb)	-2362	1066.91	4.10745
	chr2L	1424954	1425169	216	Distal Intergenic	-3305	713.658	4.10745
	chr2L	1426839	1427071	233	Promoter (1-2kb)	-1403	434.986	4.10745
	chr2L	1427882	1428102	221	Promoter (<=1kb)	-372	750.701	4.10745
	chr2L	1428426	1428606	181	Promoter (<=1kb)	0	269.106	4.10745
	chr2L	1433736	1434048	313	Promoter (1-2kb)	1025	2558.63	4.10745
	chr2L	1440060	1440365	306	Promoter (2-3kb)	-2262	894.708	4.10745
	chr2L	1445170	1445336	167	Promoter (2-3kb)	2444	279.494	4.10745
	chr2L	1456334	1456557	224	Distal Intergenic	13608	524.608	4.10745
	chr2L	1456918	1457058	141	Distal Intergenic	14192	153.804	2.76195
	chr2L	1462140	1462430	291	Distal Intergenic	19414	946.851	4.10745
	chr2L	1470161	1470266	106	Distal Intergenic	-22029	153.929	2.76154
	chr2L	1470918	1471008	91	Distal Intergenic	-21287	229.223	4.10745
	chr2L	1473548	1473738	191	Distal Intergenic	-18557	450.963	4.10745
	chr2L	1485940	1486269	330	Distal Intergenic	-6026	212.53	3.63161
	chr2L	1509920	1510031	112	Distal Intergenic	-7016	173.268	3.48279
	chr2L	1557981	1558310	330	Promoter (2-3kb)	2852	168.139	3.2383
	chr2L	1568654	1568983	330	Intron (FBtr0310017/FBgn0261509, intron 2 of 9)	13525	212.181	3.63209
	chr2L	1579347	1579561	215	Intron (FBtr0310017/FBgn0261509, intron 2 of 9)	7594	533.372	4.10745
	chr2L	1590249	1590472	224	Intron (FBtr0310017/FBgn0261509, intron 2 of 9)	-3094	682.747	4.10745
	chr2L	1611179	1611444	266	Promoter (<=1kb)	0	354.431	4.10745
	chr2L	1614119	1614355	237	Promoter (<=1kb)	0	860.766	4.10745
	chr2L	1615855	1616081	227	Promoter (1-2kb)	-1695	579.652	4.10745
	chr2L	1620884	1621089	206	Promoter (2-3kb)	2389	299.177	4.10745
	chr2L	1624848	1625068	221	Promoter (<=1kb)	953	725.52	4.10745
	chr2L	1628238	1628397	160	Promoter (2-3kb)	-2217	225.817	4.10745
	chr2L	1629634	1629837	204	Distal Intergenic	-3613	441.037	4.10745
	chr2L	1632691	1632957	267	Distal Intergenic	-6670	724.526	4.10745
	chr2L	1634202	1634370	169	Distal Intergenic	-8181	296.008	4.10745
	chr2L	1638758	1638958	201	Distal Intergenic	8205	516.532	4.10745
	chr2L	1643433	1643552	120	Distal Intergenic	3611	207.998	3.64078
	chr2L	1646615	1646844	230	Promoter (<=1kb)	319	473.123	4.10745
	chr2L	1648650	1648932	283	Promoter (1-2kb)	-1487	1428.35	4.10745
	chr2L	1649241	1649436	196	Promoter (1-2kb)	-1822	185.226	3.68133
	chr2L	1650108	1650301	194	Promoter (<=1kb)	-957	381.69	4.10745
	chr2L	1704728	1705057	330	Promoter (<=1kb)	0	189.745	3.67237
	chr2L	1710345	1710559	215	Promoter (<=1kb)	0	794.407	4.10745
	chr2L	1723026	1723355	330	Promoter (1-2kb)	1033	236.822	4.10745
	chr2L	1724336	1724537	202	Promoter (<=1kb)	0	433.179	4.10745
	chr2L	1727744	1727992	249	Promoter (<=1kb)	-27	283.674	4.10745
	chr2L	1728580	1728909	330	Promoter (<=1kb)	0	227.189	4.10745
	chr2L	1729681	1729838	158	Promoter (<=1kb)	-45	263.984	4.10745
	chr2L	1732218	1732547	330	Promoter (<=1kb)	0	384.247	4.10745
	chr2L	1737069	1737335	267	Promoter (<=1kb)	-132	868.284	4.10745
	chr2L	1738158	1738355	198	Promoter (<=1kb)	691	345.447	4.10745
	chr2L	1837835	1838007	173	Promoter (1-2kb)	1297	319.048	4.10745
	chr2L	1884394	1884677	284	Promoter (<=1kb)	0	682.422	4.10745
	chr2L	1909746	1910075	330	Promoter (1-2kb)	-1667	150.891	2.61738
	chr2L	1911347	1911676	330	Promoter (<=1kb)	-66	225.854	4.10745
	chr2L	1913037	1913366	330	Promoter (1-2kb)	1295	162.785	3.02691
	chr2L	1916551	1916753	203	Intron (FBtr0113012/FBgn0031374, intron 3 of 18)	4809	455.819	4.10745
	chr2L	1925999	1926187	189	Promoter (1-2kb)	-1566	324.658	4.10745
	chr2L	1959540	1959712	173	Intron (FBtr0330200/FBgn0031375, intron 1 of 1)	-4987	321.286	4.10745
	chr2L	1960143	1960275	133	Intron (FBtr0330200/FBgn0031375, intron 1 of 1)	-5151	295.63	4.10745
	chr2L	1974016	1974170	155	Promoter (<=1kb)	0	403.606	4.10745
	chr2L	1980709	1980936	228	Promoter (<=1kb)	0	487.871	4.10745
	chr2L	1981987	1982316	330	Promoter (<=1kb)	0	202.148	3.65221
	chr2L	1986701	1987030	330	Promoter (<=1kb)	0	169.04	3.34571
	chr2L	1987742	1988071	330	Promoter (<=1kb)	0	198.546	3.65779
	chr2L	2009638	2009967	330	Promoter (<=1kb)	0	300.761	4.10745
	chr2L	2014016	2014345	330	Promoter (<=1kb)	230	150.949	2.61723
	chr2L	2037507	2037794	288	Promoter (<=1kb)	0	1363.64	4.10745
	chr2L	2084465	2084645	181	Promoter (1-2kb)	1103	345.177	4.10745
	chr2L	2090360	2090492	133	Intron (FBtr0334783/FBgn0053516, intron 2 of 7)	6998	203.001	3.65028
	chr2L	2130149	2130416	268	Promoter (<=1kb)	-397	334.277	4.10745
	chr2L	2130482	2130733	252	Promoter (<=1kb)	-80	239.554	4.10745
	chr2L	2145035	2145321	287	Promoter (<=1kb)	0	1395.19	4.10745
	chr2L	2145474	2145803	330	Promoter (<=1kb)	-287	234.775	4.10745
	chr2L	2147165	2147556	392	Promoter (<=1kb)	0	772.804	4.10745
	chr2L	2162748	2162897	150	Promoter (1-2kb)	-1221	205.33	3.64637
	chr2L	2163539	2163795	257	Promoter (2-3kb)	-2012	1282.01	4.10745
	chr2L	2164830	2165080	251	Intron (FBtr0077850/FBgn0000097, intron 1 of 3)	-3303	735.525	4.10745
	chr2L	2167287	2167616	330	Intron (FBtr0077850/FBgn0000097, intron 1 of 3)	-5760	268.625	4.10745
	chr2L	2168231	2168560	330	Intron (FBtr0077850/FBgn0000097, intron 1 of 3)	-6704	246.927	4.10745
	chr2L	2177741	2177843	103	Promoter (<=1kb)	911	200.229	3.65536
	chr2L	2179496	2179757	262	Promoter (<=1kb)	-742	575.044	4.10745
	chr2L	2180094	2180379	286	Promoter (1-2kb)	-1340	1015.63	4.10745
	chr2L	2182373	2182565	193	Promoter (<=1kb)	411	245.558	4.10745
	chr2L	2182784	2183055	272	Promoter (<=1kb)	822	1074.46	4.10745
	chr2L	2188023	2188136	114	Promoter (<=1kb)	-53	206.167	3.64408
	chr2L	2189085	2189327	243	Promoter (<=1kb)	78	856.399	4.10745
	chr2L	2192332	2192559	228	Promoter (<=1kb)	0	500.663	4.10745
	chr2L	2193473	2193638	166	Promoter (<=1kb)	-463	428.346	4.10745
	chr2L	2196529	2196858	330	Promoter (1-2kb)	1054	169.949	3.34358
	chr2L	2197062	2197195	134	Promoter (<=1kb)	717	318.44	4.10745
	chr2L	2199209	2199490	282	Promoter (1-2kb)	-1297	1460.1	4.10745
	chr2L	2201089	2201403	315	Distal Intergenic	-3177	701.272	4.10745
	chr2L	2202230	2202583	354	Distal Intergenic	3583	4569.17	4.10745
	chr2L	2213995	2214324	330	Promoter (<=1kb)	0	237.756	4.10745
	chr2L	2217095	2217424	330	Promoter (<=1kb)	0	259.942	4.10745
	chr2L	2220524	2220853	330	Promoter (<=1kb)	0	232.388	4.10745
	chr2L	2221648	2222040	393	Promoter (<=1kb)	-49	1612.18	4.10745
	chr2L	2226239	2226535	297	Promoter (<=1kb)	0	744.555	4.10745
	chr2L	2227435	2227617	183	Promoter (<=1kb)	0	503.285	4.10745
	chr2L	2249686	2249812	127	Promoter (1-2kb)	1463	174.835	3.47958
	chr2L	2357255	2357584	330	Promoter (<=1kb)	0	153.03	2.73501
	chr2L	2363890	2364096	207	Promoter (<=1kb)	-386	476.925	4.10745
	chr2L	2365227	2365393	167	Promoter (<=1kb)	0	288.739	4.10745
	chr2L	2374501	2374748	248	Promoter (<=1kb)	0	822.976	4.10745
	chr2L	2375688	2375953	266	Promoter (<=1kb)	0	1050.93	4.10745
	chr2L	2376254	2376583	330	Promoter (<=1kb)	0	144.93	2.45783
	chr2L	2380844	2381160	317	Promoter (<=1kb)	0	2222.65	4.10745
	chr2L	2383049	2383211	163	Promoter (<=1kb)	0	349.219	4.10745
	chr2L	2420563	2420760	198	Promoter (<=1kb)	-70	247.41	4.10745
	chr2L	2426542	2426757	216	Promoter (1-2kb)	1124	639.436	4.10745
	chr2L	2433522	2433766	245	Intron (FBtr0077771/FBgn0000490, intron 1 of 2)	5150	1064.89	4.10745
	chr2L	2438856	2439185	330	Intron (FBtr0077771/FBgn0000490, intron 1 of 2)	10484	167.538	3.23958
	chr2L	2486967	2487129	163	Distal Intergenic	5542	327.234	4.10745
	chr2L	2492632	2492969	338	Promoter (<=1kb)	0	1062.55	4.10745
	chr2L	2494337	2494507	171	Promoter (1-2kb)	1382	140.395	2.34439
	chr2L	2494746	2494891	146	Promoter (1-2kb)	1791	192.747	3.66748
	chr2L	2528227	2528389	163	Distal Intergenic	5180	327.542	4.10745
	chr2L	2574994	2575168	175	Promoter (<=1kb)	0	394.137	4.10745
	chr2L	2580085	2580257	173	Promoter (<=1kb)	0	364.637	4.10745
	chr2L	2585391	2585641	251	Promoter (<=1kb)	0	931.109	4.10745
	chr2L	2720474	2720624	151	Distal Intergenic	-5050	228.471	4.10745
	chr2L	2721433	2721620	188	Distal Intergenic	-4054	324.241	4.10745
	chr2L	2723256	2723359	104	Promoter (2-3kb)	-2315	220.914	4.10745
	chr2L	2729881	2730210	330	Promoter (<=1kb)	0	153.064	2.7348
	chr2L	2731419	2731748	330	Promoter (<=1kb)	583	204.137	3.64833
	chr2L	2734287	2734616	330	Promoter (1-2kb)	-1198	181.966	3.68786
	chr2L	2739881	2740115	235	Promoter (<=1kb)	0	581.399	4.10745
	chr2L	2748520	2748841	322	Promoter (<=1kb)	-33	754.803	4.10745
	chr2L	2749246	2749327	82	Promoter (<=1kb)	0	159.502	2.93207
	chr2L	2749522	2749851	330	Promoter (<=1kb)	-209	218.103	4.10745
	chr2L	2750308	2750571	264	Promoter (<=1kb)	-161	543.809	4.10745
	chr2L	2750734	2751063	330	Promoter (<=1kb)	0	209.27	3.63779
	chr2L	2751865	2752081	217	Promoter (<=1kb)	-364	413.904	4.10745
	chr2L	2752870	2753082	213	Promoter (<=1kb)	0	381.667	4.10745
	chr2L	2754503	2754896	394	Promoter (1-2kb)	1270	427.088	4.10745
	chr2L	2759664	2759945	282	Promoter (<=1kb)	0	659.076	4.10745
	chr2L	2765925	2766244	320	Promoter (<=1kb)	0	515.577	4.10745
	chr2L	2767713	2768042	330	Promoter (<=1kb)	0	389.842	4.10745
	chr2L	2769978	2770187	210	Promoter (<=1kb)	0	437.206	4.10745
	chr2L	2830327	2830478	152	Promoter (<=1kb)	-79	196.585	3.66172
	chr2L	2855411	2855740	330	Promoter (<=1kb)	38	284.117	4.10745
	chr2L	2855948	2856203	256	Promoter (<=1kb)	0	542.064	4.10745
	chr2L	2857003	2857222	220	Promoter (<=1kb)	0	539.059	4.10745
	chr2L	2864639	2864968	330	Promoter (2-3kb)	2102	294.023	4.10745
	chr2L	2873151	2873480	330	Promoter (1-2kb)	1009	160.197	2.97872
	chr2L	2874497	2874608	112	Promoter (<=1kb)	-8	264.137	4.10745
	chr2L	2878240	2878487	248	Promoter (<=1kb)	0	453.524	4.10745
	chr2L	2878911	2879240	330	Promoter (<=1kb)	0	579.311	4.10745
	chr2L	2883062	2883227	166	Promoter (<=1kb)	0	309.989	4.10745
	chr2L	2885172	2885436	265	Promoter (<=1kb)	0	921.905	4.10745
	chr2L	2885820	2885913	94	Promoter (<=1kb)	0	353.035	4.10745
	chr2L	2897033	2897265	233	Intron (FBtr0077632/FBgn0041111, intron 2 of 12)	6862	503.453	4.10745
	chr2L	2906120	2906449	330	Intron (FBtr0077632/FBgn0041111, intron 2 of 12)	15949	154.431	2.8247
	chr2L	2941462	2941591	130	Intron (FBtr0077632/FBgn0041111, intron 3 of 12)	-4972	209.506	3.63739
	chr2L	2954547	2954628	82	Promoter (<=1kb)	-134	270.001	4.10745
	chr2L	2967021	2967174	154	Promoter (2-3kb)	2464	326.04	4.10745
	chr2L	2969675	2969756	82	Promoter (<=1kb)	-37	336.73	4.10745
	chr2L	2972485	2972568	84	Promoter (<=1kb)	0	231.491	4.10745
	chr2L	2972728	2972932	205	Promoter (<=1kb)	0	149.507	2.5256
	chr2L	2976918	2977189	272	Promoter (<=1kb)	0	511.225	4.10745
	chr2L	2978850	2979464	615	Promoter (<=1kb)	0	25972.1	4.10745
	chr2L	2979550	2979836	287	Promoter (<=1kb)	-262	424.983	4.10745
	chr2L	2987910	2988146	237	Promoter (<=1kb)	0	511.85	4.10745
	chr2L	2992659	2992988	330	Promoter (<=1kb)	0	693.336	4.10745
	chr2L	2999108	2999294	187	Promoter (<=1kb)	0	568.861	4.10745
	chr2L	3003497	3003709	213	Intron (FBtr0077646/FBgn0031488, intron 1 of 3)	4211	573.581	4.10745
	chr2L	3004703	3005032	330	Intron (FBtr0077646/FBgn0031488, intron 1 of 3)	5417	206.069	3.64434
	chr2L	3029112	3029318	207	Promoter (<=1kb)	0	470.081	4.10745
	chr2L	3030442	3030546	105	Promoter (<=1kb)	0	214.685	4.10745
	chr2L	3037274	3037538	265	Promoter (<=1kb)	0	656.232	4.10745
	chr2L	3039802	3040051	250	Promoter (<=1kb)	0	511.706	4.10745
	chr2L	3042141	3042470	330	Promoter (<=1kb)	-81	311.577	4.10745
	chr2L	3086462	3086791	330	Promoter (<=1kb)	0	172.613	3.48473
	chr2L	3092656	3092737	82	Promoter (1-2kb)	-1745	155.329	2.82261
	chr2L	3100937	3101095	159	Intron (FBtr0110903/FBgn0015600, intron 1 of 8)	-6242	234.727	4.10745
	chr2L	3114165	3114494	330	Promoter (1-2kb)	-1829	156.063	2.8572
	chr2L	3144836	3144994	159	Promoter (<=1kb)	-50	519.124	4.10745
	chr2L	3145615	3145944	330	Promoter (<=1kb)	0	203.064	3.65021
	chr2L	3149273	3149602	330	5' UTR	3151	219.796	4.10745
	chr2L	3153238	3153577	340	Promoter (<=1kb)	-485	2951.94	4.10745
	chr2L	3159285	3159614	330	Promoter (<=1kb)	29	163.297	3.02561
	chr2L	3170978	3171307	330	Promoter (<=1kb)	0	232.797	4.10745
	chr2L	3301937	3302584	648	Promoter (<=1kb)	546	438.287	4.10745
	chr2L	3301937	3302584	648	Promoter (<=1kb)	546	5312.9	4.10745
	chr2L	3302878	3303207	330	Promoter (<=1kb)	0	196.196	3.66266
	chr2L	3303576	3303748	173	Promoter (<=1kb)	-352	354.325	4.10745
	chr2L	3319861	3320047	187	Promoter (<=1kb)	0	492.528	4.10745
	chr2L	3338876	3339140	265	Intron (FBtr0089979/FBgn0020445, intron 2 of 8)	6062	1168.96	4.10745
	chr2L	3345692	3346021	330	Intron (FBtr0089979/FBgn0020445, intron 2 of 8)	8808	211.589	3.63384
	chr2L	3348189	3348438	250	Intron (FBtr0089979/FBgn0020445, intron 2 of 8)	6391	937.798	4.10745
	chr2L	3354924	3355163	240	Promoter (<=1kb)	-95	855.748	4.10745
	chr2L	3372468	3372797	330	Promoter (<=1kb)	575	235.803	4.10745
	chr2L	3373362	3373568	207	Promoter (<=1kb)	0	610.7	4.10745
	chr2L	3376720	3377010	291	Promoter (<=1kb)	0	905.891	4.10745
	chr2L	3435181	3435362	182	Distal Intergenic	-8462	393.324	4.10745
	chr2L	3437082	3437322	241	Distal Intergenic	-8670	898.646	4.10745
	chr2L	3440368	3440615	248	Distal Intergenic	-5377	969.679	4.10745
	chr2L	3444878	3445069	192	Promoter (<=1kb)	-923	502.682	4.10745
	chr2L	3469913	3470151	239	Promoter (<=1kb)	0	774.311	4.10745
	chr2L	3472386	3472498	113	Promoter (<=1kb)	-105	323.538	4.10745
	chr2L	3475975	3476304	330	Promoter (<=1kb)	-39	314.281	4.10745
	chr2L	3477224	3477553	330	Promoter (<=1kb)	373	180.686	3.69023
	chr2L	3478338	3478667	330	Promoter (<=1kb)	0	255.221	4.10745
	chr2L	3480478	3480807	330	Promoter (1-2kb)	1956	143.666	2.41951
	chr2L	3530280	3530609	330	Promoter (<=1kb)	0	232.231	4.10745
	chr2L	3533198	3533424	227	Promoter (2-3kb)	2409	501.976	4.10745
	chr2L	3534570	3534741	172	Distal Intergenic	-3103	300.32	4.10745
	chr2L	3535390	3535719	330	Promoter (2-3kb)	-2125	145.866	2.47042
	chr2L	3548937	3549266	330	Distal Intergenic	9204	163.285	3.02566
	chr2L	3550664	3550993	330	Distal Intergenic	10931	145.516	2.45644
	chr2L	3552897	3553031	135	Distal Intergenic	-9007	246.128	4.10745
	chr2L	3555206	3555369	164	Distal Intergenic	-6669	281.948	4.10745
	chr2L	3555787	3555905	119	Distal Intergenic	-6133	161.545	3.02995
	chr2L	3559804	3559946	143	Promoter (2-3kb)	-2092	157.609	2.93649
	chr2L	3566641	3566855	215	Distal Intergenic	-3101	430.014	4.10745
	chr2L	3569901	3570230	330	Distal Intergenic	-5120	203.999	3.64872
	chr2L	3572623	3572952	330	Promoter (2-3kb)	-2398	159.595	2.93165
	chr2L	3573426	3573689	264	Promoter (1-2kb)	-1661	604.533	4.10745
	chr2L	3573982	3574274	293	Promoter (1-2kb)	-1076	1342.58	4.10745
	chr2L	3576198	3576346	149	Promoter (<=1kb)	0	149.717	2.52525
	chr2L	3576617	3576771	155	Promoter (<=1kb)	407	237.36	4.10745
	chr2L	3577520	3577849	330	Promoter (1-2kb)	1310	256.483	4.10745
[truncated: 6,966 more rows]

## Sheet: Source Data Figure 7D
	Source Data Figure 7D
	Position frequency matrix
	P0	A	C	G	T
	1	1545	1026	1020	1260
	2	1375	1032	1047	1397
	3	2101	732	895	1123
	4	1728	808	1193	1122
	5	1289	2010	496	1056
	6	483	332	113	3923
	7	4442	87	125	197
	8	114	99	93	4545
	9	168	4482	67	134
	10	133	67	4483	168
	11	4546	93	98	114
	12	198	124	87	4442
	13	3922	113	333	483
	14	1055	494	2011	1291
	15	1123	1193	810	1725
	16	1122	895	731	2103
	17	1396	1048	1031	1376
	18	1261	1022	1024	1544

## Sheet: Source Data Figure 7F
	Source Data Figure 7F
	CG1603 peaks log10(signalValue) vs CG1603PBac log2FoldChange
	ID	log10(signalValue)	log2FoldChange	group
	FBgn0031213	2.56022	1.80401	Others
	FBgn0031216	2.31655	0.462227	Others
	FBgn0005278	2.36473	0.794661	Others
	FBgn0031228	2.62836	-1.74827	Mito-EBR
	FBgn0001142	2.14733	-0.270532	Mito-Others
	FBgn0031227	2.22934	-1.1338	Others
	FBgn0031229	2.61793	-0.673838	Others
	FBgn0016977	2.60535	1.04328	Others
	FBgn0266557	2.32129	0.353858	Others
	FBgn0266557	2.75304	0.353858	Others
	FBgn0283652	2.15132	-0.65458	Others
	FBgn0031239	2.8581	1.67258	Others
	FBgn0031238	2.57006	-0.420784	Others
	FBgn0086855	2.87452	-0.406548	Others
	FBgn0031244	2.59065	0.393738	Others
	FBgn0031245	2.67742	-0.282506	Others
	FBgn0031245	2.54699	-0.282506	Others
	FBgn0031247	2.44792	-1.3023	Mito-EBR
	FBgn0017457	2.30601	-0.877108	Others
	FBgn0024352	2.4777	-1.1388	Others
	FBgn0020622	2.88137	0.289207	Others
	FBgn0004611	2.84032	0.867201	Others
	FBgn0031250	2.68182	0.794101	Others
	FBgn0263933	2.97944	-0.21154	Others
	FBgn0002593	2.67687	-0.548809	Others
	FBgn0027592	2.41122	-0.449336	Others
	FBgn0043364	3.41465	0.443412	Others
	FBgn0010602	2.37603	-0.783982	Others
	FBgn0031260	2.72601	-1.38204	Others
	FBgn0260933	2.2697	2.07873	Others
	FBgn0031265	2.68524	-0.191077	Others
	FBgn0021874	2.81342	-0.341924	Others
	FBgn0031268	2.4817	0.255477	Others
	FBgn0015621	2.46947	-0.525021	Others
	FBgn0031285	2.82264	1.16866	Others
	FBgn0020304	2.84495	1.2463	Others
	FBgn0020304	2.90627	1.2463	Others
	FBgn0020545	2.82107	1.19333	Mito-Others
	FBgn0031289	2.26187	1.08474	Others
	FBgn0029095	3.34626	0.496047	Others
	FBgn0029095	3.10592	0.496047	Others
	FBgn0029095	2.32659	0.496047	Others
	FBgn0020305	2.36219	-1.16279	Others
	FBgn0053526	2.76107	1.13959	Others
	FBgn0053526	2.53695	1.13959	Others
	FBgn0003310	2.89985	0.8604	Others
	FBgn0016926	2.84495	0.863099	Others
	FBgn0261458	2.30788	-0.564968	Others
	FBgn0261458	2.39567	-0.564968	Others
	FBgn0031322	2.86794	-0.641034	Others
	FBgn0053126	2.36952	1.53375	Others
	FBgn0002543	2.52837	1.14765	Others
	FBgn0021906	2.93489	-1.0644	Mito-EBR
	FBgn0086758	2.58171	1.45437	Others
	FBgn0011570	2.27817	-0.570806	Others
	FBgn0031356	2.90004	-0.221677	Others
	FBgn0031359	2.63667	0.937493	Mito-EBR
	FBgn0000579	2.45282	-0.964631	Mito-Others
	FBgn0260648	2.35639	-1.05546	Others
	FBgn0000579	2.42158	-0.964631	Mito-Others
	FBgn0031374	2.83405	1.3549	Others
	FBgn0031374	2.35383	1.3549	Others
	FBgn0267972	2.60596	-0.760231	Others
	FBgn0031379	2.30567	-0.567363	Others
	FBgn0001125	2.22799	-1.45453	Mito-Others
	FBgn0001125	2.29786	-1.45453	Mito-Others
	FBgn0031384	2.47822	1.1619	Others
	FBgn0003557	3.1347	0.440581	Others
	FBgn0004507	2.52411	-1.35964	Others
	FBgn0004507	2.3794	-1.35964	Others
	FBgn0031390	3.14463	-0.44312	Others
	FBgn0031390	2.37065	-0.44312	Others
	FBgn0027509	2.88807	-0.308826	Others
	FBgn0000097	2.30153	0.206726	Others
	FBgn0000097	2.7597	0.206726	Others
	FBgn0010288	2.37613	-0.405266	Others
	FBgn0031399	2.41488	0.389159	Others
	FBgn0031401	2.36621	-0.264278	Others
	FBgn0031401	3.20741	-0.264278	Others
	FBgn0014010	2.67845	0.352283	Others
	FBgn0014010	2.4605	0.352283	Others
	FBgn0031418	2.91539	-0.729822	Others
	FBgn0264672	3.34687	-0.820981	Others
	FBgn0031422	2.5431	-1.08869	Others
	FBgn0031428	2.39342	-0.704138	Mito-Others
	FBgn0011818	3.02635	1.12217	Others
	FBgn0031436	2.56186	-1.46783	Mito-EBR
	FBgn0026479	2.969	-1.11061	Mito-Others
	FBgn0031449	2.18487	-0.221429	Others
	FBgn0031449	2.30992	-0.221429	Others
	FBgn0031450	2.76447	0.719089	Others
	FBgn0250906	2.87783	-1.01759	Others
	FBgn0250906	2.20277	-1.01759	Others
	FBgn0250906	2.33866	-1.01759	Others
	FBgn0250906	2.73545	-1.01759	Others
	FBgn0250906	2.32071	-1.01759	Others
	FBgn0250906	2.58168	-1.01759	Others
	FBgn0026324	2.59089	-0.784725	Others
	FBgn0019830	2.64069	-1.09812	Mito-Others
	FBgn0283531	2.29355	0.497593	Others
	FBgn0031473	2.4535	0.706831	Others
	FBgn0015521	2.73405	-0.991919	Others
	FBgn0031474	2.73164	0.596679	Others
	FBgn0051694	2.42183	0.260487	Others
	FBgn0051950	2.6566	-1.904	Others
	FBgn0024947	2.49135	1.4763	Others
	FBgn0024947	2.96469	1.4763	Others
	FBgn0024947	2.54782	1.4763	Others
	FBgn0010263	2.43137	0.367628	Others
	FBgn0024920	2.52728	-2.80619	Mito-Others
	FBgn0004584	2.36453	-1.23374	Others
	FBgn0031485	4.41451	-2.89672	Others
	FBgn0031485	2.62837	-2.89672	Others
	FBgn0031495	2.3318	-0.463155	Others
	FBgn0031497	2.81706	-0.227445	Mito-EBR
	FBgn0031500	2.70902	-0.888489	Mito-Others
	FBgn0031501	2.49357	-1.80811	Others
	FBgn0015600	2.23707	0.708375	Others
	FBgn0015600	2.71527	0.708375	Others
	FBgn0031505	2.30763	-1.60792	Mito-EBR
	FBgn0011648	3.47011	0.311996	Others
	FBgn0011648	2.21298	0.311996	Others
	FBgn0264744	2.36698	1.1318	Others
	FBgn0020445	2.93235	-1.20618	Others
	FBgn0085423	2.37255	1.08193	Others
	FBgn0085423	2.78583	1.08193	Others
	FBgn0031540	2.88892	-1.4134	Others
	FBgn0261560	2.40692	1.09971	Others
	FBgn0015663	2.14976	-0.713497	Others
	FBgn0031564	2.49411	1.34439	Others
	FBgn0015376	2.32597	-2.058	Others
	FBgn0051955	2.49518	3.53117	Others
	FBgn0004893	3.21856	0.255988	Others
	FBgn0021800	2.27	0.804585	Others
	FBgn0021800	3.52489	0.804585	Others
	FBgn0031574	2.55525	-2.89939	Others
	FBgn0031575	2.52741	0.60848	Others
	FBgn0051957	2.90965	-1.32864	Others
	FBgn0000547	3.10609	0.634343	Others
	FBgn0000547	2.20019	0.634343	Others
	FBgn0051961	2.50537	0.462599	Others
	FBgn0031590	2.51075	-0.910914	Others
	FBgn0003941	2.2727	-0.407202	Others
	FBgn0010473	2.85274	1.22642	Others
	FBgn0020762	2.76847	0.868001	Others
	FBgn0020762	2.71747	0.868001	Others
	FBgn0261976	2.61011	-0.884219	Others
	FBgn0031602	2.31661	1.06884	Others
	FBgn0025684	2.99121	-1.12503	Others
	FBgn0285948	2.91832	-0.365462	Others
	FBgn0285948	2.60547	-0.365462	Others
	FBgn0031608	2.38656	-0.631954	Others
	FBgn0031632	2.62254	1.40497	Others
	FBgn0031635	3.725	0.803863	Others
	FBgn0031640	2.66299	-0.30366	Others
	FBgn0031646	2.35279	2.20132	Others
	FBgn0053113	3.62434	-1.0634	Others
	FBgn0053113	2.73652	-1.0634	Others
	FBgn0053113	2.42213	-1.0634	Others
	FBgn0053113	2.86456	-1.0634	Others
	FBgn0053113	2.32593	-1.0634	Others
	FBgn0053113	2.83229	-1.0634	Others
	FBgn0053113	2.93866	-1.0634	Others
	FBgn0031673	2.93309	-0.58507	Others
	FBgn0031673	2.3074	-0.58507	Others
	FBgn0022023	2.75864	-0.235824	Others
	FBgn0022023	2.70822	-0.235824	Others
	FBgn0014857	4.13156	-0.762118	Others
	FBgn0028694	2.46454	-0.728828	Others
	FBgn0028572	2.52122	0.446427	Others
	FBgn0261608	2.75784	-0.645314	Others
	FBgn0031681	2.19142	-1.09794	Others
	FBgn0031683	2.51125	0.597282	Others
	FBgn0031684	2.40745	-1.15452	Mito-EBR
	FBgn0261836	2.6608	0.520238	Others
	FBgn0000228	2.48226	0.806571	Others
	FBgn0031698	2.55461	0.693536	Others
	FBgn0031702	2.54839	-0.644528	Others
	FBgn0031703	2.44188	-0.439808	Mito-Others
	FBgn0031711	2.55877	-0.598663	Others
	FBgn0002525	2.60763	-0.592328	Others
	FBgn0031736	2.64781	-0.592577	Others
	FBgn0031736	2.49434	-0.592577	Others
	FBgn0031745	2.36559	0.924499	Others
	FBgn0043362	2.61128	1.10439	Others
	FBgn0000308	2.71769	-0.760345	Others
	FBgn0001942	2.63238	0.898734	Others
	FBgn0001942	2.53883	0.898734	Others
	FBgn0001941	3.00953	-0.116678	Others
	FBgn0031759	2.83638	0.853078	Others
	FBgn0001170	2.54521	1.15361	Others
	FBgn0031764	2.69341	-0.620575	Others
	FBgn0000052	2.5536	-0.262129	Others
	FBgn0029161	2.63565	-1.2128	Mito-Others
	FBgn0029161	2.21987	-1.2128	Mito-Others
	FBgn0031769	2.63285	-0.710809	Others
	FBgn0031769	3.3307	-0.710809	Others
	FBgn0031771	2.89223	-0.631865	Mito-EBR
	FBgn0031773	3.74403	-0.406575	Others
	FBgn0031776	2.37118	-1.15938	Others
	FBgn0266449	2.53562	-0.464456	Others
	FBgn0031779	2.97071	-0.730519	Others
	FBgn0284255	2.79424	-0.466268	Others
	FBgn0031782	2.58355	0.750248	Others
	FBgn0085409	2.33928	1.61845	Others
	FBgn0015623	2.50581	0.860171	Others
	FBgn0015623	2.24607	0.860171	Others
	FBgn0031801	2.42107	-1.52603	Others
	FBgn0031817	2.8757	-1.02402	Mito-Others
	FBgn0259749	2.60182	0.313349	Others
	FBgn0031818	2.49105	-0.504196	Others
	FBgn0086357	2.30609	-2.11203	Others
	FBgn0086357	2.19109	-2.11203	Others
	FBgn0031820	2.52166	0.5776	Others
	FBgn0031822	2.43846	-1.22614	Others
	FBgn0031832	2.63857	-1.22997	Others
	FBgn0031832	3.36205	-1.22997	Others
	FBgn0031835	2.78157	1.91654	Others
	FBgn0031836	3.09082	0.32214	Mito-Others
	FBgn0031836	3.91268	0.32214	Mito-Others
	FBgn0051635	3.42331	1.11354	Others
	FBgn0051635	2.83407	1.11354	Others
	FBgn0085339	2.65687	-1.57129	Others
	FBgn0028703	2.63213	1.20098	Others
	FBgn0028703	2.20862	1.20098	Others
	FBgn0031851	2.61361	0.523279	Others
	FBgn0025777	2.19466	-0.284826	Others
	FBgn0015776	2.78447	-0.234073	Others
	FBgn0015776	2.74528	-0.234073	Others
	FBgn0086451	2.81282	-0.543181	Others
	FBgn0026196	2.47438	-0.918433	Others
	FBgn0026196	2.19155	-0.918433	Others
	FBgn0004838	2.82283	-0.454335	Others
	FBgn0031872	2.46316	-0.410799	Others
	FBgn0020616	2.42711	-0.316113	Others
	FBgn0264922	2.63412	-1.26408	Others
	FBgn0264922	2.66961	-1.26408	Others
	FBgn0051908	2.42078	-0.304394	Others
	FBgn0031882	2.96282	0.643178	Others
	FBgn0262872	2.62446	0.226631	Others
	FBgn0262872	2.97254	0.226631	Others
	FBgn0262872	2.43926	0.226631	Others
	FBgn0262872	2.19186	0.226631	Others
	FBgn0031885	2.95375	1.67119	Others
	FBgn0266666	2.2973	-1.42736	Others
	FBgn0031886	2.78357	-1.50449	Others
	FBgn0031896	2.82225	0.461982	Others
	FBgn0031897	2.15069	-0.216916	Others
	FBgn0031897	2.83083	-0.216916	Others
	FBgn0284084	2.1891	0.447898	Others
	FBgn0283658	2.68364	-1.72455	Mito-Others
	FBgn0031913	2.47685	-1.74186	Others
	FBgn0031914	2.64827	0.889896	Others
	FBgn0260486	2.92059	1.24412	Others
	FBgn0031947	2.79765	-0.396872	Others
	FBgn0031950	2.97178	0.339275	Others
	FBgn0031952	2.38964	0.444378	Others
	FBgn0261800	2.37833	-1.50901	Others
	FBgn0261800	2.36761	-1.50901	Others
	FBgn0020618	2.82071	-0.138785	Others
	FBgn0004177	2.8512	-0.181506	Others
	FBgn0004177	2.24777	-0.181506	Others
	FBgn0083968	2.46491	-1.6684	Mito-EBR
	FBgn0083968	2.2592	-1.6684	Mito-EBR
	FBgn0085450	2.48959	0.958468	Others
	FBgn0031969	2.52559	1.34251	Others
	FBgn0031969	2.45283	1.34251	Others
	FBgn0031971	2.57586	2.44316	Mito-Others
	FBgn0044323	2.19945	0.393607	Others
	FBgn0044323	2.14732	0.393607	Others
	FBgn0031980	2.82981	-0.471416	Others
	FBgn0261822	2.20951	-0.206294	Others
	FBgn0261822	2.22628	-0.206294	Others
	FBgn0261822	2.32739	-0.206294	Others
	FBgn0031990	2.72716	-0.205663	Others
	FBgn0031990	3.15632	-0.205663	Others
	FBgn0015299	2.53592	-0.965994	Others
	FBgn0032006	2.22362	0.249095	Others
	FBgn0003502	2.7842	0.617715	Others
	FBgn0003502	2.38348	0.617715	Others
	FBgn0261020	2.34287	-1.06214	Others
	FBgn0032015	2.18723	-2.16686	Others
	FBgn0010265	2.60037	-0.684917	Others
	FBgn0032030	2.4366	-0.540488	Others
	FBgn0032031	3.17232	-0.714282	Mito-Others
	FBgn0027094	2.32633	-0.533015	Mito-EBR
	FBgn0032033	2.89105	-1.54651	Mito-Others
	FBgn0263852	2.35869	-1.78325	Others
	FBgn0032036	2.17872	0.556712	Others
	FBgn0020497	2.87787	-0.594579	Others
	FBgn0026718	2.75116	-1.18218	Others
	FBgn0262029	2.74478	-1.04856	Others
	FBgn0032050	3.07258	-1.33082	Others
	FBgn0032051	2.26051	-0.462301	Others
	FBgn0032054	2.72485	-0.603773	Others
	FBgn0028394	3.11048	1.0221	Others
	FBgn0028394	2.56365	1.0221	Others
	FBgn0011259	2.60883	1.4455	Others
	FBgn0011259	2.53032	1.4455	Others
	FBgn0003209	2.2889	1.07717	Others
	FBgn0032075	2.37912	0.923224	Others
	FBgn0032075	2.24748	0.923224	Others
	FBgn0032077	2.69786	-0.461635	Mito-Others
	FBgn0032078	2.18139	0.531129	Others
	FBgn0032079	2.90803	-0.962237	Others
	FBgn0032084	2.8231	1.1169	Others
	FBgn0013746	2.96431	-0.742986	Others
	FBgn0052982	2.59644	1.26528	Others
	FBgn0032101	2.51321	-1.19706	Others
	FBgn0041092	2.19675	0.867841	Others
	FBgn0010314	2.96318	-1.28691	Others
	FBgn0012036	2.61137	-1.71631	Mito-Others
	FBgn0011232	2.5236	-0.435886	Others
	FBgn0002973	2.25859	0.574029	Others
	FBgn0002973	2.18794	0.574029	Others
	FBgn0002973	2.82187	0.574029	Others
	FBgn0004868	2.62262	-0.609224	Others
	FBgn0032123	3.20346	0.388958	Others
	FBgn0032129	3.09032	-0.324127	Others
	FBgn0032130	2.36588	0.699435	Others
	FBgn0032130	2.38101	0.699435	Others
	FBgn0040070	2.34901	-0.403929	Others
	FBgn0032135	2.91269	0.615256	Others
	FBgn0032136	2.73166	-0.65532	Others
	FBgn0000273	2.7508	-0.400797	Others
	FBgn0286786	2.55817	-2.17989	Others
	FBgn0032138	2.20836	0.959856	Others
	FBgn0032149	2.69859	-0.392732	Others
	FBgn0004867	2.98656	-0.582848	Others
	FBgn0032157	2.19351	-0.409112	Others
	FBgn0024285	2.14728	-0.247197	Others
	FBgn0040064	2.51755	-0.251363	Mito-Others
	FBgn0025700	2.78028	-2.25484	Others
	FBgn0032162	2.64428	-1.03348	Mito-Others
	FBgn0032166	2.73066	-1.54059	Mito-EBR
	FBgn0032168	2.20336	-0.918964	Mito-Others
	FBgn0032170	2.68976	1.0477	Others
	FBgn0011272	2.9806	-0.478617	Others
	FBgn0051875	2.62673	1.22302	Others
	FBgn0043456	2.87009	-0.995344	Others
	FBgn0011584	2.45611	-0.651918	Others
	FBgn0011584	3.35338	-0.651918	Others
	FBgn0027600	2.18955	-0.362503	Others
	FBgn0005593	3.49657	-0.258472	Others
	FBgn0024320	3.98731	0.394716	Others
	FBgn0032196	2.89267	0.396859	Others
	FBgn0032196	2.60069	0.396859	Others
	FBgn0032198	3.53478	-2.05061	Others
	FBgn0051720	2.60822	0.845852	Others
	FBgn0004419	3.83812	-1.18759	Others
	FBgn0004419	2.296	-1.18759	Others
	FBgn0024248	2.85289	0.639388	Others
	FBgn0032200	3.9018	-2.77084	Mito-Others
	FBgn0011305	3.86417	-1.24322	Others
	FBgn0032202	3.56485	1.70172	Others
	FBgn0032204	2.16546	0.337344	Others
	FBgn0260750	3.15819	-1.18275	Mito-Others
	FBgn0260749	2.62888	0.522344	Others
	FBgn0260749	2.9753	0.522344	Others
	FBgn0005322	2.60383	-0.506951	Mito-Others
	FBgn0032214	2.69237	-0.743842	Others
	FBgn0027491	2.35465	1.16123	Others
	FBgn0267365	3.84556	-1.31067	Others
	FBgn0032216	3.0844	-1.01531	Others
	FBgn0032216	3.73471	-1.01531	Others
	FBgn0032218	2.15697	-0.246377	Others
	FBgn0011703	3.12495	-2.17118	Others
	FBgn0032222	2.20716	-0.907599	Mito-Others
	FBgn0032223	3.08335	1.05129	Others
	FBgn0032223	2.73431	1.05129	Others
	FBgn0019932	2.79117	-0.367907	Others
	FBgn0051715	2.36783	-0.906992	Others
	FBgn0032224	2.36787	0.443611	Others
	FBgn0032225	2.17918	0.829687	Others
	FBgn0032231	4.24215	0.787493	Others
	FBgn0053303	2.24355	-1.4119	Others
	FBgn0032235	2.86659	0.629826	Others
	FBgn0004106	3.12824	-1.04349	Others
	FBgn0004106	3.42451	-1.04349	Others
	FBgn0267821	3.24514	0.302639	Others
	FBgn0003942	2.27317	-0.59851	Others
	FBgn0003942	4.09619	-0.59851	Others
	FBgn0032244	3.63372	-1.96865	Others
	FBgn0267330	2.2435	-1.15303	Others
	FBgn0032247	2.3269	-1.08515	Mito-Others
	FBgn0032248	3.5278	-0.416551	Others
	FBgn0027052	2.93478	0.280572	Others
	FBgn0051719	3.3222	0.413036	Others
	FBgn0032264	2.84255	1.58503	Others
	FBgn0051871	2.41483	0.415118	Others
	FBgn0032287	2.8629	-1.9289	Mito-Others
	FBgn0032290	2.31597	0.375335	Others
	FBgn0032292	2.79912	-1.06163	Others
	FBgn0027868	2.82598	-1.50735	Others
	FBgn0032295	3.09834	1.29235	Others
	FBgn0004363	2.86986	-1.38869	Mito-Others
	FBgn0027453	2.42142	0.33545	Others
	FBgn0261871	2.50726	1.74586	Others
	FBgn0053129	2.23951	-2.17504	Others
	FBgn0053129	2.37182	-2.17504	Others
	FBgn0015756	2.74139	-0.674121	Others
	FBgn0032329	2.3374	-1.28179	Others
	FBgn0262647	2.73171	-1.08491	Others
	FBgn0032354	2.30965	-0.584127	Others
	FBgn0040232	2.95477	-2.52253	Others
	FBgn0020270	2.24992	2.18594	Others
	FBgn0261648	2.22812	0.778202	Others
	FBgn0032363	2.81361	0.381307	Others
	FBgn0020309	2.21845	0.681195	Others
	FBgn0020309	2.56094	0.681195	Others
	FBgn0032378	2.33351	-0.273229	Others
	FBgn0000588	2.91693	-1.13175	Others
	FBgn0032388	2.33437	0.693032	Others
	FBgn0032394	2.39477	-0.489701	Others
	FBgn0014019	2.62288	1.6792	Others
	FBgn0010497	2.72958	-0.701918	Others
	FBgn0032399	2.85048	-0.497566	Others
	FBgn0032399	2.17689	-0.497566	Others
	FBgn0032407	2.7279	-0.860843	Others
	FBgn0032421	2.64668	-0.405055	Others
	FBgn0032428	2.67993	2.13942	Others
	FBgn0032430	2.27538	-0.794012	Others
	FBgn0265298	2.58276	-0.876113	Others
	FBgn0265298	2.38112	-0.876113	Others
	FBgn0259176	2.3103	0.949903	Others
	FBgn0259176	3.03566	0.949903	Others
	FBgn0259176	2.7421	0.949903	Others
	FBgn0032445	2.65811	-0.522765	Others
	FBgn0032450	2.91976	-0.850221	Others
	FBgn0032454	2.59496	-0.966337	Others
	FBgn0032455	2.31893	0.47576	Others
	FBgn0032456	2.73001	0.422842	Others
	FBgn0263598	2.73444	-0.951977	Others
	FBgn0032487	2.44146	-1.0504	Others
	FBgn0051855	2.65897	-0.546537	Others
	FBgn0032511	2.45685	-1.38664	Mito-EBR
	FBgn0032513	2.64534	-1.28799	Mito-Others
	FBgn0032518	2.87674	-0.548472	Others
	FBgn0032521	2.82117	2.19663	Others
	FBgn0263354	2.48371	1.77828	Others
	FBgn0032524	2.87156	-0.843975	Others
	FBgn0023407	2.56152	1.1333	Others
	FBgn0259984	2.62659	0.637595	Others
	FBgn0024846	2.40588	-0.159292	Others
	FBgn0028509	3.85343	1.3203	Others
	FBgn0019890	3.84145	0.928948	Others
	FBgn0016930	2.41672	0.443612	Others
	FBgn0028530	2.70347	-0.471307	Mito-EBR
	FBgn0015791	2.72293	0.602781	Others
	FBgn0015791	2.71135	0.602781	Others
	FBgn0003016	3.14647	0.578504	Others
	FBgn0000317	2.84368	-1.25787	Others
	FBgn0010422	2.92696	-0.573531	Others
	FBgn0024183	3.01877	-1.28553	Others
	FBgn0001978	2.99209	0.250972	Others
	FBgn0028862	2.29148	1.64617	Others
	FBgn0028862	2.36087	1.64617	Others
	FBgn0261268	2.30318	-0.770812	Others
	FBgn0010382	2.18261	-1.87818	Others
	FBgn0010382	2.53151	-1.87818	Others
	FBgn0001989	2.7009	-1.36739	Mito-EBR
	FBgn0041627	2.49182	1.17662	Others
	FBgn0024734	2.6846	0.122957	Others
	FBgn0001994	2.95899	0.598561	Others
	FBgn0000250	2.48173	-0.481118	Others
	FBgn0000250	2.20007	-0.481118	Others
	FBgn0014092	2.41897	-1.07146	Mito-Others
	FBgn0001995	2.76205	-1.0493	Mito-EBR
	FBgn0020414	2.25787	0.149114	Others
	FBgn0005677	2.42359	1.45104	Others
	FBgn0032586	2.92727	-0.306839	Others
	FBgn0032587	3.10286	1.61183	Others
	FBgn0261278	2.62381	-0.874583	Others
	FBgn0267347	2.35311	-1.09552	Others
	FBgn0062978	3.29098	1.45547	Others
	FBgn0284248	2.53332	-1.46248	Mito-EBR
	FBgn0284248	2.67208	-1.46248	Mito-EBR
	FBgn0284248	2.16561	-1.46248	Mito-EBR
	FBgn0027779	2.47035	-0.44959	Others
	FBgn0004797	2.70158	-0.312014	Others
	FBgn0004797	2.40594	-0.312014	Others
	FBgn0040985	2.45071	1.72788	Mito-Others
	FBgn0032629	2.52875	1.60321	Others
	FBgn0032633	2.60441	0.540217	Others
	FBgn0020503	2.51614	0.708097	Others
	FBgn0000183	2.36758	-0.53701	Others
	FBgn0024689	2.83654	-0.286383	Others
	FBgn0032643	3.27058	-1.40243	Others
	FBgn0003187	2.17817	-1.03441	Others
	FBgn0032646	2.5726	-1.48868	Mito-EBR
	FBgn0001301	2.75104	1.81863	Others
	FBgn0041184	2.56756	2.19974	Others
	FBgn0041184	3.12408	2.19974	Others
	FBgn0032671	2.25749	-0.571743	Others
	FBgn0000636	2.36303	-0.682066	Others
	FBgn0261597	2.43825	-0.517249	Others
	FBgn0086707	3.05871	-0.476252	Others
	FBgn0032689	3.23348	0.259864	Others
	FBgn0032691	2.49014	-0.806494	Others
	FBgn0032693	2.76367	-2.45068	Others
	FBgn0015553	2.51322	-1.49472	Others
	FBgn0005617	2.73749	-0.372302	Others
	FBgn0032698	2.24885	-2.46443	Others
	FBgn0032699	3.05907	1.76984	Others
	FBgn0032701	2.19149	-0.705455	Others
	FBgn0032703	2.34311	-1.07148	Others
	FBgn0032704	3.14831	-0.48717	Others
	FBgn0025608	2.20402	0.349495	Others
	FBgn0025608	2.93195	0.349495	Others
	FBgn0032713	2.39046	-0.213662	Others
	FBgn0032715	2.44572	-1.17783	Mito-Others
	FBgn0015808	2.3489	-0.420618	Mito-Others
	FBgn0032717	3.03585	0.554168	Others
	FBgn0032721	2.99534	-1.60936	Others
	FBgn0032720	2.82468	-1.52224	Mito-EBR
	FBgn0032725	2.66532	-1.3867	Others
	FBgn0086710	3.30737	-0.669771	Others
	FBgn0032741	2.36794	0.606273	Others
	FBgn0002022	2.18442	-0.771645	Others
	FBgn0032744	2.90071	0.330543	Mito-Others
	FBgn0032746	2.26874	-1.51162	Others
	FBgn0261396	2.76339	-0.868791	Others
	FBgn0002036	2.48867	-0.624738	Others
	FBgn0086447	2.54519	-1.68668	Others
	FBgn0086447	2.36038	-1.68668	Others
	FBgn0010300	2.38584	0.774134	Others
	FBgn0010300	3.10897	0.774134	Others
	FBgn0032763	2.64711	0.504255	Others
	FBgn0010309	2.497	0.425738	Others
	FBgn0015380	2.47111	0.977756	Others
	FBgn0032775	2.22214	-0.730621	Others
	FBgn0032775	2.22382	-0.730621	Others
	FBgn0041789	3.0308	-1.3013	Others
	FBgn0032779	2.84918	-0.635553	Others
	FBgn0032780	2.17812	-1.18007	Others
	FBgn0032779	2.56327	-0.635553	Others
	FBgn0041789	2.65239	-1.3013	Others
	FBgn0032781	2.65209	-0.656014	Others
	FBgn0032783	2.15251	0.648824	Others
	FBgn0032783	3.04057	0.648824	Others
	FBgn0003346	3.1816	-1.75214	Others
	FBgn0284220	3.08912	-1.49096	Others
	FBgn0032797	2.38333	0.745956	Others
	FBgn0032800	2.36249	0.670734	Others
	FBgn0032801	2.89437	-0.565184	Others
	FBgn0032801	2.24395	-0.565184	Others
	FBgn0053116	2.79875	-0.437679	Others
	FBgn0003231	2.67567	1.9271	Others
	FBgn0032805	2.35177	1.20203	Others
	FBgn0032805	2.16442	1.20203	Others
	FBgn0005672	2.20014	0.751518	Others
	FBgn0005672	2.59591	0.751518	Others
	FBgn0005672	3.0818	0.751518	Others
	FBgn0000464	2.58102	1.12647	Others
	FBgn0032818	3.22233	-0.724798	Mito-Others
	FBgn0032821	2.21445	0.432074	Others
	FBgn0263873	3.28055	1.0035	Others
	FBgn0263873	2.44843	1.0035	Others
	FBgn0263873	2.22259	1.0035	Others
	FBgn0263873	2.40891	1.0035	Others
	FBgn0014127	2.25313	-0.562493	Others
	FBgn0045064	2.57438	1.43351	Others
	FBgn0263773	2.84777	1.29014	Others
	FBgn0263773	2.19931	1.29014	Others
	FBgn0032845	2.89387	0.972471	Others
	FBgn0032847	2.33228	-0.4167	Others
	FBgn0032849	2.34122	-1.51484	Mito-EBR
	FBgn0032850	2.38845	0.958488	Others
	FBgn0011638	2.98976	-0.633796	Others
	FBgn0032857	2.64881	1.02091	Others
	FBgn0032864	2.25418	-0.723814	Others
	FBgn0016054	2.77206	-2.34207	Mito-Others
	FBgn0259936	2.42256	0.897293	Others
	FBgn0032871	2.6333	-0.684593	Others
	FBgn0086657	2.61578	-0.264589	Others
	FBgn0014859	2.16792	1.6087	Others
	FBgn0262743	2.18665	0.193997	Others
	FBgn0011202	2.23116	1.08509	Others
	FBgn0011202	2.3613	1.08509	Others
	FBgn0000251	2.30943	0.817201	Others
	FBgn0032884	2.91194	-1.34432	Others
	FBgn0032901	2.64357	0.865425	Others
	FBgn0032901	2.56392	0.865425	Others
	FBgn0032901	2.58855	0.865425	Others
	FBgn0266369	2.7711	-2.36545	Others
	FBgn0032907	2.48731	1.58747	Mito-Others
	FBgn0032908	2.28005	1.6018	Others
	FBgn0250867	2.21893	2.1847	Others
	FBgn0250867	2.62084	2.1847	Others
	FBgn0040297	2.37322	0.721547	Others
	FBgn0032919	3.13002	-0.509147	Others
	FBgn0086251	2.60767	1.38908	Others
	FBgn0024371	2.57385	-0.519297	Others
	FBgn0024371	2.20349	-0.519297	Others
	FBgn0032922	2.73658	-0.983344	Mito-Others
	FBgn0032925	2.49532	-1.02047	Others
	FBgn0032934	2.86146	1.08187	Others
	FBgn0032935	2.30674	1.8496	Others
	FBgn0026577	2.78483	0.366991	Others
	FBgn0051626	2.26043	-0.580994	Others
	FBgn0051626	4.31592	-0.580994	Others
	FBgn0021856	2.53937	-0.998512	Mito-Others
	FBgn0032938	2.60151	0.511056	Others
	FBgn0032940	2.68955	-0.447413	Others
	FBgn0000370	2.78781	0.331018	Others
	FBgn0023091	2.20235	1.37074	Others
	FBgn0032943	3.29593	0.949292	Others
	FBgn0032945	2.52864	1.2472	Mito-Others
	FBgn0032949	2.73336	0.322084	Others
	FBgn0032955	2.20195	0.481981	Others
	FBgn0032955	2.68698	0.481981	Others
	FBgn0022893	2.28238	-0.791611	Others
	FBgn0022893	2.58628	-0.791611	Others
	FBgn0032956	2.69245	0.184188	Others
	FBgn0032957	2.27771	1.26248	Others
	FBgn0000559	2.79095	-0.537634	Others
	FBgn0086779	2.92101	0.983439	Others
	FBgn0032961	2.36292	-0.925707	Others
	FBgn0051612	3.31299	1.07946	Others
	FBgn0025674	3.05062	-0.202904	Others
	FBgn0261802	2.89915	0.821979	Others
	FBgn0032986	3.4078	0.347698	Mito-Others
	FBgn0032987	3.18736	-0.288763	Others
	FBgn0032988	2.81644	-0.379222	Others
	FBgn0064225	4.11344	0.264841	Others
	FBgn0040010	3.12951	0.522084	Others
	FBgn0040011	2.83358	-0.709029	Others
	FBgn0040011	2.444	-0.709029	Others
	FBgn0040011	4.11513	-0.709029	Others
	FBgn0000384	2.45173	0.614205	Others
	FBgn0000384	3.68933	0.614205	Others
	FBgn0000384	2.19736	0.614205	Others
	FBgn0086683	3.35939	0.223164	Others
	FBgn0039958	2.99438	0.309619	Others
	FBgn0267976	3.98769	-1.82768	Mito-EBR
	FBgn0058191	3.83105	-2.65519	Others
	FBgn0058191	2.63857	-2.65519	Others
	FBgn0267398	3.59982	-0.238653	Others
	FBgn0267398	2.78307	-0.238653	Others
	FBgn0267861	2.84006	-0.528695	Others
	FBgn0267861	2.54442	-0.528695	Others
	FBgn0267861	3.99392	-0.528695	Others
	FBgn0039993	2.75884	-0.301426	Mito-Others
	FBgn0058263	2.35572	-5.94094	Others
	FBgn0058263	4.19667	-5.94094	Others
	FBgn0058263	2.56118	-5.94094	Others
	FBgn0085638	3.25217	0.441745	Others
	FBgn0085638	2.34945	0.441745	Others
	FBgn0046706	2.23806	0.48822	Others
	FBgn0046706	3.48842	0.48822	Others
	FBgn0262115	4.27006	-2.05178	Others
	FBgn0262116	4.10515	-1.56014	Others
	FBgn0262116	2.50307	-1.56014	Others
	FBgn0262117	2.99704	0.351837	Others
	FBgn0260798	3.57127	0.644971	Others
	FBgn0260798	3.5929	0.644971	Others
	FBgn0040007	2.21169	-0.802743	Others
	FBgn0040007	3.7531	-0.802743	Others
	FBgn0040007	2.72901	-0.802743	Others
	FBgn0046692	3.49976	0.763004	Others
	FBgn0046692	3.47112	0.763004	Others
	FBgn0260799	2.84033	0.360129	Others
	FBgn0260799	3.09636	0.360129	Others
	FBgn0032997	4.2679	-3.19293	Others
	FBgn0032997	2.82781	-3.19293	Others
	FBgn0040005	2.29806	-2.01644	Others
	FBgn0040005	4.22778	-2.01644	Others
	FBgn0040005	2.20012	-2.01644	Others
	FBgn0026401	3.17741	1.25888	Others
	FBgn0039994	2.19441	1.55516	Others
	FBgn0039994	3.27864	1.55516	Others
	FBgn0039994	2.20337	1.55516	Others
	FBgn0261387	2.44228	-1.32258	Others
	FBgn0261387	4.13884	-1.32258	Others
	FBgn0261387	2.7701	-1.32258	Others
	FBgn0033005	4.1863	-1.13057	Mito-Others
	FBgn0026238	3.28403	0.490125	Others
	FBgn0026238	3.54824	0.490125	Others
	FBgn0033010	3.15121	0.462487	Others
	FBgn0033010	2.26988	0.462487	Others
	FBgn0053554	3.92128	0.685196	Others
	FBgn0053554	2.65869	0.685196	Others
	FBgn0261403	3.69836	-0.206373	Others
	FBgn0033020	2.79332	6.25498	Mito-Others
	FBgn0033021	2.51967	-5.67008	Others
	FBgn0033021	3.9694	-5.67008	Others
	FBgn0050438	2.39135	-0.673804	Others
	FBgn0039969	3.40383	0.394733	Mito-Others
	FBgn0039970	2.40022	1.15587	Others
	FBgn0033029	2.93717	-0.301277	Others
	FBgn0033031	2.26754	0.619652	Others
	FBgn0033032	2.45263	0.181711	Others
	FBgn0033032	2.88228	0.181711	Others
	FBgn0259978	2.25076	-2.50456	Mito-Others
	FBgn0259978	4.22571	-2.50456	Mito-Others
	FBgn0022288	2.15997	-0.995839	Others
	FBgn0085229	2.60503	-1.20233	Others
	FBgn0000043	2.22698	-1.7035	Others
	FBgn0033052	2.75884	0.523996	Others
	FBgn0284246	2.73864	-0.788612	Others
	FBgn0033062	2.74162	-0.596158	Others
	FBgn0000546	2.21902	1.20739	Others
	FBgn0000546	2.16	1.20739	Others
	FBgn0000546	2.16707	1.20739	Others
	FBgn0086655	2.19989	0.985752	Others
	FBgn0086655	2.4903	0.985752	Others
	FBgn0262736	3.00846	-0.483771	Others
	FBgn0042085	2.17836	-0.530764	Others
	FBgn0033079	2.63768	-0.778944	Others
	FBgn0050443	2.17347	0.39101	Others
	FBgn0033081	2.58827	-0.939849	Others
	FBgn0033085	2.35717	-1.60162	Others
	FBgn0033086	2.30634	-0.223323	Mito-Others
	FBgn0033087	2.72008	0.45286	Others
	FBgn0033089	2.41886	-1.93453	Others
	FBgn0033093	2.34606	-1.90948	Mito-Others
	FBgn0014009	3.01039	0.492127	Others
	FBgn0028579	3.30583	-0.336265	Others
	FBgn0042083	2.4363	-0.509542	Mito-Others
	FBgn0027066	2.66208	-0.704206	Others
	FBgn0033100	2.84639	-1.54267	Mito-Others
	FBgn0014028	2.64039	-0.725845	Mito-EBR
	FBgn0265003	2.42904	0.908715	Others
	FBgn0033121	3.09493	0.337292	Others
	FBgn0050159	2.63391	-0.73009	Others
	FBgn0029507	2.15753	0.633313	Others
	FBgn0029506	3.03384	0.739268	Others
	FBgn0033127	2.31307	-0.19137	Others
	FBgn0033128	2.94715	-0.45756	Others
	FBgn0033134	3.10982	0.821698	Others
	FBgn0027558	2.73642	-0.538126	Others
	FBgn0033138	2.51665	-0.699356	Others
	FBgn0033139	2.58354	0.934421	Others
	FBgn0003090	2.25404	0.781188	Others
	FBgn0003090	2.70452	0.781188	Others
	FBgn0033153	2.34331	2.3459	Others
	FBgn0033166	2.89012	-0.495093	Others
	FBgn0033177	2.21386	1.33208	Others
	FBgn0033177	2.17646	1.33208	Others
	FBgn0033179	2.88886	-0.716042	Others
	FBgn0010548	2.46809	-0.718091	Mito-Others
	FBgn0010548	2.21199	-0.718091	Mito-Others
	FBgn0259745	2.64018	1.77854	Others
	FBgn0259745	2.33995	1.77854	Others
	FBgn0259745	2.40908	1.77854	Others
	FBgn0263240	2.33327	1.58977	Others
	FBgn0015929	3.0453	-1.85852	Others
	FBgn0033187	2.79461	-1.09695	Others
	FBgn0286788	2.68227	-3.32507	Others
	FBgn0033188	2.44723	1.25851	Others
	FBgn0033188	2.76896	1.25851	Others
	FBgn0033188	2.42317	1.25851	Others
	FBgn0033188	2.62503	1.25851	Others
	FBgn0033188	2.19481	1.25851	Others
	FBgn0264294	3.11647	0.472057	Mito-Others
	FBgn0033191	2.68705	-0.707225	Others
	FBgn0033205	3.11696	2.08241	Others
	FBgn0033208	2.43997	-1.84351	Mito-EBR
	FBgn0033210	2.64341	-1.36283	Others
	FBgn0042135	3.25014	1.54481	Others
	FBgn0033222	2.27157	1.50218	Others
	FBgn0033226	2.75572	1.95792	Mito-Others
	FBgn0033232	2.47514	0.537125	Others
	FBgn0033235	2.72265	-0.347313	Mito-EBR
	FBgn0050379	2.33053	-7.49756	Others
	FBgn0033241	2.66187	-0.887701	Others
	FBgn0033246	2.2517	-1.79441	Mito-Others
	FBgn0033246	2.29683	-1.79441	Mito-Others
	FBgn0033247	2.74733	-1.0659	Others
	FBgn0033250	3.27877	1.15951	Others
	FBgn0033252	2.17539	0.558324	Others
	FBgn0020279	2.57048	-1.13361	Others
	FBgn0025469	3.04243	-0.257409	Others
	FBgn0028563	2.2567	-0.611064	Others
	FBgn0033260	2.64132	-0.528939	Others
	FBgn0005648	2.78599	-0.649915	Others
	FBgn0263593	2.76834	0.316793	Others
	FBgn0021995	2.61547	-0.66049	Others
	FBgn0021995	2.82867	-0.66049	Others
	FBgn0013726	2.48306	-0.340376	Others
	FBgn0013726	2.73792	-0.340376	Others
	FBgn0050359	3.18231	0.542363	Others
	FBgn0033313	2.70324	0.269467	Others
	FBgn0033317	2.58302	-1.27193	Others
	FBgn0033317	2.51406	-1.27193	Others
	FBgn0263120	2.35505	-1.35122	Mito-Others
	FBgn0263120	2.6523	-1.35122	Mito-Others
	FBgn0263120	2.35233	-1.35122	Mito-Others
	FBgn0040777	2.48215	0.140091	Others
	FBgn0086784	2.85981	0.332911	Others
	FBgn0024189	2.25596	1.61983	Others
	FBgn0027513	2.71204	-1.53598	Others
	FBgn0004921	2.61152	0.616051	Others
	FBgn0284436	2.21529	-1.23707	Others
	FBgn0050349	2.65148	-0.987229	Others
	FBgn0003074	2.65474	-0.671611	Others
	FBgn0027607	2.81987	-0.148199	Others
	FBgn0033356	2.85495	0.913605	Others
	FBgn0033357	2.7062	-1.47241	Mito-EBR
	FBgn0265011	2.70383	-2.7998	Others
	FBgn0033368	2.34804	1.56184	Others
	FBgn0033378	2.58814	-1.519	Others
	FBgn0003612	2.49095	-0.438397	Others
	FBgn0260972	2.89172	0.869094	Others
	FBgn0050344	2.23041	-0.389499	Others
	FBgn0262515	2.49982	-0.587867	Others
	FBgn0033400	2.41688	-0.451627	Others
	FBgn0026326	2.45385	-0.93175	Others
	FBgn0016078	2.63326	0.8961	Others
	FBgn0016078	2.63676	0.8961	Others
	FBgn0033413	2.73606	-0.220018	Mito-Others
	FBgn0017558	2.67661	0.514889	Mito-Others
	FBgn0029092	2.62982	1.11761	Others
	FBgn0029092	2.41706	1.11761	Others
	FBgn0029092	2.30337	1.11761	Others
	FBgn0085436	2.64007	0.516825	Others
	FBgn0285949	2.95479	-0.336341	Others
	FBgn0033431	3.08956	0.577005	Others
	FBgn0033434	2.57575	0.977673	Others
	FBgn0050000	2.20319	0.367148	Others
	FBgn0033438	2.2043	0.992864	Others
	FBgn0023143	2.61556	-0.790509	Others
	FBgn0023143	2.77478	-0.790509	Others
	FBgn0033446	2.46938	1.14643	Others
	FBgn0050001	2.28671	1.26756	Others
	FBgn0033448	2.445	-0.764036	Others
	FBgn0033449	2.57977	-0.747349	Others
	FBgn0033457	2.51894	-0.389231	Others
	FBgn0286783	2.7502	-1.51886	Mito-EBR
	FBgn0033468	2.44318	-1.14014	Others
	FBgn0027619	2.64656	-0.490768	Others
	FBgn0033471	2.85156	-0.430776	Others
	FBgn0033476	2.66117	1.46712	Others
	FBgn0263260	2.5414	-1.36493	Others
	FBgn0262169	2.72636	0.679933	Others
	FBgn0262169	3.42575	0.679933	Others
	FBgn0033482	2.55282	-1.52415	Others
	FBgn0033483	2.24948	-0.941035	Others
	FBgn0001291	2.58656	0.943821	Others
	FBgn0004907	2.88474	-0.438742	Mito-Others
	FBgn0004907	2.46474	-0.438742	Mito-Others
	FBgn0004907	2.47395	-0.438742	Mito-Others
	FBgn0004907	2.23594	-0.438742	Mito-Others
	FBgn0033486	2.96976	0.487218	Others
	FBgn0265512	2.33814	2.23786	Others
	FBgn0265512	3.40757	2.23786	Others
	FBgn0033504	2.96703	0.146363	Others
	FBgn0033504	2.78638	0.146363	Others
	FBgn0033504	3.06241	0.146363	Others
	FBgn0033504	2.66419	0.146363	Others
	FBgn0028426	2.2975	-1.11203	Mito-EBR
	FBgn0262114	2.63451	0.438711	Others
	FBgn0001122	2.51791	0.674892	Others
	FBgn0033526	2.64147	-1.31835	Others
	FBgn0261862	2.19398	0.188019	Mito-Others
	FBgn0261862	2.50736	0.188019	Mito-Others
	FBgn0033528	2.80163	-0.628756	Others
	FBgn0283521	2.69454	0.176224	Others
	FBgn0263102	2.26599	0.377435	Others
	FBgn0263102	2.74194	0.377435	Others
	FBgn0263102	2.24712	0.377435	Others
	FBgn0033543	2.29957	-0.533018	Others
	FBgn0024956	3.06844	-0.450129	Others
	FBgn0053144	2.71331	0.605445	Others
	FBgn0027499	3.39861	0.524069	Others
	FBgn0027499	2.35136	0.524069	Others
	FBgn0033547	2.81634	-1.70741	Mito-Others
	FBgn0033548	2.77743	-1.35259	Others
	FBgn0029134	2.8956	-0.592431	Others
	FBgn0033556	2.77523	0.676373	Others
	FBgn0050015	2.29866	0.569955	Others
	FBgn0050015	2.18303	0.569955	Others
	FBgn0050015	2.68539	0.569955	Others
	FBgn0263510	2.29022	-0.577671	Others
	FBgn0040765	2.23673	0.550345	Others
	FBgn0033581	2.67245	-0.823637	Others
	FBgn0003396	2.21349	1.36452	Others
	FBgn0003396	2.46654	1.36452	Others
	FBgn0003396	2.33267	1.36452	Others
	FBgn0033584	2.97159	-1.33719	Others
	FBgn0033607	2.17849	-0.577586	Others
	FBgn0015582	2.25514	-0.616314	Mito-Others
	FBgn0259238	2.23016	-1.8732	Others
	FBgn0259238	2.49125	-1.8732	Others
	FBgn0024188	2.36316	-1.1301	Others
	FBgn0021795	2.89575	-1.68729	Others
	FBgn0015872	2.32057	0.565701	Others
	FBgn0015872	2.35792	0.565701	Others
	FBgn0015872	2.23671	0.565701	Others
	FBgn0033635	2.39606	-0.749146	Others
	FBgn0000581	2.58204	0.668037	Others
	FBgn0033636	2.75702	1.23401	Others
	FBgn0033636	2.18351	1.23401	Others
	FBgn0033638	2.16975	0.529758	Others
	FBgn0033638	2.36185	0.529758	Others
	FBgn0033638	2.56721	0.529758	Others
	FBgn0033639	2.71606	1.52322	Others
	FBgn0033649	2.29472	1.52183	Others
	FBgn0033653	2.7556	-0.887349	Others
	FBgn0013756	2.64359	-0.861068	Others
	FBgn0033663	2.8345	-1.72694	Others
	FBgn0033663	2.63462	-1.72694	Others
	FBgn0033665	2.48318	-0.353452	Others
	FBgn0033669	2.47645	0.649123	Others
	FBgn0011704	2.3961	-1.77439	Others
	FBgn0033673	2.56084	-0.353945	Mito-Others
	FBgn0259985	3.52287	-0.465433	Others
	FBgn0033677	2.50496	1.13392	Others
	FBgn0010339	2.6578	-1.24922	Others
	FBgn0027495	2.5804	-0.875086	Others
	FBgn0033688	3.81454	-1.15076	Others
	FBgn0014184	3.35206	0.636181	Others
	FBgn0014184	2.28711	0.636181	Others
	FBgn0014184	2.46815	0.636181	Others
	FBgn0033690	2.58599	-0.8251	Mito-Others
	FBgn0033699	2.35415	-0.864879	Others
	FBgn0033702	2.31689	0.503689	Others
	FBgn0033716	2.5829	-0.743283	Others
	FBgn0033734	2.59423	-0.961034	Mito-Others
	FBgn0033735	2.3531	-0.220673	Others
	FBgn0033737	2.60807	-0.915619	Others
	FBgn0033738	3.37511	-0.299168	Others
	FBgn0033739	2.48375	1.35274	Others
	FBgn0050334	2.44832	1.04298	Others
	FBgn0010238	3.04439	-0.35544	Others
	FBgn0045063	2.19689	-0.475483	Others
	FBgn0045063	2.20568	-0.475483	Others
	FBgn0053632	2.40045	7.29052	Others
	FBgn0011592	2.64553	0.909083	Others
	FBgn0033754	2.66435	-0.955701	Others
	FBgn0022764	2.25303	0.197012	Others
	FBgn0022764	2.75872	0.197012	Others
	FBgn0027356	2.72716	-0.827856	Others
	FBgn0004435	2.57153	1.24079	Others
	FBgn0004435	2.30862	1.24079	Others
	FBgn0028683	2.56055	-1.0038	Others
	FBgn0011604	2.79505	-0.436023	Others
	FBgn0033760	2.31169	-1.38939	Others
	FBgn0033761	2.35268	-1.36518	Mito-Others
	FBgn0261673	2.57342	0.484585	Others
	FBgn0026619	2.59281	-0.632944	Others
	FBgn0011227	2.95432	-2.18159	Mito-EBR
	FBgn0086904	3.19312	-0.872551	Others
	FBgn0033777	2.59126	0.879913	Others
	FBgn0000181	2.59891	-0.930143	Others
	FBgn0013305	2.3517	1.0385	Others
	FBgn0010488	2.74295	-0.306601	Others
	FBgn0033783	2.7034	0.287406	Others
	FBgn0033785	2.95683	-0.974224	Others
	FBgn0265623	2.2093	1.24924	Others
	FBgn0259876	2.69764	-0.766359	Others
	FBgn0020370	3.13958	-1.16098	Others
	FBgn0053182	2.60466	0.702139	Others
	FBgn0033808	2.74658	-1.16982	Mito-Others
	FBgn0033810	2.298	-0.59413	Others
	FBgn0011763	3.02073	-0.533692	Others
	FBgn0011763	3.0006	-0.533692	Others
	FBgn0011763	2.96086	-0.533692	Others
	FBgn0033812	2.59296	-0.291844	Others
	FBgn0052843	2.5621	0.828446	Others
	FBgn0013765	2.42324	0.748943	Others
	FBgn0013765	2.2914	0.748943	Others
	FBgn0033844	2.58395	-0.372216	Others
	FBgn0033845	3.12034	-0.692211	Others
	FBgn0033846	2.72083	-1.07484	Others
	FBgn0024556	2.45049	-1.54864	Mito-EBR
	FBgn0033846	2.69104	-1.07484	Others
	FBgn0260964	2.39846	1.27104	Others
	FBgn0033853	2.30647	0.315985	Others
	FBgn0033853	2.3147	0.315985	Others
	FBgn0033853	2.17214	0.315985	Others
	FBgn0033853	2.34758	0.315985	Others
	FBgn0033853	2.47858	0.315985	Others
	FBgn0027581	2.30197	0.922544	Others
	FBgn0000633	2.17338	1.49836	Others
	FBgn0033872	2.26785	0.941167	Others
	FBgn0033876	2.34749	1.18473	Others
	FBgn0086356	2.51674	-1.47247	Others
	FBgn0013733	2.51428	0.447574	Others
	FBgn0013733	2.65118	0.447574	Others
	FBgn0262739	2.25143	1.14191	Others
	FBgn0262739	2.37381	1.14191	Others
	FBgn0033886	2.5494	-0.253552	Others
	FBgn0013770	2.30982	0.268313	Others
	FBgn0261975	2.64484	-0.983309	Others
	FBgn0261975	2.23429	-0.983309	Others
	FBgn0033890	2.65114	-2.45119	Others
	FBgn0002643	2.32589	1.25716	Others
	FBgn0002643	2.14877	1.25716	Others
	FBgn0040752	2.45838	1.17189	Others
	FBgn0033899	3.18772	-0.473402	Others
	FBgn0033903	2.63325	-0.225427	Mito-Others
	FBgn0033906	2.50394	-0.491647	Others
	FBgn0000289	3.02169	0.153316	Others
	FBgn0033912	2.87673	-0.500998	Others
	FBgn0033912	2.7052	-0.500998	Others
	FBgn0001220	2.65685	-0.1198	Mito-EBR
	FBgn0033918	2.49252	-0.493032	Mito-EBR
	FBgn0033921	2.85422	-1.709	Others
	FBgn0033925	2.92591	0.686606	Others
	FBgn0033929	2.64431	0.235405	Others
	FBgn0013725	2.48014	0.967669	Others
	FBgn0033945	2.74983	2.45473	Others
	FBgn0010638	2.82052	-2.04654	Others
	FBgn0028689	2.88917	-0.611163	Others
	FBgn0020767	2.64993	0.693446	Others
	FBgn0015602	2.37765	-0.244098	Others
	FBgn0015602	2.41355	-0.244098	Others
	FBgn0027596	2.44606	0.275059	Others
	FBgn0027596	2.71003	0.275059	Others
	FBgn0027596	2.64987	0.275059	Others
	FBgn0027596	3.28539	0.275059	Others
	FBgn0027596	2.14723	0.275059	Others
	FBgn0033984	2.70538	0.746036	Others
	FBgn0261854	2.59505	0.245027	Others
	FBgn0033987	2.3704	0.832206	Others
	FBgn0033987	2.46805	0.832206	Others
	FBgn0033987	2.53952	0.832206	Others
	FBgn0033988	2.72092	1.75255	Others
	FBgn0033989	3.0695	-1.18914	Mito-Others
	FBgn0015371	2.8708	1.36543	Others
	FBgn0015371	2.89865	1.36543	Others
	FBgn0015371	3.29265	1.36543	Others
	FBgn0262954	2.35141	-0.584445	Others
	FBgn0034001	2.86927	-1.50726	Mito-EBR
	FBgn0259878	2.1969	1.14834	Others
	FBgn0286785	2.35467	0.436236	Others
	FBgn0265194	2.89111	1.33258	Others
	FBgn0265194	2.40929	1.33258	Others
	FBgn0265194	2.7457	1.33258	Others
	FBgn0034013	2.75404	1.08664	Others
	FBgn0034013	2.50957	1.08664	Others
	FBgn0000996	2.89502	-2.44168	Others
	FBgn0286813	2.42299	-0.363755	Others
	FBgn0019968	2.64598	0.879053	Others
	FBgn0050467	2.53446	-0.393317	Others
	FBgn0022097	2.82118	-0.540761	Others
	FBgn0050466	2.21364	1.08832	Others
	FBgn0034035	2.741	-0.610202	Others
	FBgn0053465	2.62964	-2.59862	Others
	FBgn0034046	2.85765	0.356091	Others
	FBgn0022160	2.20281	-1.53717	Mito-Others
	FBgn0053463	2.19531	6.72431	Others
	FBgn0264089	2.30087	1.16663	Others
	FBgn0264089	2.2257	1.16663	Others
	FBgn0015247	2.90219	0.591806	Others
	FBgn0034058	3.6378	-0.594971	Mito-Others
	FBgn0034061	2.82987	-1.64733	Others
	FBgn0034063	2.50691	1.58539	Others
	FBgn0010590	3.12827	-0.656786	Others
	FBgn0034066	2.22949	-0.711455	Others
	FBgn0034072	2.72972	0.68454	Others
	FBgn0034072	2.90429	0.68454	Others
	FBgn0050094	2.56486	-1.21518	Others
	FBgn0027091	2.48248	-0.186664	Others
	FBgn0015754	2.20181	0.528511	Others
	FBgn0015754	2.16662	0.528511	Others
	FBgn0034086	2.71268	-0.527441	Others
	FBgn0034087	2.18893	-0.766847	Others
	FBgn0015295	2.65275	0.403477	Others
	FBgn0034091	3.09395	-0.595138	Others
	FBgn0034091	2.39555	-0.595138	Others
	FBgn0034091	2.99197	-0.595138	Others
	FBgn0034091	2.3799	-0.595138	Others
	FBgn0034095	2.63826	1.43914	Others
	FBgn0261612	2.9764	1.01266	Others
	FBgn0001308	2.72597	-0.761487	Others
	FBgn0034110	2.64904	1.25901	Others
	FBgn0010611	2.71979	-0.0819489	Mito-Others
	FBgn0010611	2.29924	-0.0819489	Mito-Others
	FBgn0034118	2.61841	-0.48283	Others
	FBgn0262560	2.17391	-0.527939	Others
	FBgn0011260	2.40566	-0.388557	Others
	FBgn0011260	2.39841	-0.388557	Others
	FBgn0011260	2.22964	-0.388557	Others
	FBgn0034135	2.26063	1.11607	Others
	FBgn0034138	2.48316	-0.539446	Others
	FBgn0016131	2.67543	-0.856374	Others
	FBgn0003274	2.49733	-0.709387	Others
	FBgn0003274	2.44538	-0.709387	Others
	FBgn0034141	2.45627	0.302809	Others
	FBgn0034142	2.96329	-1.80573	Others
	FBgn0034142	2.33364	-1.80573	Others
	FBgn0034145	2.70464	-0.579696	Others
	FBgn0034145	2.37319	-0.579696	Others
	FBgn0010213	2.59024	-1.69328	Mito-Others
	FBgn0025830	2.5859	-0.506239	Others
	FBgn0026533	2.21877	-0.461533	Others
	FBgn0028737	2.34746	-0.679485	Others
	FBgn0034180	2.71557	0.539478	Others
	FBgn0010591	2.55194	-1.09813	Others
	FBgn0010226	2.91083	-0.382792	Others
	FBgn0265487	2.73118	0.89645	Others
	FBgn0265487	2.93088	0.89645	Others
	FBgn0010620	2.15641	0.142207	Others
	FBgn0010620	2.15853	0.142207	Others
	FBgn0016697	2.48133	-1.18904	Others
	FBgn0286070	2.25524	1.12139	Others
	FBgn0034214	2.65301	-0.349708	Others
	FBgn0025716	2.72718	-1.35019	Others
	FBgn0027506	2.71789	0.994729	Others
	FBgn0028953	2.35167	0.536378	Others
	FBgn0028953	2.17664	0.536378	Others
	FBgn0028953	2.29402	0.536378	Others
	FBgn0283508	2.53589	-3.2278	Others
	FBgn0263197	2.60942	0.529951	Others
	FBgn0034237	2.4771	0.223804	Others
	FBgn0028382	2.86359	-0.651731	Others
	FBgn0010409	3.08669	-0.434829	Others
	FBgn0034243	3.23584	0.571605	Others
	FBgn0034245	2.57338	-1.68072	Mito-EBR
	FBgn0016701	2.28609	0.495817	Others
	FBgn0034248	2.34956	-0.713945	Mito-EBR
	FBgn0034249	2.59801	-0.929635	Others
	FBgn0034255	2.21598	2.58432	Others
	FBgn0034258	2.65651	-0.306652	Others
	FBgn0050109	2.36097	-0.645528	Mito-Others
	FBgn0034259	2.28373	-0.359244	Mito-Others
	FBgn0045800	2.50371	1.27715	Others
	FBgn0034265	2.55148	-0.457473	Others
	FBgn0027572	2.71604	-0.278034	Others
	FBgn0027572	2.46158	-0.278034	Others
	FBgn0259211	2.43495	1.25214	Others
	FBgn0015522	2.18467	1.12675	Others
	FBgn0015522	2.52052	1.12675	Others
	FBgn0034282	3.14678	-0.250295	Others
	FBgn0034299	2.79683	-1.14049	Mito-Others
	FBgn0003520	2.31755	0.964254	Others
	FBgn0040465	2.63286	1.58391	Others
	FBgn0265297	2.83374	0.442729	Others
	FBgn0265297	2.59318	0.442729	Others
	FBgn0265297	3.03283	0.442729	Others
	FBgn0062440	2.68866	-0.649481	Mito-Others
	FBgn0034304	2.15358	0.376074	Others
	FBgn0022238	2.73209	-0.447312	Others
	FBgn0022238	2.67518	-0.447312	Others
	FBgn0027836	2.33878	1.596	Others
	FBgn0034312	2.15145	0.680479	Others
	FBgn0034313	2.35272	0.405764	Others
	FBgn0034321	2.70258	1.70227	Others
	FBgn0285917	3.27054	0.655454	Others
	FBgn0063499	2.33311	1.07287	Others
	FBgn0027835	2.58763	-1.15043	Others
	FBgn0027835	2.67294	-1.15043	Others
	FBgn0034345	2.61495	-0.63649	Others
	FBgn0034345	2.2008	-0.63649	Others
	FBgn0034346	2.6054	-0.867169	Others
	FBgn0261477	2.49123	0.391428	Others
	FBgn0034351	2.24072	-0.790129	Mito-EBR
	FBgn0034352	2.2084	3.92271	Others
	FBgn0262476	2.77932	1.92906	Others
	FBgn0050115	2.3661	0.566328	Others
	FBgn0050115	2.28119	0.566328	Others
	FBgn0034361	2.35641	-0.851135	Mito-EBR
	FBgn0000566	2.33817	-1.10735	Others
	FBgn0034368	2.56098	-0.326455	Mito-Others
	FBgn0050122	3.0227	-0.846313	Others
	FBgn0023214	2.18839	1.31978	Others
	FBgn0262103	2.83519	0.481976	Others
	FBgn0262103	2.60149	0.481976	Others
	FBgn0053147	2.64827	1.89586	Others
	FBgn0034392	2.44079	-0.299829	Others
	FBgn0034392	2.21314	-0.299829	Others
	FBgn0034394	2.40514	-0.414344	Others
	FBgn0010551	2.35075	0.150621	Mito-Others
	FBgn0010053	2.66353	-1.98385	Others
	FBgn0034417	2.19101	-0.36062	Others
	FBgn0034417	2.53182	-0.36062	Others
	FBgn0027535	2.80897	-0.409102	Others
	FBgn0000578	2.54705	0.737731	Others
	FBgn0263395	3.07203	0.797555	Others
	FBgn0053453	2.14833	6.1106	Others
	FBgn0003254	2.21535	4.3534	Others
	FBgn0034425	2.55326	0.333	Others
	FBgn0013954	2.76792	-1.52348	Others
	FBgn0034430	2.43223	-0.427287	Others
	FBgn0086358	2.62369	0.365479	Others
	FBgn0034432	2.53689	-1.01885	Mito-Others
	FBgn0034433	2.25079	0.389879	Others
	FBgn0034436	2.62784	-0.546625	Others
	FBgn0034436	2.59467	-0.546625	Others
	FBgn0261439	2.49619	-1.08058	Mito-EBR
	FBgn0263391	2.98911	-0.612365	Others
	FBgn0263391	2.25416	-0.612365	Others
	FBgn0012051	3.10974	0.532662	Others
	FBgn0013325	3.08934	-0.708617	Others
	FBgn0266711	2.51057	-0.306063	Others
	FBgn0284243	2.68393	-1.55961	Others
	FBgn0034447	2.78996	-1.67951	Others
	FBgn0260934	2.25379	0.788299	Others
	FBgn0261456	2.99643	-0.505455	Others
	FBgn0003435	2.1848	1.07037	Others
	FBgn0003435	2.28872	1.07037	Others
	FBgn0003435	2.85812	1.07037	Others
	FBgn0034476	3.22295	1.41709	Others
	FBgn0034488	2.98983	-0.979261	Others
	FBgn0025720	2.26352	0.267013	Others
	FBgn0034500	2.31531	-2.06828	Others
	FBgn0027529	2.20881	-0.446224	Others
	FBgn0034503	2.52825	-0.672089	Others
	FBgn0034521	2.69369	-0.762033	Others
	FBgn0034534	2.1604	0.689504	Others
	FBgn0034542	3.07836	1.59985	Others
	FBgn0034542	2.96225	1.59985	Others
	FBgn0034542	3.58294	1.59985	Others
	FBgn0000615	2.76342	-1.30307	Others
	FBgn0034564	3.80288	-1.05287	Others
	FBgn0034570	2.56391	0.770526	Others
	FBgn0034570	3.08672	0.770526	Others
	FBgn0034570	2.61736	0.770526	Others
	FBgn0034576	2.30148	-1.33193	Mito-EBR
	FBgn0034579	2.42991	-1.4293	Mito-EBR
	FBgn0034583	2.1679	-0.966168	Others
	FBgn0003748	2.28269	-0.246193	Others
	FBgn0003748	2.62703	-0.246193	Others
	FBgn0085425	2.34906	-0.846888	Others
	FBgn0021872	2.60175	0.591814	Others
	FBgn0050389	2.70772	0.347379	Others
	FBgn0265180	2.23875	-1.34978	Others
	FBgn0265191	2.70243	-2.00206	Others
	FBgn0265191	2.37633	-2.00206	Others
	FBgn0034606	3.47037	0.556009	Others
	FBgn0034614	2.65595	-2.76247	Others
	FBgn0020306	2.32733	-0.344665	Others
	FBgn0010470	2.24272	-0.715689	Others
	FBgn0010470	2.70034	-0.715689	Others
	FBgn0010470	2.36963	-0.715689	Others
	FBgn0043070	2.48889	0.763148	Others
	FBgn0034636	2.47174	0.792914	Others
	FBgn0034636	2.91046	0.792914	Others
	FBgn0034638	2.78282	0.956069	Others
	FBgn0034641	2.53853	-0.330287	Others
	FBgn0034644	3.18959	1.46908	Others
	FBgn0259711	2.66426	2.32717	Others
	FBgn0034654	2.72982	-0.535408	Others
	FBgn0003687	2.24109	-0.606015	Others
	FBgn0004362	2.70967	-1.10164	Others
	FBgn0010228	3.02391	-0.88168	Others
	FBgn0010228	2.40496	-0.88168	Others
	FBgn0010228	2.21199	-0.88168	Others
	FBgn0034657	2.21018	-1.2359	Others
	FBgn0085397	2.16564	1.54636	Others
	FBgn0085397	2.15978	1.54636	Others
	FBgn0085397	2.52618	1.54636	Others
	FBgn0265192	2.61261	0.935462	Others
	FBgn0067102	2.6539	0.584759	Others
	FBgn0243516	2.67744	1.15766	Others
	FBgn0034703	2.82762	-0.460166	Others
	FBgn0013272	2.57565	0.204758	Others
	FBgn0034720	2.23195	1.32417	Others
	FBgn0003175	3.93536	1.08561	Others
	FBgn0003175	2.66464	1.08561	Others
	FBgn0003175	2.31888	1.08561	Others
	FBgn0034743	3.00274	-0.655003	Others
	FBgn0034744	2.46104	0.420085	Others
	FBgn0261596	2.70985	-0.458737	Others
	FBgn0034753	2.74116	-1.5376	Mito-Others
	FBgn0020257	2.64069	1.25528	Others
	FBgn0028371	2.22204	0.387517	Others
	FBgn0011211	3.07489	-1.6909	Mito-EBR
	FBgn0000405	2.94331	-2.73323	Others
	FBgn0010078	3.06439	-0.551354	Others
	FBgn0034792	2.35908	-0.586137	Mito-Others
	FBgn0034793	2.54084	0.768596	Mito-Others
	FBgn0261564	2.79399	-0.474469	Others
	FBgn0034802	2.93841	-1.00944	Others
	FBgn0034803	2.20179	-0.637432	Others
	FBgn0261584	2.42798	-1.4526	Others
	FBgn0021979	2.72154	-0.455013	Others
	FBgn0003062	3.09684	-1.27181	Others
	FBgn0085400	2.21084	1.14707	Others
	FBgn0040660	2.71914	-0.891205	Mito-Others
	FBgn0050411	3.1265	1.15497	Others
	FBgn0034861	2.94342	-1.2334	Others
	FBgn0015372	2.41508	0.513345	Others
	FBgn0034876	2.28635	-0.32511	Others
	FBgn0010501	2.50368	0.931499	Others
	FBgn0266377	2.52649	0.807722	Others
	FBgn0266377	2.31368	0.807722	Others
	FBgn0266377	2.69361	0.807722	Others
	FBgn0002174	2.54829	-1.29943	Mito-Others
	FBgn0011297	3.39983	-0.893857	Others
	FBgn0034902	2.38779	-0.539671	Mito-Others
	FBgn0025335	2.75552	1.04314	Others
	FBgn0025352	2.46825	-1.21959	Mito-Others
	FBgn0011236	2.2557	0.668579	Others
	FBgn0011236	2.26254	0.668579	Others
	FBgn0025336	2.73292	-1.31972	Mito-Others
	FBgn0034921	2.48669	-0.443207	Others
	FBgn0034936	2.49474	-0.462353	Mito-Others
	FBgn0034938	2.50207	-0.732003	Mito-Others
	FBgn0034940	3.3017	-1.18284	Mito-Others
	FBgn0020764	2.56023	1.64375	Mito-Others
	FBgn0034948	2.40097	0.636385	Others
	FBgn0005612	3.32154	2.02393	Others
	FBgn0005612	2.17564	2.02393	Others
	FBgn0283509	2.5494	0.222919	Others
	FBgn0034958	2.53574	0.435213	Others
	FBgn0034961	3.69771	0.596125	Others
	FBgn0034963	3.33506	-0.507222	Others
	FBgn0003353	4.19759	0.659339	Others
	FBgn0003353	2.32376	0.659339	Others
	FBgn0028552	2.63618	0.457762	Others
	FBgn0034968	3.46816	-0.766193	Others
	FBgn0023170	3.08476	-1.02328	Others
	FBgn0283666	2.93884	0.411082	Others
	FBgn0034970	2.24692	0.455124	Others
	FBgn0034971	3.04414	0.137082	Others
	FBgn0086129	3.21833	-0.439306	Others
	FBgn0023081	2.67215	-0.431634	Others
	FBgn0034976	3.33229	0.801833	Others
	FBgn0041582	2.64067	0.286736	Others
	FBgn0034982	2.3166	-1.18265	Others
	FBgn0019643	2.283	-0.603827	Others
	FBgn0015544	2.85516	-0.549808	Others
	FBgn0259937	2.54716	-0.893313	Others
	FBgn0034988	2.14875	-0.663774	Mito-Others
	FBgn0050418	2.83437	1.3037	Others
	FBgn0034997	2.57086	-0.42995	Others
	FBgn0034999	2.24031	-1.28189	Others
	FBgn0003888	2.2374	0.245223	Others
	FBgn0004101	2.69961	-0.36266	Others
	FBgn0035001	2.23522	0.456049	Others
	FBgn0035016	2.97567	-0.216662	Others
	FBgn0035023	3.22557	1.48241	Others
	FBgn0035023	2.6773	1.48241	Others
	FBgn0035023	2.28578	1.48241	Others
	FBgn0035025	2.51234	-0.802889	Others
	FBgn0035032	3.04541	-1.60003	Mito-EBR
	FBgn0035035	2.30373	0.508205	Others
	FBgn0035039	3.3254	-0.490743	Mito-Others
	FBgn0035044	2.32009	-0.50899	Mito-Others
	FBgn0035046	2.50943	-1.36638	Mito-EBR
	FBgn0035059	2.7218	0.403728	Others
	FBgn0035063	2.35509	-0.592184	Others
	FBgn0035064	2.20825	-0.926286	Mito-EBR
	FBgn0041205	2.72954	0.527935	Others
	FBgn0023181	2.90865	-1.01551	Others
	FBgn0000157	2.16948	0.927442	Others
	FBgn0085442	2.54509	0.370929	Others
	FBgn0035077	2.36706	2.53581	Others
	FBgn0066084	3.34669	-1.7883	Others
	FBgn0060296	2.36459	-0.235504	Others
	FBgn0022343	2.94864	-1.61251	Others
	FBgn0035082	2.93461	-0.284823	Others
	FBgn0035083	3.62617	0.538206	Others
	FBgn0035083	2.62428	0.538206	Others
	FBgn0035085	2.39291	-0.577131	Others
	FBgn0035088	3.08653	-0.570805	Mito-EBR
	FBgn0010435	2.24271	0.300558	Others
	FBgn0004055	2.22926	0.264208	Others
	FBgn0004919	2.32126	1.69109	Others
	FBgn0035094	2.25007	0.412762	Others
	FBgn0050428	2.34947	-0.71404	Others
	FBgn0020386	2.27834	1.31716	Others
	FBgn0020386	2.57153	1.31716	Others
	FBgn0035099	2.60461	0.674897	Others
	FBgn0035101	2.18883	0.432865	Others
	FBgn0035106	2.54798	0.460857	Others
	FBgn0024945	2.73536	0.244979	Mito-Others
	FBgn0025592	2.75366	-0.71931	Mito-Others
	FBgn0053229	2.40917	1.88001	Others
	FBgn0053229	2.3147	1.88001	Others
	FBgn0000541	2.76477	0.385439	Others
	FBgn0035120	2.72778	-0.829798	Others
	FBgn0035121	2.36366	-2.17325	Mito-Others
	FBgn0029002	2.19402	0.595656	Others
	FBgn0264707	2.73461	0.908309	Others
	FBgn0004373	2.88147	0.944754	Others
	FBgn0052344	2.41508	-0.659336	Others
	FBgn0035132	2.23953	0.795776	Others
	FBgn0261985	2.73417	0.385853	Others
	FBgn0261985	3.02105	0.385853	Others
	FBgn0001316	2.59386	0.764429	Others
	FBgn0001316	2.20598	0.764429	Others
	FBgn0035141	2.92715	-1.28677	Others
	FBgn0035142	2.56433	1.64561	Others
	FBgn0035144	3.16129	2.09586	Others
	FBgn0016715	2.43445	-0.399815	Mito-Others
	FBgn0035147	2.31947	-0.407049	Others
	FBgn0035148	2.17309	-0.322111	Others
	FBgn0035149	3.03022	-0.656052	Others
	FBgn0035151	2.91806	0.774272	Others
	FBgn0035157	2.22659	0.696086	Others
	FBgn0035157	2.27983	0.696086	Others
	FBgn0035159	3.00325	0.795467	Others
	FBgn0035160	2.6912	1.54237	Others
	FBgn0035160	2.37052	1.54237	Others
	FBgn0035161	2.50414	6.62466	Others
	FBgn0035162	2.20585	-1.62853	Others
	FBgn0260755	2.28857	1.31601	Others
	FBgn0260756	2.26809	1.16666	Others
	FBgn0035169	2.83628	-1.07281	Mito-Others
	FBgn0035170	2.80946	1.13568	Others
	FBgn0054056	2.35043	1.41672	Others
	FBgn0028999	2.21676	-2.90831	Others
	FBgn0024277	2.41603	0.491163	Others
	FBgn0035181	2.42084	-0.858194	Others
	FBgn0025525	2.24401	0.487315	Others
	FBgn0035186	2.22471	-0.33318	Others
	FBgn0035189	2.56636	-0.907155	Others
	FBgn0004425	2.23772	-5.61302	Others
	FBgn0025682	2.4405	-1.36127	Others
	FBgn0035203	2.40689	-1.13966	Mito-Others
	FBgn0035204	2.88328	-1.24831	Others
	FBgn0010246	2.96481	-0.736738	Others
	FBgn0010246	2.35302	-0.736738	Others
	FBgn0011361	2.45343	-1.38304	Mito-EBR
	FBgn0010786	2.8364	1.54832	Others
	FBgn0035213	2.31838	-0.602499	Others
	FBgn0267487	2.73323	0.27831	Others
	FBgn0003295	2.62087	1.37014	Others
	FBgn0267487	2.26066	0.27831	Others
	FBgn0011204	2.67959	-0.891572	Others
	FBgn0261243	2.79698	-0.872277	Mito-Others
	FBgn0035232	2.80962	-0.190039	Others
	FBgn0035236	2.53471	0.369392	Others
	FBgn0035237	2.63397	0.326965	Others
	FBgn0035237	2.9029	0.326965	Others
	FBgn0013753	2.68035	0.598607	Others
	FBgn0025725	2.89288	-1.10642	Mito-Others
	FBgn0035249	2.88813	-0.511266	Others
	FBgn0026372	4.55542	-0.120081	Others
	FBgn0027594	2.78843	0.882879	Others
	FBgn0035265	2.17528	1.66304	Others
	FBgn0035267	3.66808	0.932988	Others
	FBgn0011573	2.45962	-0.414265	Others
	FBgn0035283	2.87061	0.435067	Others
	FBgn0035285	2.83398	0.260294	Others
	FBgn0000109	2.45752	-0.842644	Others
	FBgn0262030	2.47634	6.78592	Others
	FBgn0086906	3.07758	-0.0909796	Others
	FBgn0052311	2.39789	0.621951	Others
	FBgn0015359	3.37462	-0.71248	Others
	FBgn0015360	2.96767	-0.424978	Others
	FBgn0035335	3.4619	-1.29521	Mito-EBR
	FBgn0035337	2.70327	-0.705613	Others
	FBgn0266696	2.39323	0.311041	Others
	FBgn0266696	2.66428	0.311041	Others
	FBgn0266696	2.82201	0.311041	Others
	FBgn0266696	2.30397	0.311041	Others
	FBgn0035343	2.57927	-1.98297	Others
	FBgn0035346	2.52651	1.53667	Others
	FBgn0266696	2.76632	0.311041	Others
	FBgn0010905	2.61264	1.14347	Others
	FBgn0010909	2.66012	0.77335	Others
	FBgn0016794	2.47807	0.766942	Others
	FBgn0052296	2.25758	0.526762	Others
	FBgn0263392	2.35062	0.634709	Others
	FBgn0263392	2.37882	0.634709	Others
	FBgn0262593	2.24571	1.74948	Others
	FBgn0040308	2.28947	-2.00345	Others
	FBgn0040308	2.58076	-2.00345	Others
	FBgn0052485	2.15778	1.40473	Others
	FBgn0035393	2.3592	-1.08591	Others
	FBgn0266918	2.51442	1.01858	Others
	FBgn0035397	2.26099	0.731334	Others
	FBgn0035397	2.30591	0.731334	Others
	FBgn0035397	2.23131	0.731334	Others
	FBgn0035397	2.33554	0.731334	Others
	FBgn0035397	3.43862	0.731334	Others
	FBgn0035398	2.70214	-0.276011	Others
	FBgn0035402	2.84429	-1.5499	Others
	FBgn0035405	3.58809	0.371773	Others
	FBgn0024194	2.27645	-0.725049	Others
	FBgn0035407	2.65787	0.66077	Others
	FBgn0283724	2.97818	0.654971	Others
	FBgn0001233	3.12461	-0.119275	Others
	FBgn0001233	2.94614	-0.119275	Others
	FBgn0047135	2.8953	-1.60986	Others
	FBgn0035422	3.00364	-0.26332	Others
	FBgn0035425	2.40233	0.887142	Others
	FBgn0035431	2.78274	0.296481	Others
	FBgn0035431	2.886	0.296481	Others
	FBgn0035431	2.37918	0.296481	Others
	FBgn0035432	2.60858	0.266605	Others
	FBgn0035437	2.52618	0.534153	Others
	FBgn0004167	2.60385	0.240534	Others
	FBgn0035445	2.31809	1.51194	Others
	FBgn0014388	2.38443	1.29042	Others
	FBgn0014388	2.52654	1.29042	Others
	FBgn0026259	2.53109	-0.645277	Others
	FBgn0035449	2.65302	-0.426286	Others
	FBgn0259224	2.19148	0.372892	Others
	FBgn0259224	2.32264	0.372892	Others
	FBgn0035458	2.17585	6.5072	Others
	FBgn0052264	2.77345	1.10886	Others
	FBgn0052264	2.37853	1.10886	Others
	FBgn0035464	2.46123	-1.5726	Others
	FBgn0004888	2.72544	-0.834684	Mito-Others
	FBgn0004875	2.42935	0.856397	Others
	FBgn0035470	2.76862	-0.573754	Others
	FBgn0003943	2.32858	0.694507	Others
	FBgn0035471	2.17018	-1.31022	Others
	FBgn0041147	2.73011	-1.21045	Others
	FBgn0035473	2.5297	-1.28446	Mito-EBR
	FBgn0004910	2.81874	0.5629	Others
	FBgn0004910	2.56831	0.5629	Others
	FBgn0004880	2.51925	2.32356	Others
	FBgn0035496	2.44511	-0.49833	Others
	FBgn0035498	2.33235	0.174333	Others
	FBgn0028484	2.42529	0.603898	Others
	FBgn0028484	2.51834	0.603898	Others
	FBgn0260985	2.35065	-0.393271	Others
	FBgn0001257	3.46659	2.08496	Others
	FBgn0035517	2.20228	0.169925	Others
	FBgn0035519	2.94859	-0.657911	Others
	FBgn0035524	2.61468	-1.0552	Others
	FBgn0041630	2.2948	-0.584797	Others
	FBgn0035528	2.62192	0.534676	Others
	FBgn0052251	2.71468	-2.9959	Others
	FBgn0035533	2.26285	0.266438	Others
	FBgn0035534	2.35419	-1.07913	Mito-EBR
	FBgn0035538	2.26417	1.14007	Others
	FBgn0035540	2.8713	1.18236	Others
	FBgn0035542	2.69684	0.868731	Others
	FBgn0035542	2.22998	0.868731	Others
	FBgn0035548	2.15996	0.80384	Others
	FBgn0035557	2.29428	0.740162	Others
	FBgn0035558	2.41679	-0.984902	Others
	FBgn0035558	2.36796	-0.984902	Others
	FBgn0262733	2.68255	0.505271	Others
	FBgn0262733	2.24434	0.505271	Others
	FBgn0262733	2.39431	0.505271	Others
	FBgn0027085	2.92777	-1.06142	Mito-EBR
	FBgn0005775	2.27668	1.18372	Others
	FBgn0035589	3.5127	1.14563	Others
	FBgn0052423	2.18395	0.202941	Others
	FBgn0052423	2.35544	0.202941	Others
	FBgn0052423	2.33638	0.202941	Others
	FBgn0052423	2.86652	0.202941	Others
	FBgn0016031	2.64605	-0.529309	Others
	FBgn0035601	2.26684	-0.971298	Others
	FBgn0035601	2.63656	-0.971298	Others
	FBgn0029118	2.62922	-1.46655	Mito-Others
	FBgn0040239	2.44572	0.522923	Others
	FBgn0015766	2.81211	1.16029	Others
	FBgn0263106	2.4314	1.80631	Others
	FBgn0260936	2.71226	-0.189079	Others
	FBgn0086694	2.74418	-0.511662	Others
	FBgn0035639	2.82957	-0.498759	Others
	FBgn0052407	2.21245	-1.00633	Others
	FBgn0053523	2.5072	-0.207199	Others
	FBgn0053523	2.29898	-0.207199	Others
	FBgn0002638	2.80588	-1.03146	Others
	FBgn0035677	2.31861	2.00074	Others
	FBgn0061492	2.49407	-1.47795	Others
	FBgn0052405	2.47172	1.17013	Others
	FBgn0002526	2.35344	-1.13115	Others
	FBgn0001258	2.93703	-0.883338	Mito-Others
	FBgn0035699	2.23074	1.10129	Others
	FBgn0261801	3.05575	0.496223	Others
	FBgn0035702	3.12895	0.790595	Others
	FBgn0020251	2.25925	0.474597	Others
	FBgn0042185	2.58083	-1.13116	Mito-Others
	FBgn0035708	2.23052	0.972124	Others
	FBgn0035708	2.38174	0.972124	Others
	FBgn0035710	2.48719	-0.384995	Others
	FBgn0261934	2.36195	0.623519	Others
	FBgn0260660	2.20792	0.889805	Others
	FBgn0002775	2.69735	0.701176	Others
	FBgn0035753	2.5092	-0.526429	Others
	FBgn0028648	2.61976	-1.86942	Mito-EBR
	FBgn0012058	2.78004	-0.266244	Others
	FBgn0035767	2.31739	-0.791493	Others
	FBgn0019662	2.21324	0.999583	Others
	FBgn0035770	2.30481	-0.115445	Others
	FBgn0035771	2.5262	-1.14532	Others
	FBgn0035771	2.15898	-1.14532	Others
	FBgn0082598	2.31023	-0.245877	Others
	FBgn0016983	2.33893	-0.892175	Others
	FBgn0014011	2.15349	0.370492	Others
	FBgn0035793	2.37549	-0.473354	Others
	FBgn0035805	2.58122	-0.461324	Mito-Others
	FBgn0261788	2.28194	0.636059	Others
	FBgn0035811	2.44933	-0.72943	Mito-Others
	FBgn0016694	2.60956	0.813428	Others
	FBgn0035824	2.16614	1.1494	Others
	FBgn0035829	2.28603	-1.35212	Others
	FBgn0011817	2.49004	0.706487	Others
	FBgn0026263	2.16789	-0.783116	Others
	FBgn0026263	2.18486	-0.783116	Others
	FBgn0262579	2.33382	0.454184	Others
	FBgn0035833	2.66742	0.361244	Others
	FBgn0027549	2.55367	-0.371001	Others
	FBgn0026252	2.84842	-1.35334	Others
	FBgn0010350	2.48942	0.325081	Others
	FBgn0002899	2.60952	-2.43582	Others
	FBgn0020392	2.32408	-1.8441	Others
	FBgn0020392	2.357	-1.8441	Others
	FBgn0035848	2.4643	-0.575275	Mito-Others
	FBgn0035850	2.70977	1.032	Others
	FBgn0027569	2.39003	0.496235	Others
	FBgn0035872	2.91915	-1.1268	Others
	FBgn0035877	2.90937	1.54035	Others
	FBgn0001248	2.15671	-1.21822	Mito-Others
	FBgn0263352	2.85507	0.91773	Others
	FBgn0035896	2.67451	0.525347	Others
	FBgn0010825	2.40899	0.689009	Others
	FBgn0035906	2.30612	-0.908539	Others
	FBgn0024236	2.73101	0.419831	Others
	FBgn0024236	2.19343	0.419831	Others
	FBgn0260442	2.25978	0.677395	Others
	FBgn0260442	2.503	0.677395	Others
	FBgn0017430	3.41074	-0.674839	Others
	FBgn0017429	2.56321	-0.427779	Mito-Others
	FBgn0035918	2.6972	-1.20844	Others
	FBgn0011509	2.40645	-1.05737	Others
	FBgn0264307	2.19931	1.48236	Others
	FBgn0011787	2.52522	-2.13452	Mito-EBR
	FBgn0016070	2.71508	0.996328	Others
	FBgn0016070	3.09894	0.996328	Others
	FBgn0000116	2.48662	-2.70594	Mito-Others
	FBgn0000116	2.22125	-2.70594	Mito-Others
	FBgn0035960	2.39071	-1.03148	Mito-EBR
	FBgn0011206	2.34249	0.241775	Others
	FBgn0035964	2.63789	-0.790826	Mito-Others
	FBgn0035965	2.38891	-0.714519	Others
	FBgn0035978	2.41374	-0.887964	Others
	FBgn0085484	2.47424	-0.205775	Others
	FBgn0035981	2.27026	0.511556	Others
	FBgn0001225	2.58419	4.29247	Others
	FBgn0001224	2.19995	3.2271	Others
	FBgn0001226	3.2047	2.16801	Others
	FBgn0035983	2.36917	0.972536	Others
	FBgn0035983	2.53178	0.972536	Others
	FBgn0015218	2.80847	-0.802135	Others
	FBgn0035986	2.61259	1.11588	Others
	FBgn0023129	3.34313	-0.493911	Others
	FBgn0015296	3.43908	0.950622	Others
	FBgn0005533	2.4849	-0.599522	Others
	FBgn0040305	2.4537	0.458455	Others
	FBgn0040305	2.56104	0.458455	Others
	FBgn0035995	2.54786	0.492926	Others
	FBgn0035998	3.19804	1.14923	Others
	FBgn0035999	2.5043	0.482045	Others
	FBgn0266101	2.78816	1.30274	Others
	FBgn0266101	2.81296	1.30274	Others
	FBgn0011327	2.99274	-0.867993	Others
	FBgn0036007	2.27309	1.13552	Others
	FBgn0036008	2.64286	-0.927638	Others
	FBgn0010408	2.28642	-0.218852	Others
	FBgn0016081	2.37911	0.639549	Others
	FBgn0036030	2.89164	-0.107787	Others
	FBgn0015321	2.53871	-0.360225	Others
	FBgn0045823	2.64841	0.279532	Others
	FBgn0259163	2.73476	1.72188	Others
	FBgn0004390	2.46311	1.24819	Others
	FBgn0004390	3.41197	1.24819	Others
	FBgn0036058	2.83307	0.369489	Others
	FBgn0036059	2.55715	0.936407	Others
	FBgn0040823	2.20527	1.31556	Others
	FBgn0052062	2.64305	1.52776	Others
	FBgn0052066	2.45139	0.647015	Others
	FBgn0036096	2.25372	-0.934841	Others
	FBgn0010762	2.95769	0.373864	Others
	FBgn0010762	2.17641	0.373864	Others
	FBgn0010762	3.00556	0.373864	Others
	FBgn0036099	2.39277	-0.844006	Others
	FBgn0047038	2.18659	-1.45729	Mito-EBR
	FBgn0026160	2.53748	0.799882	Others
	FBgn0026160	2.33315	0.799882	Others
	FBgn0026160	2.21696	0.799882	Others
	FBgn0036107	2.14909	-0.538073	Others
	FBgn0027615	2.4677	-1.80704	Mito-EBR
	FBgn0036108	2.1478	-0.875553	Others
	FBgn0036111	2.41819	-0.438669	Others
	FBgn0036111	2.33119	-0.438669	Others
	FBgn0263776	2.8297	0.764794	Others
	FBgn0052075	2.49868	-0.814268	Others
	FBgn0020412	2.3507	-0.295093	Others
	FBgn0020412	2.37007	-0.295093	Others
	FBgn0261112	2.94413	-0.298594	Others
	FBgn0036134	2.62201	0.914097	Others
	FBgn0036134	2.41311	0.914097	Others
	FBgn0036134	2.68907	0.914097	Others
	FBgn0036136	3.12298	-0.668108	Others
	FBgn0036142	2.54461	-0.715331	Mito-Others
	FBgn0036147	2.50831	-1.39293	Others
	FBgn0261553	2.24867	0.897342	Others
	FBgn0261553	2.99972	0.897342	Others
	FBgn0041094	2.50437	1.01488	Others
	FBgn0036152	2.34266	0.927434	Others
	FBgn0036152	2.22219	0.927434	Others
	FBgn0036165	2.45058	1.5194	Others
	FBgn0259481	2.20146	1.06233	Others
	FBgn0003292	2.55092	-1.76195	Others
	FBgn0042138	2.42782	-0.948767	Others
	FBgn0052091	2.1747	1.61774	Others
	FBgn0015828	2.7709	-0.302231	Others
	FBgn0036196	2.20149	2.68141	Others
	FBgn0036199	2.45021	0.327539	Mito-Others
	FBgn0036199	2.15479	0.327539	Mito-Others
	FBgn0036211	2.20766	-1.04602	Mito-Others
	FBgn0000404	2.56898	-1.217	Others
	FBgn0036239	2.37341	-0.616556	Others
	FBgn0041096	2.54468	0.469568	Others
	FBgn0022959	2.24885	-0.968444	Others
	FBgn0022959	3.25384	-0.968444	Others
	FBgn0046296	2.69054	0.479262	Others
	FBgn0036254	2.44089	-0.481077	Others
	FBgn0011455	2.25791	-0.747389	Mito-EBR
	FBgn0036259	2.45533	0.876204	Others
	FBgn0027843	2.20641	0.874424	Others
	FBgn0052100	2.40859	0.501196	Others
	FBgn0036273	2.42587	-0.442044	Others
	FBgn0036277	2.53243	-1.21973	Others
	FBgn0036279	2.18115	-1.09955	Others
	FBgn0036279	2.2843	-1.09955	Others
	FBgn0052103	2.2385	0.650903	Mito-Others
	FBgn0052103	2.65944	0.650903	Mito-Others
	FBgn0020655	2.22092	-0.920216	Others
	FBgn0264848	2.69525	-0.293061	Others
	FBgn0002466	2.93468	-1.80067	Others
	FBgn0020388	2.95246	0.90453	Others
	FBgn0036298	2.73993	-1.00724	Others
	FBgn0036298	2.58902	-1.00724	Others
	FBgn0036302	2.75635	0.743397	Others
	FBgn0014007	3.46149	-0.446595	Others
	FBgn0014007	3.66522	-0.446595	Others
	FBgn0052112	2.69616	-0.433028	Others
	FBgn0010235	2.49046	-0.398684	Others
	FBgn0010235	2.41702	-0.398684	Others
	FBgn0260945	2.28925	1.73144	Others
	FBgn0036316	2.30582	0.465232	Others
	FBgn0036316	2.99756	0.465232	Others
	FBgn0052115	3.17261	0.913501	Others
	FBgn0036333	2.42962	0.256162	Others
	FBgn0036334	2.95509	-1.3836	Mito-Others
	FBgn0036336	2.54945	-0.522443	Others
	FBgn0036337	2.21248	-0.833091	Others
	FBgn0036337	2.6407	-0.833091	Others
	FBgn0286213	3.07086	-0.496741	Others
	FBgn0036340	2.6718	-0.753609	Others
	FBgn0011284	2.3901	-0.423406	Others
	FBgn0011284	3.13786	-0.423406	Others
	FBgn0036341	2.66043	0.40417	Others
	FBgn0010452	2.24979	0.318108	Others
	FBgn0023095	2.20601	0.99539	Others
	FBgn0036354	2.48357	1.77415	Others
	FBgn0260049	2.19015	-0.883615	Others
	FBgn0086708	2.4069	0.949622	Others
	FBgn0086708	2.22127	0.949622	Others
	FBgn0036373	2.73911	0.50657	Others
	FBgn0036373	2.17048	0.50657	Others
	FBgn0036381	2.19181	0.515101	Others
	FBgn0036382	2.34497	-0.603525	Others
	FBgn0026376	2.88028	0.408404	Others
	FBgn0052137	2.33446	0.529494	Others
	FBgn0036398	2.3968	1.15063	Others
	FBgn0036398	2.55112	1.15063	Others
	FBgn0061515	2.60232	-0.42357	Others
	FBgn0026418	2.65281	-1.32829	Others
	FBgn0013563	2.59172	-0.941527	Others
	FBgn0013718	2.36668	0.53257	Others
	FBgn0013718	2.39204	0.53257	Others
	FBgn0013718	2.20116	0.53257	Others
	FBgn0001085	2.35872	0.501661	Others
	FBgn0003459	2.67096	0.854223	Others
	FBgn0087007	3.18881	-0.357131	Others
	FBgn0026409	2.91873	-0.819732	Mito-Others
	FBgn0040318	2.24169	1.44373	Others
	FBgn0003388	2.35565	1.31675	Mito-Others
	FBgn0036433	2.23904	1.00409	Others
	FBgn0027375	2.26896	0.692704	Others
	FBgn0041604	2.42497	0.445189	Others
	FBgn0036436	2.2179	-2.44842	Others
	FBgn0013263	3.02412	-0.619627	Others
	FBgn0013263	2.73296	-0.619627	Others
	FBgn0036449	2.28541	0.640849	Others
	FBgn0036451	2.50129	0.67255	Others
	FBgn0036460	2.93405	-0.865321	Others
	FBgn0036463	2.40894	0.607181	Others
	FBgn0086690	2.26898	0.328887	Others
	FBgn0266452	2.64248	-0.780302	Others
	FBgn0266441	2.42631	1.39948	Others
	FBgn0286818	2.80061	-2.08585	Others
	FBgn0047178	2.96323	0.680317	Others
	FBgn0036488	2.58529	-0.881844	Mito-EBR
	FBgn0036489	2.33492	-1.76893	Others
	FBgn0036494	2.23277	1.54417	Others
	FBgn0040805	2.23972	0.313793	Mito-Others
	FBgn0036500	2.65696	-0.234386	Others
	FBgn0036501	2.39992	1.23786	Others
	FBgn0036502	3.24792	0.777686	Others
	FBgn0036505	2.57987	0.277929	Others
	FBgn0262893	2.32636	1.89199	Others
	FBgn0004396	2.4353	-0.505695	Others
	FBgn0087035	2.16552	0.363207	Others
	FBgn0036510	2.42511	-0.559797	Others
	FBgn0267390	2.59138	0.313738	Others
	FBgn0267390	2.39768	0.313738	Others
	FBgn0036515	2.6108	-0.851066	Others
	FBgn0036516	2.79096	-0.24088	Others
	FBgn0036518	2.54961	1.28948	Others
	FBgn0010105	2.31947	0.776797	Others
	FBgn0015025	2.31344	1.27567	Others
	FBgn0036534	2.31394	0.912314	Others
	FBgn0036536	2.80232	-0.758706	Others
	FBgn0036537	2.59821	-0.958277	Others
	FBgn0036538	2.85391	-0.347363	Others
	FBgn0036544	2.71086	2.37039	Others
	FBgn0263601	3.0128	0.319064	Others
	FBgn0005536	2.70165	0.819726	Others
	FBgn0036570	3.03013	-0.870695	Others
	FBgn0010280	2.35833	0.276676	Others
	FBgn0010280	2.90914	0.276676	Others
	FBgn0011016	2.76373	-2.23114	Others
	FBgn0036574	2.44036	-1.17431	Others
	FBgn0036576	2.23948	0.916368	Others
	FBgn0263605	2.3903	-0.831094	Others
	FBgn0036580	2.85847	-1.39845	Others
	FBgn0036621	2.89244	-0.350914	Others
	FBgn0036622	2.7763	-1.47227	Others
	FBgn0036622	2.38246	-1.47227	Others
	FBgn0036623	2.25288	-0.979022	Others
	FBgn0014163	2.47014	1.06037	Others
	FBgn0014163	2.63914	1.06037	Others
	FBgn0028399	2.44036	1.07731	Others
	FBgn0028399	2.36564	1.07731	Others
	FBgn0261799	2.1769	-2.97401	Others
	FBgn0004569	2.67437	0.752651	Others
	FBgn0263131	2.84245	2.58755	Others
	FBgn0036641	2.25933	-0.485302	Others
	FBgn0028693	2.48139	-1.14505	Others
	FBgn0250814	2.79029	-0.896145	Mito-EBR
	FBgn0036643	2.53452	1.34115	Others
	FBgn0003741	2.69608	0.682456	Others
	FBgn0042177	2.25872	-0.868491	Others
	FBgn0002284	2.3095	-1.05362	Others
	FBgn0017572	2.47832	-0.396679	Others
	FBgn0000017	3.1009	0.70898	Others
	FBgn0260960	2.91399	-0.48332	Others
	FBgn0260960	2.80495	-0.48332	Others
	FBgn0036662	2.84613	-1.18983	Others
	FBgn0021768	2.40723	-1.22805	Others
	FBgn0021768	2.76754	-1.22805	Others
	FBgn0036668	2.32529	0.520358	Others
	FBgn0261565	2.31955	-0.240637	Others
	FBgn0261565	3.15903	-0.240637	Others
	FBgn0261565	2.34076	-0.240637	Others
	FBgn0010352	2.73395	-0.428953	Mito-Others
	FBgn0261547	2.45611	0.862548	Others
	FBgn0036685	2.23937	-0.451559	Others
	FBgn0036686	2.58823	-0.899822	Others
	FBgn0036695	2.57601	-0.75237	Others
	FBgn0036696	2.70279	-1.18142	Others
	FBgn0036698	2.30485	1.02618	Mito-Others
	FBgn0260943	2.37636	1.6035	Others
	FBgn0036702	2.27129	0.207469	Mito-Others
	FBgn0036710	2.57913	-1.86533	Others
	FBgn0036714	2.98964	-1.05022	Others
	FBgn0040793	2.83543	-1.67831	Others
	FBgn0053051	2.4339	-1.4435	Others
	FBgn0052174	3.44059	-1.30184	Mito-Others
	FBgn0036726	2.63689	-0.908422	Others
	FBgn0036728	2.69979	-1.6368	Mito-EBR
	FBgn0085279	2.30723	0.742567	Others
	FBgn0036732	2.39777	1.17748	Others
	FBgn0036734	2.43538	0.218835	Others
	FBgn0259174	2.30461	0.533397	Others
	FBgn0025455	2.78116	0.622629	Others
	FBgn0000567	2.27874	2.57015	Others
	FBgn0036740	2.55825	0.428808	Others
	FBgn0004401	2.90745	-0.674578	Others
	FBgn0052177	2.58169	0.56409	Others
	FBgn0052179	2.58091	0.541748	Others
	FBgn0036746	2.52306	0.902117	Others
	FBgn0052190	2.91428	-0.310845	Others
	FBgn0036754	2.51259	-0.446032	Others
	FBgn0036759	2.20194	-0.552084	Others
	FBgn0036764	2.29361	0.399271	Others
	FBgn0036764	2.87023	0.399271	Others
	FBgn0000568	2.16865	0.703763	Others
	FBgn0000568	2.26876	0.703763	Others
	FBgn0000568	2.78125	0.703763	Others
	FBgn0000568	2.19052	0.703763	Others
	FBgn0036774	2.33778	-1.02211	Mito-EBR
	FBgn0036775	2.50862	-0.247475	Others
	FBgn0052195	2.38826	-0.431323	Others
	FBgn0036780	2.4407	0.800004	Others
	FBgn0052196	2.41388	-0.782357	Others
	FBgn0052196	2.19697	-0.782357	Others
	FBgn0013717	2.44053	-1.0616	Others
	FBgn0259791	2.1524	-3.55284	Others
	FBgn0042134	2.60696	-0.60462	Others
	FBgn0042134	2.85534	-0.60462	Others
	FBgn0036805	2.27828	1.13939	Others
	FBgn0036806	2.21452	0.854429	Mito-Others
	FBgn0001078	2.18966	1.9774	Others
	FBgn0036814	2.16639	0.291684	Others
	FBgn0000261	2.51975	0.758928	Mito-Others
	FBgn0036816	2.2776	-0.81409	Others
	FBgn0036820	2.54474	-1.04831	Mito-Others
	FBgn0036821	2.97353	0.347752	Others
	FBgn0036824	2.3339	-1.54236	Mito-Others
	FBgn0036825	2.32356	-0.465604	Others
	FBgn0036826	2.71708	0.827863	Others
	FBgn0052204	2.26584	1.39837	Others
	FBgn0036837	2.19571	0.719378	Others
	FBgn0036838	2.72861	-0.638414	Others
	FBgn0002945	2.35206	0.820327	Others
	FBgn0036842	2.78983	-0.35901	Others
	FBgn0036844	2.24285	1.2967	Others
	FBgn0036846	2.72612	-0.966114	Others
	FBgn0036848	2.1961	-0.353391	Mito-Others
	FBgn0016797	2.25496	0.815102	Others
	FBgn0040075	2.66248	-1.33414	Others
	FBgn0017578	2.89168	0.45254	Others
	FBgn0028380	2.42768	0.264015	Others
	FBgn0003089	2.35596	-2.64139	Others
	FBgn0023395	2.24555	-1.5227	Others
	FBgn0036888	2.50006	-0.210264	Others
	FBgn0036889	3.83968	-0.599048	Mito-EBR
	FBgn0036896	2.32492	0.783007	Others
	FBgn0036897	2.47789	1.06107	Others
	FBgn0261341	2.28292	0.2937	Others
	FBgn0261283	2.66602	0.247561	Others
	FBgn0024889	2.36262	-0.543789	Others
	FBgn0014037	2.73679	0.423886	Others
	FBgn0036915	2.49542	-0.514171	Others
	FBgn0036919	2.38954	-1.56211	Others
	FBgn0036920	2.72042	-0.800749	Mito-EBR
	FBgn0013303	2.73038	0.276869	Others
	FBgn0036926	2.15852	0.913256	Others
	FBgn0036927	2.36335	-1.30703	Mito-Others
	FBgn0036928	3.75539	-0.915457	Mito-EBR
	FBgn0036929	3.04668	-0.496926	Others
	FBgn0036929	2.17952	-0.496926	Others
	FBgn0261574	2.55089	1.02704	Others
	FBgn0261574	2.79378	1.02704	Others
	FBgn0024814	2.18138	-0.520894	Others
	FBgn0265959	3.35465	0.8319	Others
	FBgn0036967	2.55569	-0.506871	Others
	FBgn0003124	2.95203	-2.38445	Others
	FBgn0250791	2.72923	0.617559	Others
	FBgn0036974	2.61196	-0.597381	Others
	FBgn0053969	2.63334	1.07958	Others
	FBgn0028978	2.31659	1.74987	Others
	FBgn0028978	2.17966	1.74987	Others
	FBgn0052428	2.39061	0.510304	Others
	FBgn0036999	2.89136	-0.247573	Mito-Others
	FBgn0037001	2.1513	-0.792032	Mito-EBR
	FBgn0037001	2.55087	-0.792032	Mito-EBR
	FBgn0052425	2.4652	-0.790383	Others
	FBgn0037007	2.2687	2.21049	Mito-Others
	FBgn0037007	2.58453	2.21049	Mito-Others
	FBgn0037012	2.75727	1.10905	Others
	FBgn0037017	2.60104	-0.903323	Others
	FBgn0016696	2.90355	0.452692	Others
	FBgn0037019	2.63389	-0.450259	Others
	FBgn0037020	2.3617	-0.511313	Others
	FBgn0037024	3.10017	-0.968286	Mito-Others
	FBgn0027055	2.6302	-0.550997	Others
	FBgn0003415	2.23708	0.637219	Others
	FBgn0037044	2.56818	-0.755134	Mito-Others
	FBgn0028402	2.31242	-0.66645	Others
	FBgn0026179	2.59322	0.937514	Others
	FBgn0020294	2.50626	-0.38755	Others
	FBgn0037050	2.28056	0.82049	Others
	FBgn0037051	2.93756	-0.502687	Others
	FBgn0024150	2.9206	1.49061	Others
	FBgn0041100	2.65837	0.119348	Others
	FBgn0028427	2.87696	-0.252828	Others
	FBgn0012034	2.29157	-1.00465	Others
	FBgn0027945	2.61496	-1.60976	Mito-Others
	FBgn0037065	3.2929	0.734348	Others
	FBgn0037074	2.58092	0.971722	Others
	FBgn0005694	2.6039	-0.680906	Others
	FBgn0267849	2.6972	0.445203	Others
	FBgn0015239	2.41882	-0.463206	Others
	FBgn0037090	2.238	0.561763	Others
	FBgn0264561	2.63185	-0.844701	Others
	FBgn0037092	2.45883	0.243229	Others
	FBgn0037093	2.3335	-0.33565	Others
	FBgn0037093	2.23196	-0.33565	Others
	FBgn0037094	2.33472	0.303332	Others
	FBgn0029152	3.11658	0.574691	Others
	FBgn0015283	2.84801	-0.804001	Others
	FBgn0263911	2.56732	-1.89886	Mito-EBR
	FBgn0052438	2.22642	0.585444	Others
	FBgn0052441	2.31315	-0.595973	Others
	FBgn0052446	2.84417	-0.992077	Others
	FBgn0037120	3.23902	0.614429	Others
	FBgn0022936	2.69044	-0.384817	Others
	FBgn0052448	2.75196	-1.17583	Others
	FBgn0037137	2.92418	-1.39501	Others
	FBgn0037138	2.99407	-0.83252	Mito-Others
	FBgn0037138	2.6825	-0.83252	Mito-Others
	FBgn0262737	2.37804	0.976825	Others
	FBgn0262737	3.50838	0.976825	Others
	FBgn0027532	2.15925	0.689877	Others
	FBgn0000100	3.07924	-0.757057	Others
	FBgn0037153	2.27717	1.41792	Others
	FBgn0028500	2.37999	-0.327216	Others
	FBgn0037156	2.72742	-0.638689	Others
	FBgn0004449	2.19952	1.22998	Others
[truncated: 1,612 more rows]
