# Supplementary material for: A transcription network underlies the dual genomic coordination of mitochondrial biogenesis
Source: eLife. 2024 Dec 27;13:RP96536. doi: 10.7554/eLife.96536 (PMC11677238; doi:10.7554/eLife.96536)
Supplement: Figure 8—figure supplement 1—source data 1. [file elife-96536-fig8-figsupp1-data1.xlsx]

## Sheet: Source Data
	Source Data Figure 8—figure supplement 1
	Relative TFAM-GFP level
		Ctrl	CG1603-i	STAT92E-i	YL-1-i	Myb-i	trem-i	E(bx)-i
	1	0.925331	0.401426	0.550667	0.388702	0.16128	0.281122	0.148101
	2	1.56277	0.266063	0.444223	0.33448	0.0813825	0.495133	0.239329
	3	0.918936	0.144678	0.505564	0.236274	0.464454	0.451205	0.394025
	4	1.28712	0.205857	0.244885	0.280755	0.141405	0.377245	0.297029
	5	0.859565	0.235506	0.320588	0.19201	0.25429	0.659337	0.688214
	6	1.26325	0.178167	0.18566	0.552645	0.547575	0.154978	0.379283
	7	1.12315	0.17789	0.0848919	0.56139	0.267658	0.112835	0.36008
	8	0.962325	0.0940579	0.181367	0.379482	0.326406	0.23565	0.993947
	9	1.21451	0.536281	0.161955	0.29236	0.0809219	0.183487	1.01364
	10	1.53858	0.480554	0.308162	0.0841246	0.371395	0.176058	0.901315
	mean	1.16555	0.272048	0.298796	0.330222	0.269677	0.312705	0.541496
	SD	0.253619	0.14958	0.157014	0.149499	0.159255	0.177611	0.327521
	t-test		1.67791e-08	3.22946e-08	4.60873e-08	2.08404e-08	7.14834e-08	0.000155114
			p<0.001	p<0.001	p<0.001	p<0.001	p<0.001	p<0.001
