# Supplementary material for: A transcription network underlies the dual genomic coordination of mitochondrial biogenesis
Source: eLife. 2024 Dec 27;13:RP96536. doi: 10.7554/eLife.96536 (PMC11677238; doi:10.7554/eLife.96536)
Supplement: Figure 8—source data 1. [file elife-96536-fig8-data1.xlsx]

## Sheet: Source Data Figure 8C
	Source Data Figure 8C
	Relative CG1603-mNG level
		Ctrl	CG1603-i	YL-1-i
	1	1.48939	0.0236618	0.476939
	2	1.02487	0.122492	0.404131
	3	0.760215	0.0241195	0.509091
	4	0.819318	0.0928571	0.780433
	5	1.06713	0	0.286108
	6	1.029	0.162257	0.623529
	7	0.970624	0.0407698	0.448459
	8	1.01786	0.0732388	0.339817
	9	0.893939	0.189017	0.684352
	10	1.18876	0.0623389	0.452263
	11	1.33782	0.0390021	0.643748
	12	1.07231	0.175569	0.69078
	13	1.07203	0.0626625	0.852129
	14	0.979835	0.0943252	0.928368
	15	0.828537	0.05387	0.592417
	16	1.17217	0.13602	0.512813
	mean	1.04524	0.0845125	0.576586
	SD	0.188841	0.0577525	0.181374
	t-test (Ctrl_CG1603-i)	1.44876e-18
		p<0.001
	t-test (Ctrl_YL-1-i)			5.76735e-08
				p<0.001

## Sheet: Source Data Figure 8D
	Source Data Figure 8D
	Eye Index-R ratio
		Ctrl	CG1603-OE	YL-1-i	YL-1-i+CG1603-OE
	1	1	1.27221	0.617754	1.05849
	2	1	1.26648	0.633917	1.07693
	3	1	1.30258	0.662229	1.10882
	mean	1	1.28042	0.637967	1.08141
	SD	0	0.0193984	0.0225122	0.0254631
	t-test (Ctrl_YL-1-i)	9.88245e-06
		p<0.001
	t-test (YL-1-i_YL-1-i+CG1603-OE)				2.27084e-05
					p<0.001

## Sheet: Source Data Figure 8G
	Source Data Figure 8G
	Relative TFAM-GFP level
		Ctrl	YL-1-i	YL-1-i+CG1603-OE
	1	1.2384	0.345893	2.50543
	2	1.06339	0.747826	1.50741
	3	1.17931	0.530596	2.47272
	4	1.00772	0.610813	1.61217
	5	0.922061	0.845327	2.12357
	6	0.968534	0.576541	1.16722
	7	0.858176	0.720552	2.23702
	8	0.937381	0.609382	2.09082
	9	0.805369	0.573347	2.76281
	10	1.09866	0.874356	2.01024
	11	1.08231	1.02724	3.40035
	12	0.765959	0.853689	1.47547
	13	0.941946	0.903404	1.69266
	14	1.25769	0.678932	2.00774
	15	1.32871	0.713951	2.70566
	16	1.41947	0.848442	2.85411
	mean	1.05469	0.716268	2.16409
	SD	0.189605	0.172489	0.597465
	t-test (Ctrl_YL-1-i)		1.05292e-05
			p<0.001
	t-test (YL-1-i_YL-1-i+CG1603-OE)			2.33837e-10
				p<0.001

## Sheet: Source Data Figure 8H
	Source Data Figure 8H
	Relative mtDNA nucleoids number
		Ctrl	YL-1-i	YL-1-i+CG1603-OE
	1	1.05407	0.512099	1.412
	2	1.13301	0.881776	1.11137
	3	0.778176	0.756793	1.19578
	4	0.924717	0.774643	1.05776
	5	0.833479	0.851338	1.246
	6	1.0823	0.697753	1.00963
	7	0.910241	0.689553	1.39639
	8	0.777452	0.597427	1.48845
	9	0.84566	0.666422	1.45635
	10	1.15493	0.820532	1.21429
	11	0.945048	0.94105	1.59351
	12	1.04905	0.834169	1.01689
	13	1.26572	0.912324	1.1245
	14	1.05479	0.541577	1.33641
	15	1.21679	0.771329	1.56532
	16	0.973011	0.914555	1.22168
	mean	0.999903	0.760209	1.27789
	SD	0.146236	0.128877	0.185173
	t-test (Ctrl_YL-1-i)		4.55102e-05
			p<0.001
	t-test (YL-1-i_YL-1-i+CG1603-OE)			6.62571e-10
				p<0.001

## Sheet: Source Data Figure 8I
	Source Data Figure 8I
	Relative SDHA-mNG level
		Ctrl	YL-1-i	YL-1-i+CG1603-OE
	1	0.774131	0.586018	1.25144
	2	0.875904	0.545322	1.08982
	3	1.30713	0.687125	1.28912
	4	1.17849	0.265895	1.32444
	5	0.823204	0.425863	1.18768
	6	0.795455	0.874667	1.29951
	7	1.13706	0.428615	0.838481
	8	1.29257	0.954988	1.67847
	9	1.17263	0.618078	1.13332
	10	0.815556	0.490778	1.59403
	11	1.05395	0.706626	1.05861
	12	0.814467	1.03243	1.378
	13	0.976103	0.66102	0.972045
	14	1.12195	0.45405	1.00393
	15	0.82659	0.442697	1.16753
	16	1.09263	0.774825	1.29601
	mean	1.00361	0.621813	1.22265
	SD	0.187104	0.210855	0.21783
	t-test (Ctrl_YL-1-i)		7.16578e-06
			p<0.001
	t-test (YL-1-i_YL-1-i+CG1603-OE)			7.56209e-09
				p<0.001

## Sheet: Source Data Figure 8J
	Source Data Figure 8J
	Relative mitochondrial volume
		Ctrl	YL-1-i	YL-1-i+CG1603-OE
	1	0.919489	0.759347	0.930659
	2	1.04524	0.472292	1.23125
	3	1.11493	0.612394	1.16895
	4	1.04138	0.294874	1.24914
	5	0.986958	0.895428	1.04803
	6	0.998628	1.00184	1.36745
	7	1.06028	0.477493	1.17761
	8	1.00255	0.791305	1.35826
	9	1.02889	0.902546	1.14083
	10	0.968428	0.888819	1.27241
	11	1.01673	0.838183	1.09283
	12	1.05139	1.17228	1.26712
	13	0.957078	0.91395	1.17642
	14	0.951098	0.674108	0.948844
	15	0.977705	0.470998	1.15433
	16	0.96859	1.02189	0.813
	mean	1.00559	0.761734	1.14982
	SD	0.0498215	0.241476	0.153519
	t-test (Ctrl_YL-1-i)		0.000430845
			p<0.001
	t-test (YL-1-i_YL-1-i+CG1603-OE)			7.01519e-06
				p<0.001
